# Supplementary material for: 14-Electron Rh and Ir silylphosphine complexes and their catalytic activity in alkene functionalization with hydrosilanes
Source: Royal Society of Chemistry journal article supplement (doi:10.1039/d1dt00677k), 2021-01-01
Supplement: d1dt00677k1.pdf [file d1dt00677k1.pdf]

*Electronic Supplementary Information for*

**14-electron Rh and Ir silylphosphine complexes and their catalytic activity in alkene functionalization with hydrosilanes**

Niroshani S. Abeynayake,<sup>a</sup> Julio Zamora-Moreno,<sup>a,b</sup> Saidulu Gorla,<sup>a</sup> Bruno Donnadieu,<sup>a</sup> Miguel A. Muñoz-Hernández\*<sup>a</sup> and Virginia Montiel-Palma\*<sup>a</sup>

<sup>a</sup> Department of Chemistry

Mississippi State University

Box 9573, Mississippi, 39762, United States

E-mails: mmunoz@chemistry.msstate.edu and vmontiel@chemistry.msstate.edu

<sup>b</sup> Centro de Investigaciones Químicas- IICBA

Universidad Autónoma del Estado de Morelos

Cuernavaca, Morelos, 62209, Mexico

# Table of Contents

|       |                                                                                                                                                                                         |    |
|-------|-----------------------------------------------------------------------------------------------------------------------------------------------------------------------------------------|----|
| 1     | Theoretical computations.....                                                                                                                                                           | 5  |
| 1.1   | General details.....                                                                                                                                                                    | 5  |
| 1.2   | References Computational Part.....                                                                                                                                                      | 5  |
| 1.3   | Calculated cartesian coordinates of complexes <b>Rh-1</b> to <b>Rh-5</b> .....                                                                                                          | 7  |
| 2     | Experimental part .....                                                                                                                                                                 | 19 |
| 2.1   | General experimental considerations.....                                                                                                                                                | 19 |
| 2.2   | Synthesis of [RhBr{ $\kappa^3$ (P,Si,Si) PPh(o-C <sub>6</sub> H <sub>4</sub> CH <sub>2</sub> Si <sup>i</sup> Pr <sub>2</sub> ) <sub>2</sub> }] ( <b>Rh-2</b> ).....                     | 19 |
| 2.3   | Synthesis of [RhI{ $\kappa^3$ (P,Si,Si) PPh(o-C <sub>6</sub> H <sub>4</sub> CH <sub>2</sub> Si <sup>i</sup> Pr <sub>2</sub> ) <sub>2</sub> }] ( <b>Rh-3</b> ) .....                     | 20 |
| 2.4   | Synthesis of [Rh(OTf){ $\kappa^3$ (P,Si,Si) PPh(o-C <sub>6</sub> H <sub>4</sub> CH <sub>2</sub> Si <sup>i</sup> Pr <sub>2</sub> ) <sub>2</sub> }] ( <b>Rh-4</b> ) .....                 | 21 |
| 2.5   | Synthesis of [Rh{ $\kappa^3$ (P,Si,Si) PPh(o-C <sub>6</sub> H <sub>4</sub> CH <sub>2</sub> Si <sup>i</sup> Pr <sub>2</sub> ) <sub>2</sub> }Cl-GaCl <sub>3</sub> ] ( <b>Rh-5</b> ) ..... | 22 |
| 3     | Characterization of new complexes .....                                                                                                                                                 | 23 |
| 3.1   | Characterization of [RhBr{ $\kappa^3$ (P,Si,Si) PPh(o-C <sub>6</sub> H <sub>4</sub> CH <sub>2</sub> Si <sup>i</sup> Pr <sub>2</sub> ) <sub>2</sub> }] ( <b>Rh-2</b> ).....              | 23 |
|       | NMR spectra of <b>Rh-2</b> .....                                                                                                                                                        | 23 |
| 3.2   | Characterization of [RhI{ $\kappa^3$ (P,Si,Si) PPh(o-C <sub>6</sub> H <sub>4</sub> CH <sub>2</sub> Si <sup>i</sup> Pr <sub>2</sub> ) <sub>2</sub> }] ( <b>Rh-3</b> ) .....              | 26 |
|       | NMR spectra of <b>Rh-3</b> .....                                                                                                                                                        | 26 |
| 3.3   | Characterization of [RhOTf{ $\kappa^3$ (P,Si,Si) PPh(o-C <sub>6</sub> H <sub>4</sub> CH <sub>2</sub> Si <sup>i</sup> Pr <sub>2</sub> ) <sub>2</sub> }] ( <b>Rh-4</b> ) .....            | 29 |
|       | NMR spectra of Rh-4 .....                                                                                                                                                               | 29 |
| 3.4   | Synthesis of [RhCl{ $\kappa^3$ (P,Si,Si) PPh(o-C <sub>6</sub> H <sub>4</sub> CH <sub>2</sub> Si <sup>i</sup> Pr <sub>2</sub> ) <sub>2</sub> } GaCl <sub>3</sub> ] ( <b>Rh-5</b> ).....  | 33 |
|       | NMR spectra of <b>Rh-5</b> .....                                                                                                                                                        | 33 |
| 3.5   | Reaction of <b>Rh-1</b> and styrene <i>in situ</i> in an NMR tube.....                                                                                                                  | 36 |
| 3.6   | Optimization of the catalytic dehydrogenative silylation conditions of styrene by Rhodium and Iridium complexes .....                                                                   | 38 |
| 3.7   | General procedure for the catalytic dehydrogenative silylation of vinylarenes.....                                                                                                      | 40 |
| 3.8   | Characterization of Silane Products.....                                                                                                                                                | 40 |
| 3.8.1 | <i>E</i> -Triethyl(styryl)silane (a) .....                                                                                                                                              | 40 |
| 3.8.2 | Triethyl(2-phenylethyl)silane (b) .....                                                                                                                                                 | 40 |
| 3.9   | Catalysis of aromatic and aliphatic alkenes under optimized conditions .....                                                                                                            | 41 |
| 4     | A mechanistic proposal for styrene functionalization with Et <sub>3</sub> SiH .....                                                                                                     | 42 |
| 5     | Catalytic studies on the reaction of Et <sub>3</sub> SiH and aliphatic alkenes.....                                                                                                     | 43 |
| 5.1   | General procedure for the hydrogenative silylation of hexene isomers .....                                                                                                              | 43 |
| 5.2   | Catalyzed functionalization of alkenes in toluene .....                                                                                                                                 | 43 |

|       |                                                                                                              |    |
|-------|--------------------------------------------------------------------------------------------------------------|----|
| 5.2.1 | Triethyl(hexyl)silane (c).....                                                                               | 44 |
| 5.3   | <b>Ir-1</b> catalysis of hexene isomers.....                                                                 | 44 |
| 5.3.1 | Triethyl(hex-2-en-1-yl)silane (d) .....                                                                      | 45 |
| 5.3.2 | General procedure for the hydrogenative silylation of other aliphatic alkenes .....                          | 46 |
| 5.3.3 | Triethyl(octyl)silane (e) .....                                                                              | 46 |
| 5.3.4 | Triethyl(oct-2-en-1-yl)silane (f) .....                                                                      | 46 |
| 5.3.5 | Triethyl(3,3-dimethylbutyl)silane (g) .....                                                                  | 47 |
| 5.3.6 | Cinnamyltriethylsilane (h).....                                                                              | 47 |
| 5.3.7 | Triethyl(3-phenylpropyl)silane (i) .....                                                                     | 47 |
| 6     | Catalytic studies on the reactions of other silanes with styrene and 1-hexene .....                          | 48 |
| 6.1   | Characterization of silane products .....                                                                    | 49 |
| 6.1.1 | Triethoxy(2-phenylethyl)silane (j).....                                                                      | 49 |
| 6.1.2 | Triethoxy(hexyl)silane (k).....                                                                              | 49 |
| 6.1.3 | Diethoxy(methyl)(2-phenylethyl)silane (l) .....                                                              | 50 |
| 6.1.4 | Diethoxy(hexyl)(methyl)silane (m) .....                                                                      | 50 |
| 6.1.5 | 1,1,1,3,5,5,5-heptamethyl-3-phenylethyltrisiloxane (n).....                                                  | 50 |
| 6.1.6 | 3-hexyl-1,1,1,3,5,5,5-heptamethyltrisiloxane (o) .....                                                       | 50 |
| 7     | Mechanistic proposal for hydrosilylation/dehydrogenative silylation by Rh-1 with HSi(OEt) <sub>3</sub> ..... | 51 |
| 8     | Hydrosilylation/dehydrogenative silylation of other substrates .....                                         | 52 |
| 8.1   | General procedure for the catalytic reaction of 2,3-dimethyl-1,4-butadiene and Et <sub>3</sub> SiH .....     | 52 |
| 8.1.1 | (2,3-dimethylbut-2-en-1-yl)triethylsilane (p).....                                                           | 52 |
| 8.1.2 | (2,3-dimethylbut-3-en-1-yl)triethylsilane (q).....                                                           | 52 |
| 9     | NMR spectra .....                                                                                            | 53 |
| 9.1   | NMR spectra of a typical catalysis of styrene and Et <sub>3</sub> SiH .....                                  | 53 |
| 9.2   | NMR spectra of a typical hydrosilylation catalysis of 1-hexene with Et <sub>3</sub> SiH.....                 | 55 |
| 9.3   | NMR spectra of a typical hydrosilylation catalysis of t-2-hexene with Et <sub>3</sub> SiH.....               | 57 |
| 9.4   | NMR spectra of a typical hydrosilylation catalysis of t-3-hexene with Et <sub>3</sub> SiH .....              | 58 |
| 9.5   | NMR spectra of a typical hydrosilylation catalysis of c-2-hexene with Et <sub>3</sub> SiH .....              | 59 |
| 9.6   | NMR spectra of a typical hydrosilylation catalysis of c-3-hexene with Et <sub>3</sub> SiH .....              | 60 |
| 9.7   | NMR spectra of the catalytic hydrosilylation of 1-octene with Et <sub>3</sub> SiH.....                       | 61 |
| 9.8   | NMR spectra of the catalytic hydrosilylation of 3,3-dimethyl-1-butene with Et <sub>3</sub> SiH .....         | 63 |
| 9.9   | NMR spectra of the catalytic hydrosilylation of allylbenzene with Et <sub>3</sub> SiH.....                   | 64 |

|        |                                                                                                         |     |
|--------|---------------------------------------------------------------------------------------------------------|-----|
| 9.10   | NMR spectra of the catalytic hydrosilylation of styrene with (EtO) <sub>3</sub> SiH.....                | 65  |
| 9.11   | NMR spectra of the catalytic hydrosilylation of 1-hexene with (EtO) <sub>3</sub> SiH.....               | 66  |
| 9.12   | NMR spectra of the catalytic hydrosilylation of styrene with (EtO) <sub>2</sub> MeSiH.....              | 67  |
| 9.13   | NMR spectra of catalytic hydrosilylation of 1-hexene with (EtO) <sub>2</sub> MeSiH.....                 | 68  |
| 9.14   | NMR spectra of catalytic hydrosilylation of styrene with (Me <sub>3</sub> SiO) <sub>2</sub> SiMeH.....  | 69  |
| 9.15   | NMR spectra of catalytic hydrosilylation of 1-hexene with (Me <sub>3</sub> SiO) <sub>2</sub> SiMeH..... | 70  |
| 9.16   | NMR spectra of the catalysis of 2,3-dimethyl-1,4-butadiene with Et <sub>3</sub> SiH.....                | 71  |
| 10     | X-ray diffraction analysis data for the complexes.....                                                  | 73  |
| 10.1   | Crystal data of Rh-2.....                                                                               | 73  |
| 10.1.1 | Crystal Structure Report for B_VM_040.....                                                              | 73  |
| 10.1.2 | Crystal's view.....                                                                                     | 74  |
| 10.1.3 | Asymmetric unit's view.....                                                                             | 75  |
| 10.2   | Crystal data of Rh-3.....                                                                               | 83  |
| 10.2.1 | Crystal Structure Report forA_VM_028.....                                                               | 83  |
| 10.2.2 | Asymmetric unit's view.....                                                                             | 84  |
| 10.3   | Crystal data of <b>Rh-4</b> .....                                                                       | 99  |
| 10.3.1 | Crystal Structure Report for CU_B_VM_020_Final.....                                                     | 99  |
| 10.3.2 | Asymmetric unit's view.....                                                                             | 101 |
| 10.4   | Crystal data of <b>Rh-5</b> .....                                                                       | 109 |
| 10.4.1 | Crystal Structure Report for A_VM_013_100K.....                                                         | 109 |
| 10.4.2 | Crystal's view.....                                                                                     | 110 |
| 10.4.3 | Asymmetric unit's view.....                                                                             | 112 |
| 11     | References Experimental Section.....                                                                    | 122 |

# 1 Theoretical computations

## 1.1 General details

The DFT structures *in vacuo* of complexes **Rh-1**, **Rh-2**, **Rh-3**, **Rh-4**, and **Rh-5** were computed as implemented in the Gaussian16 suite of programs[1] with wb97XD method in conjunction with 6-31G(d) basis set for C, H, Cl, P, and Si atoms. Br, Ga, I, and Rh atoms were treated with their Stuttgart–Köln 7, 3, 7, and 17-active electrons relativistic effective core potentials (RECP) in combination with their adapted valence basis sets,[2] respectively. All the optimized structures have been confirmed to be minima through vibrational analysis by the absence of imaginary frequencies. Natural Bond Orbital (NBO) analyses[3] have been performed to gain insight into the electron distribution between donor atoms and Rh center.

**Table S1.** Computed HOMO and LUMO energy gap.

| Complex     | HOMO-LUMO Energy gap (eV) |
|-------------|---------------------------|
| <b>Rh-1</b> | 8.20                      |
| <b>Rh-2</b> | 8.04                      |
| <b>Rh-3</b> | 7.73                      |
| <b>Rh-4</b> | 8.54                      |
| <b>Rh-5</b> | 7.58                      |

**Table S2.** NBO natural charges on atoms Rh, Si1, Si2, P and X (**Rh-4** = O or **Rh-5** = Cl).

| Complex     | Rh    | Si1  | Si2  | P    | X               |
|-------------|-------|------|------|------|-----------------|
| <b>Rh-1</b> | -0.72 | 1.78 | 1.77 | 1.28 | -0.41           |
| <b>Rh-2</b> | -0.78 | 1.78 | 1.77 | 1.29 | -0.37           |
| <b>Rh-3</b> | -0.88 | 1.77 | 1.77 | 1.29 | -0.27           |
| <b>Rh-4</b> | -0.53 | 1.74 | 1.74 | 1.29 | -0.94,<br>-0.96 |
| <b>Rh-5</b> | -0.58 | 1.74 | 1.76 | 1.28 | -0.38           |

## 1.2 References Computational Part

1. Gaussian 16, Revision C.01, M. J. Frisch, G. W. Trucks, H. B. Schlegel, G. E. Scuseria, M. A. Robb, J. R. Cheeseman, G. Scalmani, V. Barone, G. A. Petersson, H. Nakatsuji, X. Li, M. Caricato, A. V. Marenich, J. Bloino, B. G. Janesko, R. Gomperts, B. Mennucci, H. P. Hratchian, J. V. Ortiz, A. F. Izmaylov, J. L. Sonnenberg, D. Williams-Young, F. Ding, F. Lipparini, F. Egidi, J. Goings, B. Peng, A. Petrone, T. Henderson, D. Ranasinghe, V. G. Zakrzewski, J. Gao, N. Rega, G. Zheng, W. Liang, M. Hada, M. Ehara, K. Toyota, R. Fukuda, J. Hasegawa, M. Ishida, T. Nakajima, Y. Honda, O. Kitao, H. Nakai, T. Vreven, K. Throssell, J. A. Montgomery, Jr., J. E. Peralta, F. Ogliaro, M. J. Bearpark, J. J. Heyd, E. N. Brothers, K. N. Kudin, V. N. Staroverov, T. A. Keith, R. Kobayashi, J. Normand, K. Raghavachari, A. P. Rendell, J. C. Burant, S. S. Iyengar, J. Tomasi, M. Cossi, J. M. Millam, M. Klene, C. Adamo, R. Cammi, J. W. Ochterski, R. L. Martin, K. Morokuma, O. Farkas, J. B. Foresman, and D. J. Fox, Gaussian, Inc., Wallingford CT, 2019.

2. (a) A. Bergner, M. Dolg, W. Kuechle, H. Stoll, and H. Preuss, "Ab-initio energy-adjusted pseudopotentials for elements of groups 13-17," *Mol. Phys.*, **80** (1993) 1431-41. (b) U. Haeussermann, M. Dolg, H. Stoll, and H. Preuss, "Accuracy of energy-adjusted quasi-relativistic ab initio pseudopotentials – all-electron and pseudopotential benchmark calculations for HG, HGH and their cations," *Mol. Phys.*, **78** (1993) 1211-24. (c) G. Igel-Mann, H. Stoll, and H. Preuss, "Pseudopotentials for main group elements (IIIA through VIIA)," *Mol. Phys.*, **65** (1988) 1321-28. (d) U. Wedig, M. Dolg, H. Stoll, and H. Preuss, in *Quantum Chemistry: The Challenge of Transition Metals and Coordination Chemistry*, Ed. A. Veillard, Reidel, and Dordrecht (1986) 79.

3. Reed, A. E.; Weinstock, R. B.; Weinhold, F. *The Journal of Chemical Physics* **1985**, *83*, 735.

### 1.3 Calculated cartesian coordinates of complexes Rh-1 to Rh-5

Rh-1

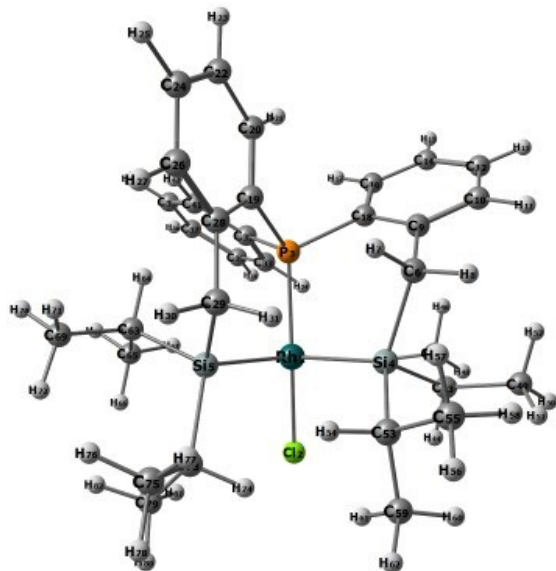

|    |              |              |              |
|----|--------------|--------------|--------------|
| 45 | 0.593650000  | -0.261730000 | -1.041889000 |
| 17 | 2.032354000  | -0.962273000 | -2.717133000 |
| 15 | -1.143483000 | 0.586750000  | 0.088364000  |
| 14 | 2.016096000  | 1.035151000  | 0.226293000  |
| 14 | 0.455170000  | -2.102902000 | 0.329423000  |
| 6  | 1.088628000  | 2.050191000  | 1.571830000  |
| 1  | 0.667535000  | 1.359787000  | 2.314874000  |
| 1  | 1.826886000  | 2.660968000  | 2.104462000  |
| 6  | 0.018457000  | 2.936156000  | 1.000068000  |
| 6  | 0.101967000  | 4.325199000  | 1.130110000  |
| 1  | 0.934215000  | 4.750785000  | 1.684939000  |
| 6  | -0.847199000 | 5.167115000  | 0.560915000  |
| 1  | -0.749742000 | 6.242901000  | 0.673041000  |
| 6  | -1.918279000 | 4.631688000  | -0.146894000 |
| 1  | -2.665879000 | 5.281278000  | -0.591316000 |
| 6  | -2.028881000 | 3.251664000  | -0.280448000 |
| 1  | -2.865665000 | 2.833729000  | -0.831652000 |
| 6  | -1.070773000 | 2.403894000  | 0.279882000  |
| 6  | -1.712103000 | 0.056420000  | 1.751081000  |
| 6  | -2.866220000 | 0.690252000  | 2.236592000  |
| 1  | -3.327536000 | 1.479119000  | 1.648191000  |
| 6  | -3.437471000 | 0.326559000  | 3.445973000  |
| 1  | -4.333465000 | 0.827014000  | 3.799281000  |
| 6  | -2.844410000 | -0.686381000 | 4.195158000  |
| 1  | -3.278055000 | -0.993365000 | 5.142394000  |

|   |              |              |              |
|---|--------------|--------------|--------------|
| 6 | -1.684960000 | -1.295441000 | 3.737938000  |
| 1 | -1.215021000 | -2.067265000 | 4.341841000  |
| 6 | -1.079961000 | -0.937035000 | 2.523929000  |
| 6 | 0.222704000  | -1.603253000 | 2.155942000  |
| 1 | 0.341292000  | -2.499076000 | 2.777049000  |
| 1 | 1.054757000  | -0.943786000 | 2.439012000  |
| 6 | -2.559141000 | 0.254246000  | -1.031182000 |
| 6 | -2.411539000 | 0.648753000  | -2.369737000 |
| 1 | -1.537880000 | 1.220726000  | -2.675004000 |
| 6 | -3.372455000 | 0.313668000  | -3.316257000 |
| 1 | -3.242979000 | 0.626325000  | -4.347643000 |
| 6 | -4.487293000 | -0.433440000 | -2.941874000 |
| 1 | -5.232837000 | -0.706529000 | -3.682400000 |
| 6 | -4.639522000 | -0.832311000 | -1.617970000 |
| 1 | -5.504634000 | -1.417287000 | -1.320856000 |
| 6 | -3.682993000 | -0.489451000 | -0.665348000 |
| 1 | -3.813212000 | -0.814092000 | 0.361696000  |
| 6 | 2.729519000  | 2.261393000  | -1.056736000 |
| 1 | 3.420675000  | 1.650234000  | -1.652823000 |
| 6 | 1.694813000  | 2.846655000  | -2.031505000 |
| 1 | 0.947669000  | 3.461892000  | -1.518638000 |
| 1 | 1.170108000  | 2.057336000  | -2.584196000 |
| 1 | 2.191859000  | 3.482023000  | -2.776608000 |
| 6 | 3.531171000  | 3.387914000  | -0.387013000 |
| 1 | 3.999705000  | 4.030466000  | -1.144194000 |
| 1 | 4.331096000  | 3.005066000  | 0.256585000  |
| 1 | 2.883929000  | 4.028616000  | 0.224369000  |
| 6 | 3.430295000  | 0.085529000  | 1.099024000  |
| 1 | 3.005555000  | -0.873884000 | 1.419851000  |
| 6 | 3.951188000  | 0.780894000  | 2.366956000  |
| 1 | 4.762946000  | 0.194968000  | 2.817186000  |
| 1 | 3.167568000  | 0.894523000  | 3.124712000  |
| 1 | 4.352770000  | 1.778704000  | 2.153672000  |
| 6 | 4.578070000  | -0.231678000 | 0.129561000  |
| 1 | 5.114653000  | 0.679985000  | -0.160354000 |
| 1 | 4.218084000  | -0.709101000 | -0.788680000 |
| 1 | 5.306803000  | -0.903736000 | 0.600995000  |
| 6 | -1.153947000 | -3.033666000 | -0.125275000 |
| 1 | -1.954386000 | -2.367648000 | 0.225809000  |
| 6 | -1.382356000 | -3.248205000 | -1.627081000 |
| 1 | -0.617226000 | -3.894134000 | -2.069115000 |
| 1 | -1.368561000 | -2.300651000 | -2.178985000 |
| 1 | -2.359714000 | -3.716377000 | -1.805104000 |
| 6 | -1.300577000 | -4.341732000 | 0.668700000  |
| 1 | -2.278501000 | -4.802018000 | 0.474284000  |
| 1 | -1.227821000 | -4.172980000 | 1.749978000  |
| 1 | -0.536120000 | -5.076375000 | 0.393259000  |
| 6 | 2.029134000  | -3.185128000 | 0.192797000  |



|   |             |              |              |
|---|-------------|--------------|--------------|
| 1 | 2.845983000 | -2.484265000 | -0.015974000 |
| 6 | 2.365839000 | -3.920974000 | 1.499724000  |
| 1 | 1.558937000 | -4.598280000 | 1.807114000  |
| 1 | 2.553470000 | -3.227732000 | 2.327997000  |
| 1 | 3.269864000 | -4.530233000 | 1.371408000  |
| 6 | 1.988367000 | -4.163824000 | -0.989804000 |
| 1 | 2.952689000 | -4.679860000 | -1.083903000 |
| 1 | 1.799396000 | -3.643435000 | -1.933017000 |
| 1 | 1.220605000 | -4.934624000 | -0.857112000 |

## Rh-2

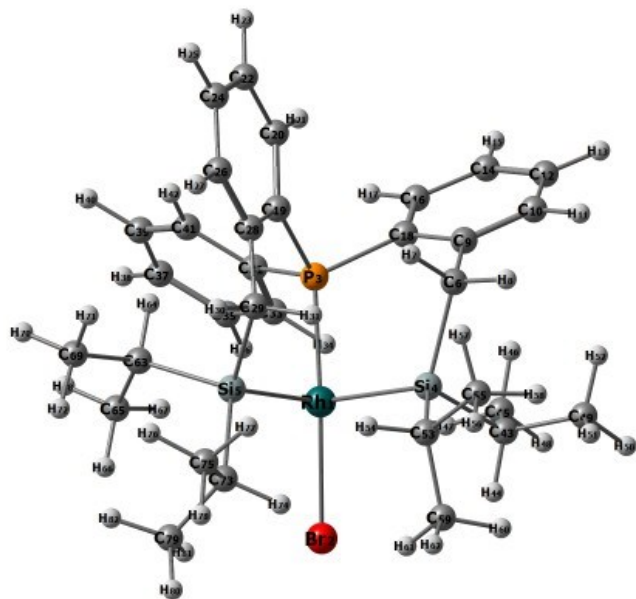

|    |              |              |              |
|----|--------------|--------------|--------------|
| 45 | 0.659937000  | -0.082730000 | -0.798221000 |
| 35 | 2.551434000  | -0.404824000 | -2.355519000 |
| 15 | -1.399608000 | 0.245314000  | 0.006604000  |
| 14 | 1.424767000  | 1.619437000  | 0.560473000  |
| 14 | 0.850474000  | -1.835285000 | 0.683738000  |
| 6  | 0.039926000  | 2.348335000  | 1.681367000  |
| 1  | -0.276878000 | 1.586161000  | 2.405662000  |
| 1  | 0.474452000  | 3.166365000  | 2.267533000  |
| 6  | -1.134248000 | 2.858510000  | 0.895512000  |
| 6  | -1.481507000 | 4.211771000  | 0.932170000  |
| 1  | -0.912331000 | 4.882180000  | 1.571019000  |
| 6  | -2.527104000 | 4.714649000  | 0.165641000  |
| 1  | -2.766940000 | 5.772903000  | 0.209576000  |
| 6  | -3.263556000 | 3.864079000  | -0.652540000 |
| 1  | -4.083232000 | 4.247896000  | -1.251792000 |
| 6  | -2.944873000 | 2.510924000  | -0.696373000 |
| 1  | -3.520844000 | 1.846340000  | -1.333022000 |

|   |              |              |              |
|---|--------------|--------------|--------------|
| 6 | -1.888127000 | 2.005286000  | 0.063915000  |
| 6 | -2.049842000 | -0.380756000 | 1.603485000  |
| 6 | -3.402506000 | -0.112593000 | 1.863502000  |
| 1 | -3.973453000 | 0.481378000  | 1.154539000  |
| 6 | -4.029868000 | -0.596569000 | 3.000876000  |
| 1 | -5.078668000 | -0.381669000 | 3.179428000  |
| 6 | -3.294502000 | -1.358598000 | 3.905146000  |
| 1 | -3.766701000 | -1.754307000 | 4.799541000  |
| 6 | -1.948450000 | -1.599799000 | 3.671783000  |
| 1 | -1.376573000 | -2.173622000 | 4.396273000  |
| 6 | -1.287118000 | -1.111137000 | 2.535229000  |
| 6 | 0.195149000  | -1.360689000 | 2.412118000  |
| 1 | 0.473147000  | -2.153012000 | 3.117066000  |
| 1 | 0.739297000  | -0.468585000 | 2.751385000  |
| 6 | -2.447407000 | -0.532112000 | -1.283292000 |
| 6 | -2.194137000 | -0.157106000 | -2.611749000 |
| 1 | -1.484171000 | 0.638568000  | -2.827300000 |
| 6 | -2.840849000 | -0.796706000 | -3.662591000 |
| 1 | -2.632474000 | -0.495906000 | -4.684486000 |
| 6 | -3.739067000 | -1.829255000 | -3.401606000 |
| 1 | -4.236137000 | -2.338019000 | -4.221904000 |
| 6 | -3.993473000 | -2.209580000 | -2.087844000 |
| 1 | -4.690432000 | -3.015438000 | -1.878807000 |
| 6 | -3.353599000 | -1.564604000 | -1.032235000 |
| 1 | -3.556979000 | -1.878088000 | -0.013602000 |
| 6 | 1.941448000  | 2.975181000  | -0.686825000 |
| 1 | 2.864261000  | 2.586127000  | -1.138064000 |
| 6 | 0.945614000  | 3.211126000  | -1.834068000 |
| 1 | -0.012938000 | 3.599519000  | -1.473458000 |
| 1 | 0.752399000  | 2.290337000  | -2.398222000 |
| 1 | 1.352782000  | 3.941966000  | -2.545252000 |
| 6 | 2.268403000  | 4.301570000  | 0.016697000  |
| 1 | 2.644472000  | 5.037642000  | -0.706062000 |
| 1 | 3.033342000  | 4.185997000  | 0.792740000  |
| 1 | 1.375890000  | 4.735085000  | 0.484275000  |
| 6 | 2.895837000  | 1.161484000  | 1.697511000  |
| 1 | 2.732355000  | 0.123262000  | 2.011727000  |
| 6 | 2.965279000  | 2.002779000  | 2.982182000  |
| 1 | 3.828845000  | 1.701187000  | 3.588969000  |
| 1 | 2.069156000  | 1.882114000  | 3.601553000  |
| 1 | 3.078225000  | 3.072247000  | 2.768157000  |
| 6 | 4.231354000  | 1.197192000  | 0.940822000  |
| 1 | 4.505786000  | 2.223486000  | 0.668193000  |
| 1 | 4.195395000  | 0.608824000  | 0.017118000  |
| 1 | 5.039676000  | 0.797939000  | 1.567007000  |
| 6 | -0.330031000 | -3.218346000 | 0.087796000  |
| 1 | -1.332931000 | -2.800261000 | 0.251481000  |
| 6 | -0.232873000 | -3.565821000 | -1.403219000 |

|   |              |              |              |
|---|--------------|--------------|--------------|
| 1 | 0.745569000  | -3.981565000 | -1.663821000 |
| 1 | -0.392036000 | -2.684669000 | -2.036325000 |
| 1 | -0.995433000 | -4.307739000 | -1.675682000 |
| 6 | -0.234379000 | -4.469131000 | 0.976509000  |
| 1 | -0.990488000 | -5.208736000 | 0.681138000  |
| 1 | -0.404823000 | -4.231927000 | 2.033633000  |
| 1 | 0.743537000  | -4.956103000 | 0.896862000  |
| 6 | 2.671129000  | -2.406415000 | 0.867442000  |
| 1 | 3.277771000  | -1.510362000 | 0.689703000  |
| 6 | 2.994606000  | -2.919009000 | 2.280358000  |
| 1 | 2.375918000  | -3.783987000 | 2.551683000  |
| 1 | 2.845547000  | -2.148447000 | 3.045658000  |
| 1 | 4.043000000  | -3.238909000 | 2.337553000  |
| 6 | 3.097732000  | -3.435060000 | -0.190079000 |
| 1 | 4.172036000  | -3.641537000 | -0.100176000 |
| 1 | 2.917985000  | -3.068934000 | -1.204782000 |
| 1 | 2.573276000  | -4.389476000 | -0.067452000 |

### Rh-3

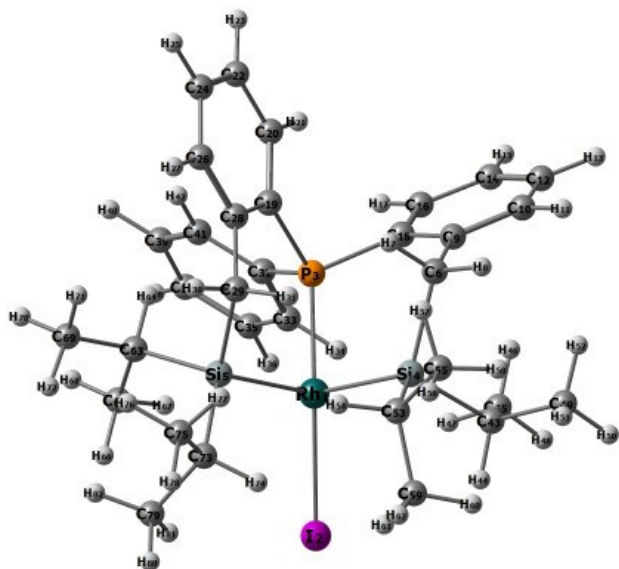

|    |              |              |              |
|----|--------------|--------------|--------------|
| 45 | 0.645598000  | -0.023312000 | -0.563788000 |
| 53 | 2.898395000  | -0.224650000 | -1.923912000 |
| 15 | -1.546898000 | 0.119100000  | -0.144339000 |
| 14 | 0.987971000  | 1.782291000  | 0.839709000  |
| 14 | 0.732571000  | -1.707939000 | 1.010457000  |
| 6  | -0.640430000 | 2.388854000  | 1.671518000  |
| 1  | -1.007974000 | 1.614155000  | 2.357402000  |
| 1  | -0.398216000 | 3.258100000  | 2.293781000  |
| 6  | -1.698485000 | 2.762059000  | 0.672907000  |
| 6  | -2.178883000 | 4.072351000  | 0.598244000  |

|   |              |              |              |
|---|--------------|--------------|--------------|
| 1 | -1.803908000 | 4.809598000  | 1.303482000  |
| 6 | -3.112648000 | 4.449912000  | -0.360535000 |
| 1 | -3.460216000 | 5.478076000  | -0.398477000 |
| 6 | -3.600115000 | 3.513287000  | -1.266506000 |
| 1 | -4.330805000 | 3.799656000  | -2.016405000 |
| 6 | -3.147261000 | 2.199788000  | -1.203427000 |
| 1 | -3.529598000 | 1.467382000  | -1.907852000 |
| 6 | -2.202094000 | 1.820716000  | -0.247721000 |
| 6 | -2.413585000 | -0.532761000 | 1.334121000  |
| 6 | -3.810774000 | -0.403131000 | 1.335395000  |
| 1 | -4.299028000 | 0.109343000  | 0.510526000  |
| 6 | -4.583454000 | -0.922572000 | 2.362343000  |
| 1 | -5.663354000 | -0.815891000 | 2.340919000  |
| 6 | -3.952963000 | -1.579396000 | 3.416074000  |
| 1 | -4.538561000 | -2.000628000 | 4.227935000  |
| 6 | -2.569618000 | -1.681992000 | 3.438335000  |
| 1 | -2.085157000 | -2.173535000 | 4.277917000  |
| 6 | -1.764298000 | -1.154273000 | 2.418174000  |
| 6 | -0.267253000 | -1.248264000 | 2.571180000  |
| 1 | -0.044751000 | -1.983363000 | 3.353300000  |
| 1 | 0.116167000  | -0.293314000 | 2.955711000  |
| 6 | -2.256329000 | -0.791217000 | -1.569739000 |
| 6 | -1.798452000 | -0.423317000 | -2.844381000 |
| 1 | -1.140885000 | 0.435466000  | -2.960840000 |
| 6 | -2.173624000 | -1.151153000 | -3.967405000 |
| 1 | -1.808314000 | -0.855185000 | -4.945682000 |
| 6 | -3.000691000 | -2.263869000 | -3.831113000 |
| 1 | -3.285006000 | -2.840535000 | -4.705995000 |
| 6 | -3.457037000 | -2.637000000 | -2.570883000 |
| 1 | -4.099813000 | -3.504814000 | -2.458688000 |
| 6 | -3.089403000 | -1.905244000 | -1.444528000 |
| 1 | -3.446954000 | -2.214007000 | -0.467751000 |
| 6 | 1.585004000  | 3.174508000  | -0.330455000 |
| 1 | 2.607185000  | 2.878006000  | -0.602438000 |
| 6 | 0.790912000  | 3.310178000  | -1.639655000 |
| 1 | -0.246018000 | 3.613907000  | -1.460964000 |
| 1 | 0.779684000  | 2.372026000  | -2.207340000 |
| 1 | 1.251902000  | 4.069356000  | -2.285206000 |
| 6 | 1.652394000  | 4.529690000  | 0.391434000  |
| 1 | 2.081835000  | 5.294813000  | -0.268615000 |
| 1 | 2.271274000  | 4.493385000  | 1.294869000  |
| 1 | 0.653086000  | 4.877138000  | 0.680720000  |
| 6 | 2.263903000  | 1.495288000  | 2.240258000  |
| 1 | 2.156019000  | 0.447303000  | 2.544766000  |
| 6 | 2.000978000  | 2.344857000  | 3.494230000  |
| 1 | 2.761175000  | 2.140201000  | 4.259130000  |
| 1 | 1.021689000  | 2.131481000  | 3.937655000  |
| 1 | 2.039699000  | 3.419310000  | 3.279080000  |

|   |              |              |              |
|---|--------------|--------------|--------------|
| 6 | 3.707113000  | 1.672262000  | 1.748082000  |
| 1 | 3.917446000  | 2.719074000  | 1.497701000  |
| 1 | 3.912943000  | 1.071734000  | 0.855039000  |
| 1 | 4.419049000  | 1.373136000  | 2.528137000  |
| 6 | -0.194919000 | -3.217734000 | 0.286646000  |
| 1 | -1.241090000 | -2.885810000 | 0.237847000  |
| 6 | 0.206965000  | -3.621797000 | -1.137239000 |
| 1 | 1.246871000  | -3.959488000 | -1.189495000 |
| 1 | 0.099140000  | -2.788116000 | -1.841130000 |
| 1 | -0.429260000 | -4.441289000 | -1.497533000 |
| 6 | -0.170109000 | -4.413712000 | 1.252637000  |
| 1 | -0.792562000 | -5.231473000 | 0.865712000  |
| 1 | -0.560391000 | -4.146638000 | 2.242084000  |
| 1 | 0.840632000  | -4.813036000 | 1.388468000  |
| 6 | 2.532978000  | -2.094191000 | 1.552332000  |
| 1 | 3.088188000  | -1.159187000 | 1.408737000  |
| 6 | 2.637890000  | -2.478071000 | 3.037522000  |
| 1 | 2.058323000  | -3.381820000 | 3.265540000  |
| 1 | 2.285398000  | -1.679177000 | 3.700081000  |
| 1 | 3.682346000  | -2.686599000 | 3.302510000  |
| 6 | 3.224931000  | -3.151117000 | 0.679220000  |
| 1 | 4.279088000  | -3.245717000 | 0.969745000  |
| 1 | 3.201193000  | -2.882871000 | -0.380602000 |
| 1 | 2.766718000  | -4.139728000 | 0.794417000  |

#### Rh-4

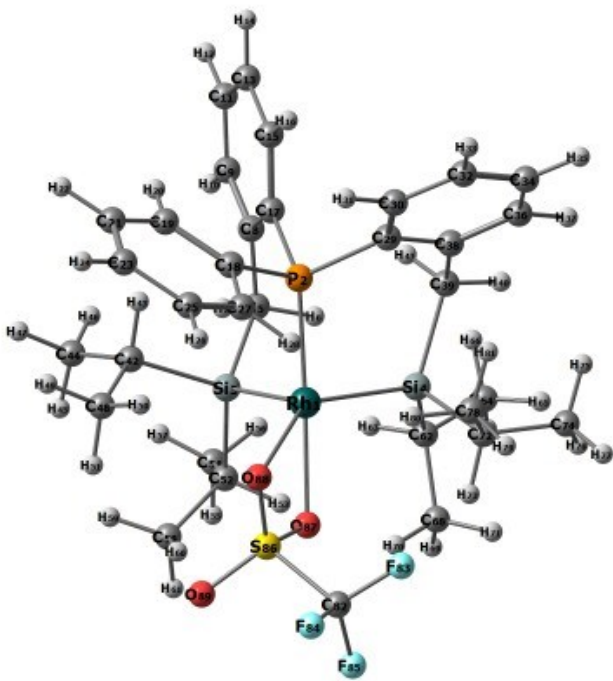

|    |             |              |             |
|----|-------------|--------------|-------------|
| 45 | 0.540705000 | -0.080192000 | 0.020657000 |
|----|-------------|--------------|-------------|

|    |              |              |              |
|----|--------------|--------------|--------------|
| 15 | -1.588264000 | 0.205547000  | 0.631485000  |
| 14 | -0.193528000 | -1.733346000 | -1.398597000 |
| 14 | 0.315110000  | 1.675371000  | -1.447717000 |
| 6  | -1.733968000 | -1.205589000 | -2.384818000 |
| 1  | -1.490760000 | -0.293017000 | -2.946370000 |
| 1  | -1.934417000 | -1.967255000 | -3.147615000 |
| 6  | -2.998430000 | -0.973415000 | -1.596301000 |
| 6  | -4.212983000 | -1.384369000 | -2.165772000 |
| 1  | -4.186982000 | -1.893382000 | -3.125646000 |
| 6  | -5.435158000 | -1.145917000 | -1.555270000 |
| 1  | -6.351920000 | -1.479880000 | -2.032139000 |
| 6  | -5.481092000 | -0.464743000 | -0.341723000 |
| 1  | -6.429740000 | -0.251949000 | 0.140709000  |
| 6  | -4.294103000 | -0.059517000 | 0.247553000  |
| 1  | -4.328829000 | 0.469444000  | 1.196178000  |
| 6  | -3.050499000 | -0.327185000 | -0.346644000 |
| 6  | -1.737839000 | -0.678788000 | 2.229610000  |
| 6  | -2.652553000 | -1.709917000 | 2.459465000  |
| 1  | -3.391638000 | -1.965871000 | 1.707779000  |
| 6  | -2.613940000 | -2.428063000 | 3.651339000  |
| 1  | -3.325176000 | -3.231949000 | 3.814784000  |
| 6  | -1.666868000 | -2.123116000 | 4.624036000  |
| 1  | -1.635320000 | -2.690109000 | 5.549474000  |
| 6  | -0.752038000 | -1.096736000 | 4.403250000  |
| 1  | 0.001019000  | -0.861731000 | 5.148340000  |
| 6  | -0.782015000 | -0.383550000 | 3.211232000  |
| 1  | -0.039822000 | 0.390299000  | 3.037609000  |
| 6  | -2.003326000 | 1.956324000  | 0.962092000  |
| 6  | -2.379445000 | 2.400348000  | 2.231131000  |
| 1  | -2.449775000 | 1.694068000  | 3.052423000  |
| 6  | -2.657180000 | 3.744537000  | 2.457161000  |
| 1  | -2.941987000 | 4.079553000  | 3.449566000  |
| 6  | -2.569670000 | 4.648302000  | 1.403773000  |
| 1  | -2.785368000 | 5.700051000  | 1.566875000  |
| 6  | -2.205894000 | 4.206787000  | 0.136039000  |
| 1  | -2.139863000 | 4.918938000  | -0.682561000 |
| 6  | -1.909199000 | 2.864314000  | -0.113234000 |
| 6  | -1.449658000 | 2.428893000  | -1.477371000 |
| 1  | -1.439988000 | 3.291251000  | -2.154120000 |
| 1  | -2.149480000 | 1.703959000  | -1.913299000 |
| 6  | -0.788128000 | -3.188173000 | -0.309560000 |
| 1  | -1.706919000 | -2.813280000 | 0.163120000  |
| 6  | -1.204916000 | -4.395503000 | -1.165887000 |
| 1  | -0.352285000 | -4.839825000 | -1.690558000 |
| 1  | -1.956815000 | -4.125368000 | -1.917376000 |
| 1  | -1.641346000 | -5.179935000 | -0.533641000 |
| 6  | 0.162544000  | -3.591131000 | 0.825692000  |
| 1  | -0.280155000 | -4.396709000 | 1.426450000  |

|    |              |              |              |
|----|--------------|--------------|--------------|
| 1  | 0.366828000  | -2.754977000 | 1.503818000  |
| 1  | 1.126607000  | -3.949238000 | 0.450617000  |
| 6  | 1.193804000  | -2.207868000 | -2.629363000 |
| 1  | 1.775556000  | -1.292489000 | -2.786454000 |
| 6  | 0.640160000  | -2.649062000 | -3.994431000 |
| 1  | 1.463844000  | -2.910021000 | -4.671263000 |
| 1  | 0.054193000  | -1.860360000 | -4.480746000 |
| 1  | -0.000863000 | -3.535453000 | -3.906748000 |
| 6  | 2.174974000  | -3.254285000 | -2.081019000 |
| 1  | 1.691240000  | -4.224023000 | -1.919155000 |
| 1  | 2.632239000  | -2.940378000 | -1.139807000 |
| 1  | 2.988266000  | -3.415280000 | -2.800501000 |
| 6  | 0.870849000  | 1.366365000  | -3.250305000 |
| 1  | 0.526853000  | 0.357908000  | -3.512074000 |
| 6  | 0.233702000  | 2.326809000  | -4.266632000 |
| 1  | 0.477906000  | 3.374035000  | -4.052263000 |
| 1  | -0.858642000 | 2.238528000  | -4.283495000 |
| 1  | 0.598109000  | 2.109604000  | -5.278973000 |
| 6  | 2.403177000  | 1.364797000  | -3.369553000 |
| 1  | 2.711962000  | 1.032404000  | -4.368912000 |
| 1  | 2.872563000  | 0.704317000  | -2.632442000 |
| 1  | 2.813490000  | 2.370665000  | -3.219021000 |
| 6  | 1.490954000  | 2.928199000  | -0.601700000 |
| 1  | 2.494446000  | 2.513727000  | -0.769335000 |
| 6  | 1.428275000  | 4.313941000  | -1.262438000 |
| 1  | 0.435985000  | 4.766092000  | -1.141972000 |
| 1  | 1.653716000  | 4.276360000  | -2.333755000 |
| 1  | 2.153309000  | 4.995725000  | -0.798493000 |
| 6  | 1.304829000  | 3.062094000  | 0.920087000  |
| 1  | 2.105711000  | 3.678338000  | 1.347588000  |
| 1  | 1.341323000  | 2.093711000  | 1.436452000  |
| 1  | 0.351125000  | 3.535529000  | 1.172557000  |
| 6  | 4.467066000  | 0.317246000  | 1.423056000  |
| 9  | 3.964656000  | 1.552233000  | 1.458990000  |
| 9  | 4.971487000  | 0.026145000  | 2.616876000  |
| 9  | 5.434948000  | 0.277093000  | 0.513956000  |
| 16 | 3.150715000  | -0.902709000 | 0.989324000  |
| 8  | 2.661639000  | -0.392492000 | -0.345193000 |
| 8  | 2.079992000  | -0.707414000 | 1.988917000  |
| 8  | 3.817376000  | -2.189220000 | 0.949076000  |

Rh-5

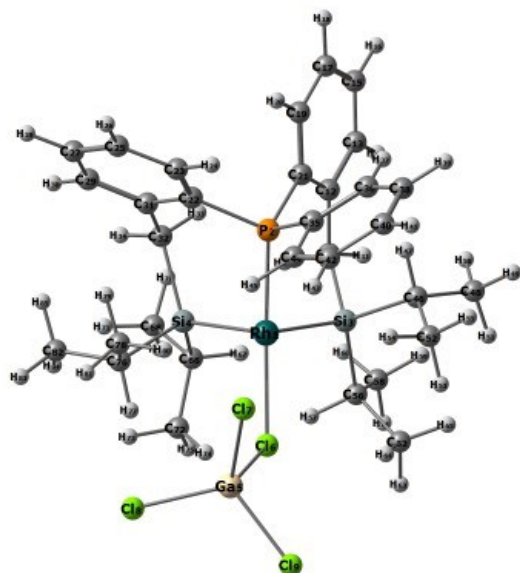

|    |              |              |              |
|----|--------------|--------------|--------------|
| 45 | 0.175852000  | -0.204291000 | 0.148264000  |
| 15 | -1.776701000 | 0.387278000  | -0.781781000 |
| 14 | -0.963348000 | -1.922120000 | 1.197759000  |
| 14 | -0.123700000 | 1.439169000  | 1.756029000  |
| 31 | 4.071038000  | -0.164965000 | -0.726387000 |
| 17 | 2.414522000  | -0.885625000 | 0.803954000  |
| 17 | 2.953766000  | 0.159580000  | -2.615152000 |
| 17 | 4.882262000  | 1.683974000  | 0.139716000  |
| 17 | 5.467687000  | -1.845911000 | -0.816578000 |
| 6  | -2.602231000 | -1.307123000 | 1.946561000  |
| 1  | -3.009859000 | -2.108247000 | 2.574212000  |
| 6  | -3.674062000 | -0.863366000 | 0.983425000  |
| 6  | -5.003090000 | -1.209043000 | 1.268338000  |
| 1  | -5.203000000 | -1.818784000 | 2.145398000  |
| 6  | -6.062155000 | -0.783255000 | 0.480064000  |
| 1  | -7.076811000 | -1.072213000 | 0.737183000  |
| 6  | -5.821247000 | 0.025339000  | -0.627749000 |
| 1  | -6.640500000 | 0.382090000  | -1.243559000 |
| 6  | -4.515420000 | 0.371151000  | -0.937531000 |
| 1  | -4.324281000 | 0.999374000  | -1.803447000 |
| 6  | -3.436337000 | -0.082419000 | -0.162877000 |
| 6  | -1.935120000 | 2.193480000  | -0.989942000 |
| 6  | -2.027915000 | 2.787611000  | -2.250361000 |
| 1  | -2.023070000 | 2.170615000  | -3.143272000 |
| 6  | -2.116378000 | 4.169950000  | -2.373126000 |
| 1  | -2.179874000 | 4.623307000  | -3.357111000 |
| 6  | -2.123568000 | 4.960492000  | -1.228628000 |
| 1  | -2.192353000 | 6.040885000  | -1.312194000 |



|   |              |              |              |
|---|--------------|--------------|--------------|
| 6 | -2.042692000 | 4.369734000  | 0.027757000  |
| 1 | -2.050279000 | 4.994454000  | 0.917107000  |
| 6 | -1.939800000 | 2.984444000  | 0.176597000  |
| 6 | -1.786156000 | 2.372437000  | 1.540776000  |
| 1 | -2.620554000 | 1.694275000  | 1.763808000  |
| 1 | -1.821726000 | 3.160185000  | 2.302324000  |
| 6 | -1.663749000 | -0.329105000 | -2.461332000 |
| 6 | -2.583730000 | -1.245152000 | -2.978762000 |
| 1 | -3.486595000 | -1.488240000 | -2.428283000 |
| 6 | -2.340330000 | -1.862061000 | -4.202461000 |
| 1 | -3.058664000 | -2.575971000 | -4.593656000 |
| 6 | -1.181412000 | -1.573078000 | -4.917974000 |
| 1 | -0.991988000 | -2.064747000 | -5.867194000 |
| 6 | -0.262755000 | -0.657239000 | -4.412039000 |
| 1 | 0.650002000  | -0.431638000 | -4.953689000 |
| 6 | -0.501818000 | -0.040136000 | -3.189665000 |
| 1 | 0.230414000  | 0.662833000  | -2.801202000 |
| 6 | -1.459164000 | -3.160933000 | -0.167442000 |
| 1 | -2.219034000 | -2.623798000 | -0.750575000 |
| 6 | -2.160154000 | -4.400415000 | 0.411961000  |
| 1 | -2.530079000 | -5.043007000 | -0.397569000 |
| 1 | -3.022298000 | -4.127658000 | 1.032562000  |
| 1 | -1.485620000 | -5.007726000 | 1.024493000  |
| 6 | -0.334878000 | -3.535030000 | -1.142902000 |
| 1 | 0.477367000  | -4.074846000 | -0.646083000 |
| 1 | 0.101164000  | -2.649382000 | -1.622519000 |
| 1 | -0.719750000 | -4.177835000 | -1.944993000 |
| 6 | 0.089913000  | -2.694640000 | 2.601127000  |
| 1 | 0.729254000  | -1.887425000 | 2.979928000  |
| 6 | -0.772634000 | -3.185885000 | 3.776240000  |
| 1 | -1.485416000 | -3.958878000 | 3.462237000  |
| 1 | -1.342158000 | -2.373672000 | 4.242055000  |
| 1 | -0.136064000 | -3.627326000 | 4.553276000  |
| 6 | 1.027307000  | -3.815929000 | 2.125215000  |
| 1 | 1.675404000  | -4.136916000 | 2.950176000  |
| 1 | 1.677333000  | -3.495372000 | 1.306996000  |
| 1 | 0.468976000  | -4.696729000 | 1.790318000  |
| 6 | -0.003869000 | 0.865693000  | 3.577483000  |
| 1 | -0.444037000 | -0.138225000 | 3.626930000  |
| 6 | -0.817551000 | 1.753796000  | 4.534068000  |
| 1 | -0.709938000 | 1.397728000  | 5.566377000  |
| 1 | -1.886556000 | 1.749128000  | 4.293316000  |
| 1 | -0.476411000 | 2.795870000  | 4.514123000  |
| 6 | 1.452037000  | 0.746221000  | 4.052594000  |
| 1 | 1.941047000  | 1.726489000  | 4.092328000  |
| 1 | 2.052684000  | 0.108371000  | 3.396600000  |
| 1 | 1.490404000  | 0.320140000  | 5.063024000  |
| 6 | 1.305565000  | 2.615694000  | 1.303867000  |

|   |              |              |              |
|---|--------------|--------------|--------------|
| 1 | 2.216147000  | 2.095850000  | 1.631469000  |
| 6 | 1.453013000  | 2.879852000  | -0.203992000 |
| 1 | 0.613894000  | 3.460032000  | -0.601249000 |
| 1 | 1.518124000  | 1.953144000  | -0.792248000 |
| 1 | 2.377159000  | 3.433729000  | -0.404528000 |
| 6 | 1.214811000  | 3.943751000  | 2.071750000  |
| 1 | 2.092201000  | 4.566503000  | 1.856792000  |
| 1 | 1.174451000  | 3.797982000  | 3.157241000  |
| 1 | 0.327514000  | 4.515722000  | 1.773866000  |
| 1 | -2.379577000 | -0.484239000 | 2.639816000  |

## 2 Experimental part

### 2.1 General experimental considerations

All experiments were performed under argon atmosphere using standard Schlenk methods or in MBraun glove boxes. THF, DCM, toluene, CH<sub>3</sub>CN and pentane were dried and purified over MBraun column systems. Benzene-d<sub>6</sub> and CDCl<sub>3</sub> were passed through a Pasteur pipette containing molecular sieves and basic alumina and then degassed via three freeze–pump–thaw cycles and stored over molecular sieves. [MCl(COD)]<sub>2</sub> (M = Rh, Ir)<sup>1, 2</sup> and [MCl{κ<sup>3</sup>(P,Si,Si)PPh(o-C<sub>6</sub>H<sub>4</sub>CH<sub>2</sub>Si<sup>i</sup>Pr<sub>2</sub>)<sub>2</sub>}] (M = Rh, **Rh-1** and M = Ir, **Ir-1**)<sup>31, 22, 3</sup> were synthesized according to reported procedures. The other reagents were purchased from Sigma Aldrich and used as received. Nuclear magnetic resonance (NMR) experiments were performed on Bruker Avance 300, 500 and 600 MHz spectrometer operating with frequency, deuterated solvent and temperature indicated in parentheses. Chemical shifts (δ) are reported in parts per million (ppm). GC-MS analyses were performed on a GC MS-QP2010S instrument equipped with a Rtx-5MS column (30.0 m x 0.25 mm x 0.25 μm).

### 2.2 Synthesis of [RhBr{κ<sup>3</sup>(P,Si,Si) PPh(o-C<sub>6</sub>H<sub>4</sub>CH<sub>2</sub>Si<sup>i</sup>Pr<sub>2</sub>)<sub>2</sub>}] (**Rh-2**)

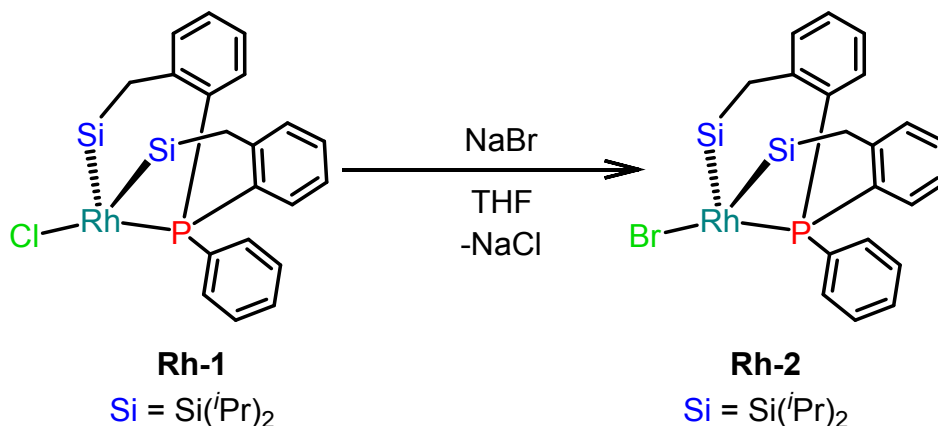

In a Schlenk flask, 30 mg (0.046 mmol) of **Rh-1** and 4.7 mg of NaBr (0.046 mmol) was dissolved in 2 mL of dry THF. The resulted yellow solution was left stirring for 24 hours. The solution was filter through celite and volatiles were removed under the vacuum, the crude was washed with 3 portions of 1 mL of dry pentane and dried in vacuum for 6 hours. Complex **Rh-2** was obtained as a yellow solid (30 mg, 93% yield). <sup>1</sup>H NMR (500 MHz, C<sub>6</sub>D<sub>6</sub>): δ 7.59 – 7.56 (m, 2H, CH<sub>arom</sub>), 7.00 (q, J<sub>HH</sub> 6.1 Hz, J<sub>HH</sub> 4.8Hz, 5H, CH<sub>arom</sub>), 6.94 – 6.89 (m, 4H, CH<sub>arom</sub>), 6.74 (t, J<sub>HH</sub> 7.4 Hz, 2H, CH<sub>arom</sub>), 2.24

(dd,  $J_{\text{HH}}$  14.7,  $J_{\text{HH}}$  5.9, 2H, CH<sub>2</sub>), 2.12 (d,  $J_{\text{HH}}$  14.6 Hz, 2H, CH<sub>2</sub>), 1.80 (sept,  $J_{\text{HH}}$  7.5 Hz, 2H, CH-*i*Pr), 1.70 (sept,  $J_{\text{HH}}$  7.3 Hz, 2H, CH-*i*Pr), 1.59 (d,  $J_{\text{HH}}$  7.4 Hz, 6H, CH<sub>3</sub>-*i*Pr), 1.16 (d,  $J_{\text{HH}}$  7.6 Hz, 6H, CH<sub>3</sub>-*i*Pr), 0.94 (dd,  $J_{\text{HH}}$  10 Hz,  $J_{\text{HH}}$  7.4 Hz, 12H, CH<sub>3</sub>-*i*Pr) ppm. **<sup>13</sup>C{<sup>1</sup>H} NMR (150.9 MHz, C<sub>6</sub>D<sub>6</sub>):** 146.69 (d,  $J_{\text{CP}}$  14.2 Hz,  $C_{\text{ipso}}$ ), 134.18 (d,  $J_{\text{CP}}$  11.1 Hz, CH<sub>arom</sub>), 132.45 (d,  $J_{\text{CP}}$  5.0 Hz, CH<sub>arom</sub>), 131.76 (d,  $J_{\text{CP}}$  8.1 Hz, CH<sub>arom</sub>), 131.19 (d,  $J_{\text{CP}}$  2.3 Hz, CH<sub>arom</sub>), 131.00 (d,  $J_{\text{CP}}$  2.1 Hz, CH<sub>arom</sub>), 130.53 (d,  $J_{\text{CP}}$  49.3 Hz,  $C_{\text{ipso}}$ ), 129.31 (d,  $J_{\text{CP}}$  10.0 Hz, CH<sub>arom</sub>), 126.84 (d,  $J_{\text{CP}}$  55.2 Hz,  $C_{\text{ipso}}$ ), 125.48 (d,  $J_{\text{CP}}$  8.4 Hz, CH<sub>arom</sub>), 23.40 (d,  $J_{\text{CP}}$  17.7 Hz, CH<sub>2</sub>), 21.65 (s, CH<sub>3</sub>-*i*Pr), 21.63 (s, CH-*i*Pr), 20.74 (s, CH<sub>3</sub>-*i*Pr), 20.10 (s, CH<sub>3</sub>-*i*Pr), 18.94 (s, CH<sub>3</sub>-*i*Pr), 18.88 (t, [ $J_{\text{CP}}$  +  $J_{\text{CRh}}$ ] 1.5 Hz, CH-*i*Pr) ppm. **<sup>31</sup>P{<sup>1</sup>H} NMR (202.46 MHz, C<sub>6</sub>D<sub>6</sub>):** 31.77 (d,  $J_{\text{PRh}}$  148.6,  $J_{\text{PSi}}$  13 Hz) ppm. **DEPT <sup>29</sup>Si{<sup>1</sup>H} NMR (99.36 MHz, C<sub>6</sub>D<sub>6</sub>):** 75.58 (dd,  $J_{\text{Si-Rh}}$  38.3,  $J_{\text{Si-P}}$  13 Hz) ppm. **Anal. Calcd for C<sub>32</sub>H<sub>45</sub>RhBrPSi<sub>2</sub>·0.67CH<sub>2</sub>Cl<sub>2</sub>:** C: 51.87%, H: 6.17%; Found: C:51.85%, H:6.43%.

### 2.3 Synthesis of [RhI{κ<sup>3</sup>(P,Si,Si) PPh(o-C<sub>6</sub>H<sub>4</sub>CH<sub>2</sub>Si<sup>*i*</sup>Pr<sub>2</sub>)<sub>2</sub>}] (**Rh-3**)

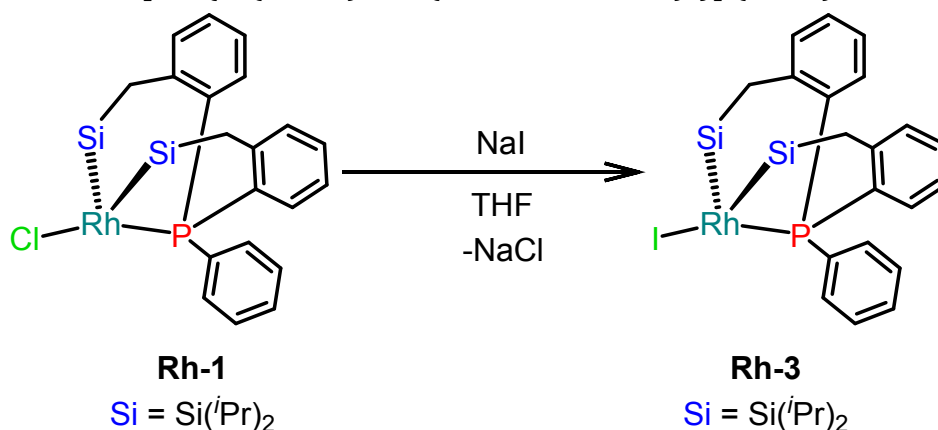

In a Schlenk flask, 30 mg (0.046 mmol) of **Rh-1** and 6.9 mg of NaI (0.046 mmol) was dissolved in 2 mL of dry THF. The resulted yellow solution was left stirring for 24 hours. The solution was filter through celite and volatiles were removed under the vacuum, the crude was washed with 3 portions of 1 mL of dry pentane and dried in vacuum for 6 hours. Complex **Rh-3** was obtained as a pale-yellow solid (32 mg, 94% yield). **<sup>1</sup>H NMR (500 MHz, C<sub>6</sub>D<sub>6</sub>):** δ 7.63 – 7.54 (m, 2H, CH<sub>arom</sub>), 7.04 – 6.89 (m, 9H, CH<sub>arom</sub>), 6.78 – 6.70 (m, 2H, CH<sub>arom</sub>), 2.22 (ddd,  $J_{\text{HH}}$  14.8,  $J_{\text{HH}}$  6.9,  $J_{\text{HP}}$  1.9 Hz, 2H, CH<sub>2</sub>), 2.12 (d,  $J_{\text{HH}}$  14.7 Hz, 2H, CH<sub>2</sub>), 1.82 – 1.66 (m, 4H, CH-*i*Pr), 1.59 (d,  $J_{\text{HH}}$  7.4 Hz, 6H, CH<sub>3</sub>-*i*Pr), 1.21 (d,  $J_{\text{HH}}$  7.7 Hz, 6H, CH<sub>3</sub>-*i*Pr), 0.93 (d,  $J_{\text{HH}}$  7.4 Hz, 6H, CH<sub>3</sub>-*i*Pr), 0.87 (d,  $J_{\text{HH}}$  7.5 Hz, 6H, CH<sub>3</sub>-*i*Pr)

ppm.  $^{13}\text{C}\{^1\text{H}\}$  NMR (150.9 MHz,  $\text{C}_6\text{D}_6$ ): 146.77 (d,  $J_{\text{CP}}$  14.4 Hz,  $C_{\text{ipso}}$ ), 133.90 (d,  $J_{\text{CP}}$  10.8 Hz,  $\text{CH}_{\text{arom}}$ ), 132.66 (d,  $J_{\text{CP}}$  4.9 Hz,  $\text{CH}_{\text{arom}}$ ), 131.85 (d,  $J_{\text{CP}}$  8.1 Hz,  $\text{CH}_{\text{arom}}$ ), 131.18 (d,  $J_{\text{CP}}$  2.5 Hz,  $\text{CH}_{\text{arom}}$ ), 130.90 (d,  $J_{\text{CP}}$  2.7 Hz,  $\text{CH}_{\text{arom}}$ ), 129.82 (d,  $J_{\text{CP}}$  48.8 Hz,  $C_{\text{ipso}}$ ), 129.26 (d,  $J_{\text{CP}}$  10.0 Hz,  $\text{CH}_{\text{arom}}$ ), 126.47 (d,  $J_{\text{CP}}$  55.1 Hz,  $C_{\text{ipso}}$ ), 125.49 (d,  $J_{\text{CP}}$  8.2 Hz,  $\text{CH}_{\text{arom}}$ ), 23.54 (d,  $J_{\text{CP}}$  18.4 Hz,  $\text{CH}_2$ ), 22.41 (s,  $\text{CH}_3$ - $^i\text{Pr}$ ), 21.20 (s,  $\text{CH}$ - $^i\text{Pr}$ ), 20.82 (s,  $\text{CH}_3$ - $^i\text{Pr}$ ), 19.99 (s,  $\text{CH}_3$ - $^i\text{Pr}$ ), 19.35 (t, [ $J_{\text{CP}}$  +  $J_{\text{CRh}}$ ] 1.9 Hz,  $\text{CH}$ - $^i\text{Pr}$ ), 19.02 (s,  $\text{CH}_3$ - $^i\text{Pr}$ ) ppm.  $^{31}\text{P}\{^1\text{H}\}$  NMR (202.46 MHz,  $\text{C}_6\text{D}_6$ ): 30.90 (d,  $J_{\text{PRh}}$  147.4,  $J_{\text{PSi}}$  12 Hz) ppm. DEPT  $^{29}\text{Si}\{^1\text{H}\}$  NMR (99.36 MHz,  $\text{C}_6\text{D}_6$ ): 75.77 (dd,  $J_{\text{Si-Rh}}$  37.0,  $J_{\text{Si-P}}$  12 Hz) ppm. Anal. Calcd for  $\text{C}_{32}\text{H}_{45}\text{RhIPSi}_2$ : C: 51.48%, H: 6.07%; Found: C: 51.79%, H: 6.22%.

## 2.4 Synthesis of $[\text{Rh}(\text{OTf})\{\kappa^3(\text{P},\text{Si},\text{Si})\text{PPh}(\text{o}-\text{C}_6\text{H}_4\text{CH}_2\text{Si}^i\text{Pr}_2)_2\}]$ (**Rh-4**)

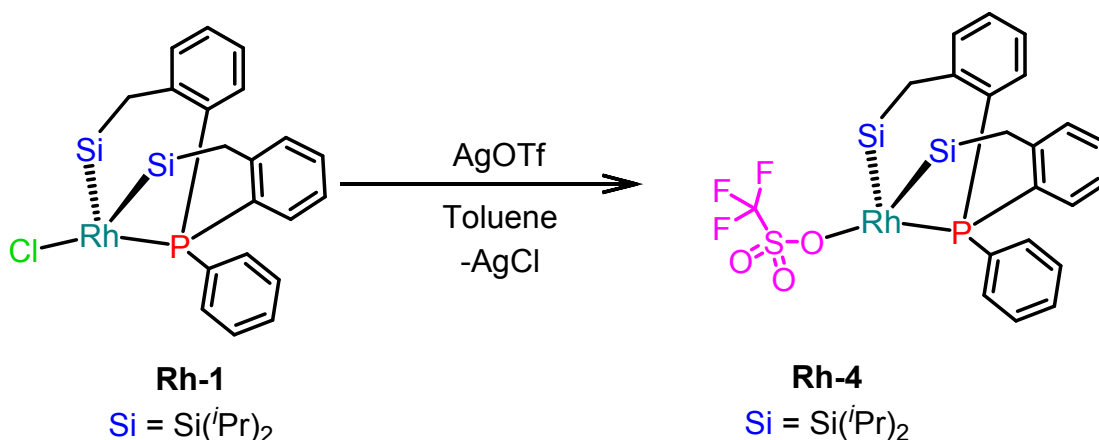

In a Schlenk flask, 30 mg (0.046 mmol) of **Rh-1** and 23.5 mg of AgOTf (0.092 mmol) was dissolved in 2 mL of dry Toluene. The resulted brown solution was left stirring for 24 hours in dark. The solution was filter through celite and volatiles were removed under the vacuum, the crude was washed with 3 portions of 1 mL of dry pentane and dried in vacuum for 6 hours. Complex **Rh-4** was obtained as a orange viscous compound (29 mg, 82% yield).  $^1\text{H}$  NMR (500 MHz,  $\text{C}_6\text{D}_6$ ):  $\delta$  7.64 (ddd,  $J_{\text{HH}} = 11.3$  Hz,  $J_{\text{HH}} = 7.9$  Hz,  $J_{\text{HP}} = 1.6$  Hz 2H,  $\text{CH}_{\text{arom}}$ ), 7.09 – 7.03 (m, 3H,  $\text{CH}_{\text{arom}}$ ), 6.98 – 6.82 (m, 6H,  $\text{CH}_{\text{arom}}$ ), 6.70 (tt,  $J_{\text{HH}} = 7.4$  Hz,  $J_{\text{HP}} = 1.6$  Hz 2H,  $\text{CH}_{\text{arom}}$ ), 2.25 (ddd,  $J_{\text{HH}} = 15.2$ ,  $J_{\text{HH}} = 5.8$ ,  $J_{\text{HP}} = 2.5$  2H,  $\text{CH}_2$ ), 2.05 (d,  $J_{\text{HH}} = 15.2$  Hz, 2H,  $\text{CH}_2$ ), 1.83(sept,  $J_{\text{HH}} = 7.5$  Hz, 2H,  $\text{CH}$ - $^i\text{Pr}$ ), 1.65 (sept,  $J_{\text{HH}}$

= 7.7 Hz, 2H, CH-*i*Pr), 1.45 (d,  $J_{\text{HH}} = 7.5$  Hz, 6H, CH<sub>3</sub>-*i*Pr), 1.08 (d,  $J_{\text{HH}} = 7.3$  Hz, 6H, CH<sub>3</sub>-*i*Pr), 0.94 (pseudo dd,  $J_{\text{HH}} = 7.5$  Hz,  $J_{\text{HH}} = 4.7$  Hz, 12H, CH<sub>3</sub>-*i*Pr) ppm. **<sup>13</sup>C{<sup>1</sup>H} NMR (125.76 MHz, C<sub>6</sub>D<sub>6</sub>):** 145.83 (d,  $J_{\text{CP}} 13.5$  Hz,  $C_{\text{ipso}}$ ), 134.44 (d,  $J_{\text{CP}} 10.8$  Hz, CH<sub>arom</sub>), 132.76 (d,  $J_{\text{CP}} 5.9$  Hz, CH<sub>arom</sub>), 131.99 (d,  $J_{\text{CP}} 8.4$  Hz, CH<sub>arom</sub>), 131.75 (dd,  $J_{\text{CP}} 6.2, 2.6$  Hz, CH<sub>arom</sub>), 129.61 (d,  $J_{\text{CP}} = 10.6$  Hz, CH<sub>arom</sub>), 126.17 (d,  $J_{\text{CP}} 60.3$  Hz,  $C_{\text{ipso}}$ ), 125.68 (d,  $J_{\text{CP}} 2.1$  Hz, CH<sub>arom</sub>), 21.83 (d,  $J_{\text{CP}} 14.6$  Hz, CH<sub>2</sub>), 21.57 (s, CH<sub>3</sub>-*i*Pr), 20.73 (s, CH-*i*Pr), 19.09 (s, CH<sub>3</sub>-*i*Pr), 18.67 (s, CH<sub>3</sub>-*i*Pr), 18.18 (s, CH<sub>3</sub>-*i*Pr), 17.00 (t, [ $J_{\text{CP}} + J_{\text{CRh}}$ ] 1.5 Hz, CH-*i*Pr) ppm. **<sup>31</sup>P{<sup>1</sup>H} NMR (202.46 MHz, C<sub>6</sub>D<sub>6</sub>):** 37.67 (d,  $J_{\text{PRh}} 169.5, J_{\text{PSi}} 15$  Hz) ppm. **DEPT <sup>29</sup>Si{<sup>1</sup>H} NMR (99.36 MHz, C<sub>6</sub>D<sub>6</sub>):** 73.82 (dd,  $J_{\text{Si-Rh}} 38.4, J_{\text{Si-P}} 15$  Hz) ppm.

## 2.5 Synthesis of [Rh{κ<sup>3</sup>(*P,Si,Si*) PPh(o-C<sub>6</sub>H<sub>4</sub>CH<sub>2</sub>Si<sup>*i*</sup>Pr<sub>2</sub>)<sub>2</sub>}Cl·GaCl<sub>3</sub>] (**Rh-5**)

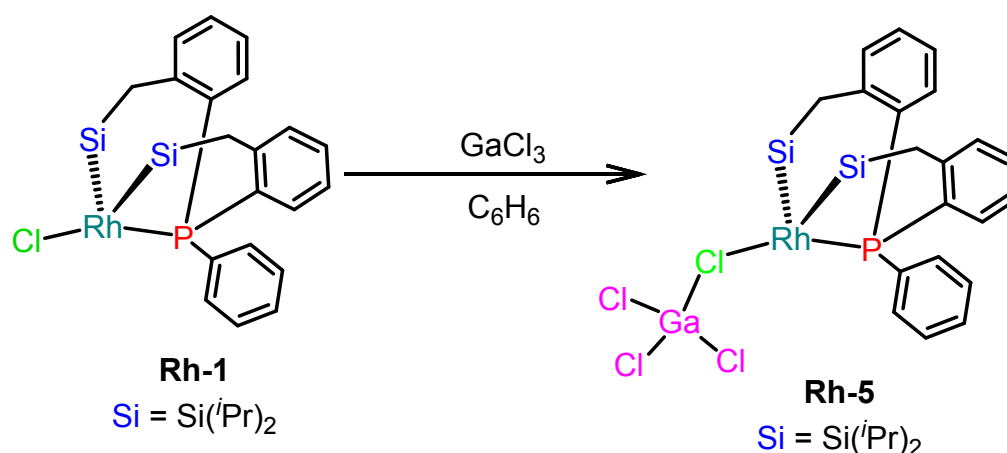

In a Schlenk flask, 30 mg (0.046 mmol) of **Rh-1** and 8.1 mg of GaCl<sub>3</sub> (0.046 mmol) was dissolved in 2 mL of dry benzene. The resulted yellow solution was left stirring for 24 hours. The volatiles were removed under the vacuum; the crude was washed with 3 portions of 1 mL of dry pentane and dried in vacuum for 6 hours. Complex **Rh-5** was obtained as a yellow-brown solid (29 mg, 75% yield). **<sup>1</sup>H NMR (500 MHz, CDCl<sub>3</sub>):** δ 7.50 – 7.36 (m, 4H, CH<sub>arom</sub>), 7.33 (t,  $J_{\text{HH}} 7.6$  Hz, 2H, CH<sub>arom</sub>), 7.22 (t,  $J_{\text{HH}} 6.4$  Hz, 2H, CH<sub>arom</sub>), 7.15 (s, 1H, CH<sub>arom</sub>), 7.05 (t,  $J_{\text{HH}} 7.7$  Hz, 2H, CH<sub>arom</sub>), 2.21 (dd,  $J_{\text{HH}} 15.0, J_{\text{HH}} 4.7$ , 2H, CH<sub>2</sub>), 2.06 (d,  $J_{\text{HH}} 14.8$  Hz, 2H, CH<sub>2</sub>), 1.60 (sept,  $J_{\text{HH}} 7.5$  Hz, 2H, CH-*i*Pr), 1.30 (sept,  $J_{\text{HH}} 7.3$  Hz, 2H, CH-*i*Pr), 1.11 (d,  $J_{\text{HH}} 7.3$  Hz, 6H, CH<sub>3</sub>-*i*Pr), 0.92 (d,  $J_{\text{HH}} 7.4$  Hz, 6H, CH<sub>3</sub>-*i*Pr), 0.84 (d,  $J_{\text{HH}} 7.2$  Hz, 6H, CH<sub>3</sub>-*i*Pr), 0.67 (d,  $J_{\text{HH}} 7.3$  Hz, 6H, CH<sub>3</sub>-*i*Pr) ppm. **<sup>13</sup>C{<sup>1</sup>H} NMR (125.758 MHz, CDCl<sub>3</sub>):**

145.89 (d,  $J_{CP}$  13.1 Hz,  $C_{ipso}$ ), 134.65 (d,  $J_{CP}$  10.9 Hz,  $CH_{arom}$ ), 132.64 (d,  $J_{CP}$  = 5.8 Hz,  $CH_{arom}$ ), 131.75 (d,  $J_{CP}$  8.4 Hz,  $CH_{arom}$ ), 129.65 (d,  $J_{CP}$  10.7 Hz,  $CH_{arom}$ ), 127.36 (d,  $J_{CP}$  53.2 Hz,  $C_{ipso}$ ), 125.89 (d,  $J_{CP}$  9.3 Hz,  $CH_{arom}$ ), 125.04 (d,  $J_{CP}$  60.0 Hz,  $C_{ipso}$ ), 21.95 (s,  $CH_3$ - $iPr$ ), 21.88 (d,  $J_{CP}$  12.4 Hz,  $CH_2$ ), 20.75 (s,  $CH$ - $iPr$ ), 19.91 (s,  $CH_3$ - $iPr$ ), 19.89 (s,  $CH_3$ - $iPr$ ), 18.96 (s,  $CH_3$ - $iPr$ ), 18.21 (t, [ $J_{CP}$  +  $J_{CRh}$ ] 1.8 Hz,  $CH$ - $iPr$ ) ppm.  $^{31}P\{^1H\}$  NMR (202.46 MHz,  $CDCl_3$ ): 34.80 (d,  $J_{PRh}$  177.6) ppm. DEPT  $^{29}Si\{^1H\}$  NMR (99.36 MHz,  $CDCl_3$ ): 78.42 (dd,  $J_{Si-Rh}$  37.3,  $J_{Si-P}$  12.6 Hz) ppm. **Anal. Calcd for  $C_{32}H_{45}Cl_4GaRhPSi_2 \cdot 0.37CDCl_3$ :** C: 44.39%, H: 5.26%; Found: C:44.45%, H:5.33%.

### 3 Characterization of new complexes

#### 3.1 Characterization of $[RhBr\{\kappa^3(P,Si,Si)PPh(o-C_6H_4CH_2Si^iPr_2)_2\}]$ (Rh-2)

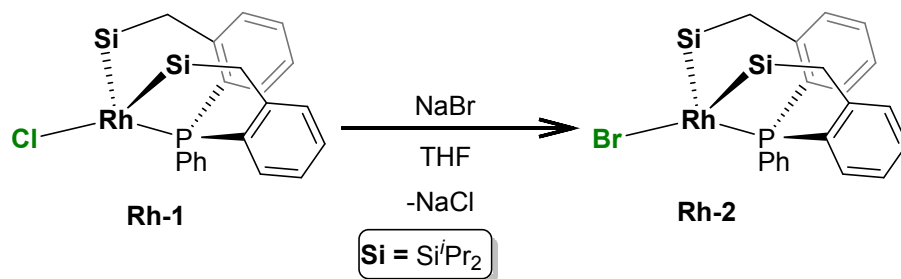

#### NMR spectra of Rh-2

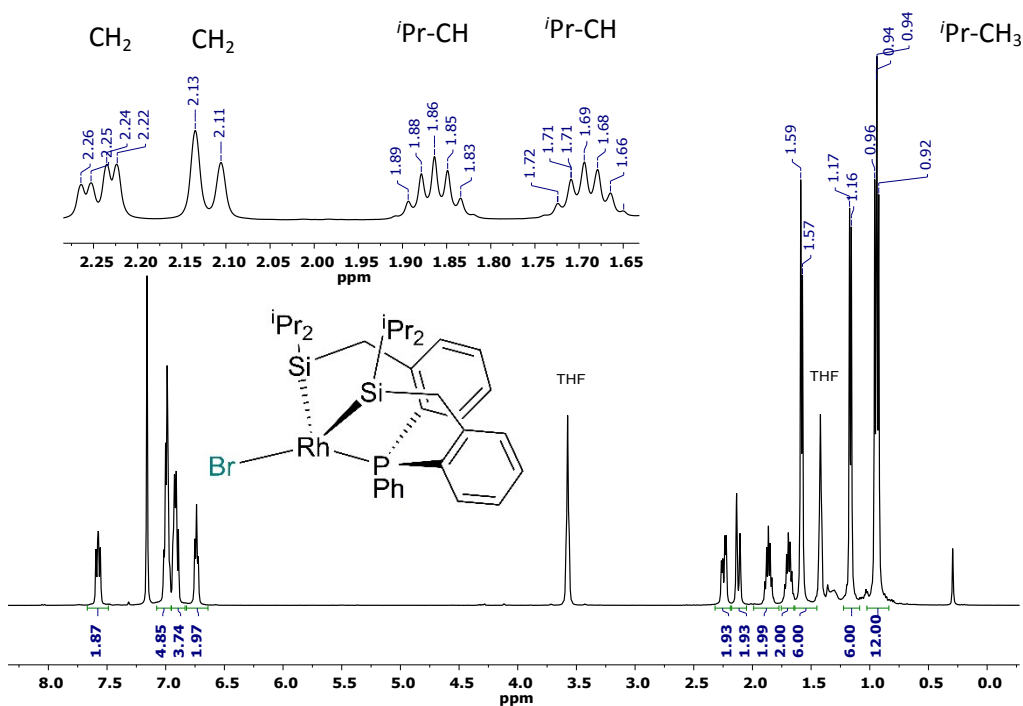

Figure S1.  $^1H$  NMR spectrum (500 MHz,  $C_6D_6$ , 293 K) of Rh-2

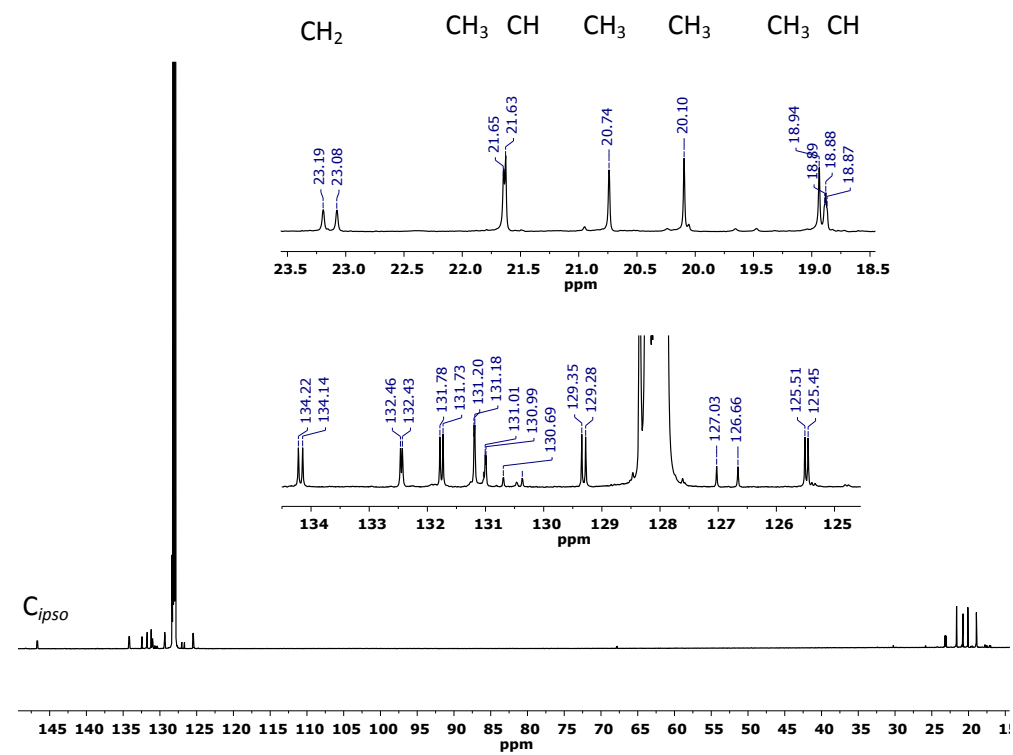

Figure S2. <sup>13</sup>C{<sup>1</sup>H} NMR spectrum (150.9 MHz, C<sub>6</sub>D<sub>6</sub>, 293 K) of Rh-2

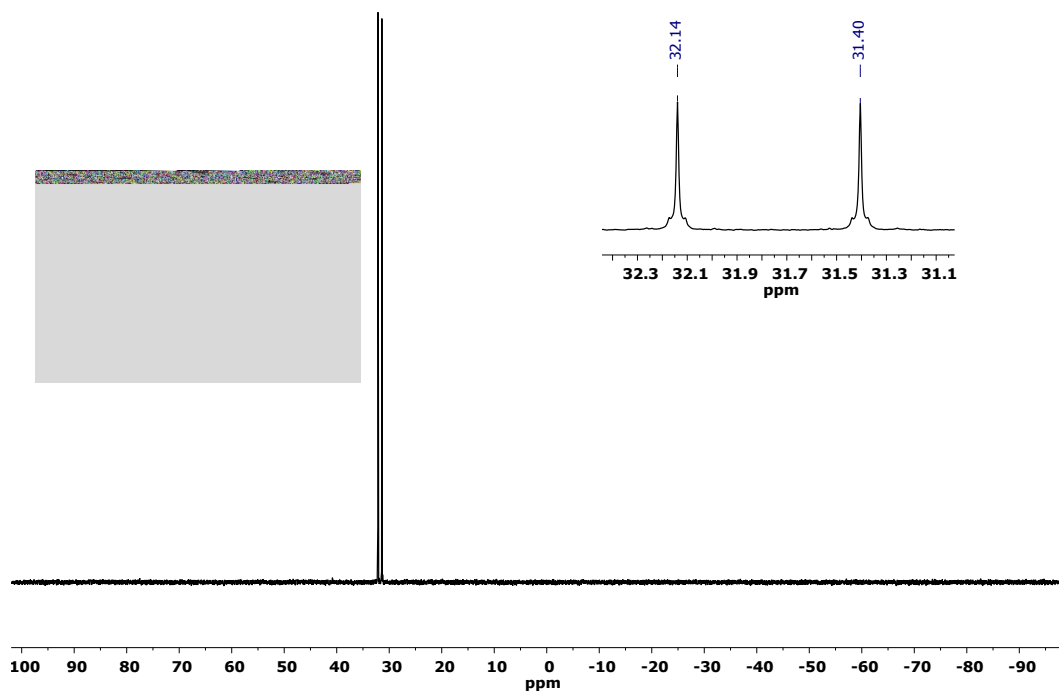

Figure S3. <sup>31</sup>P{<sup>1</sup>H} NMR spectrum (202.46 MHz, C<sub>6</sub>D<sub>6</sub>, 293 K) of Rh-2.



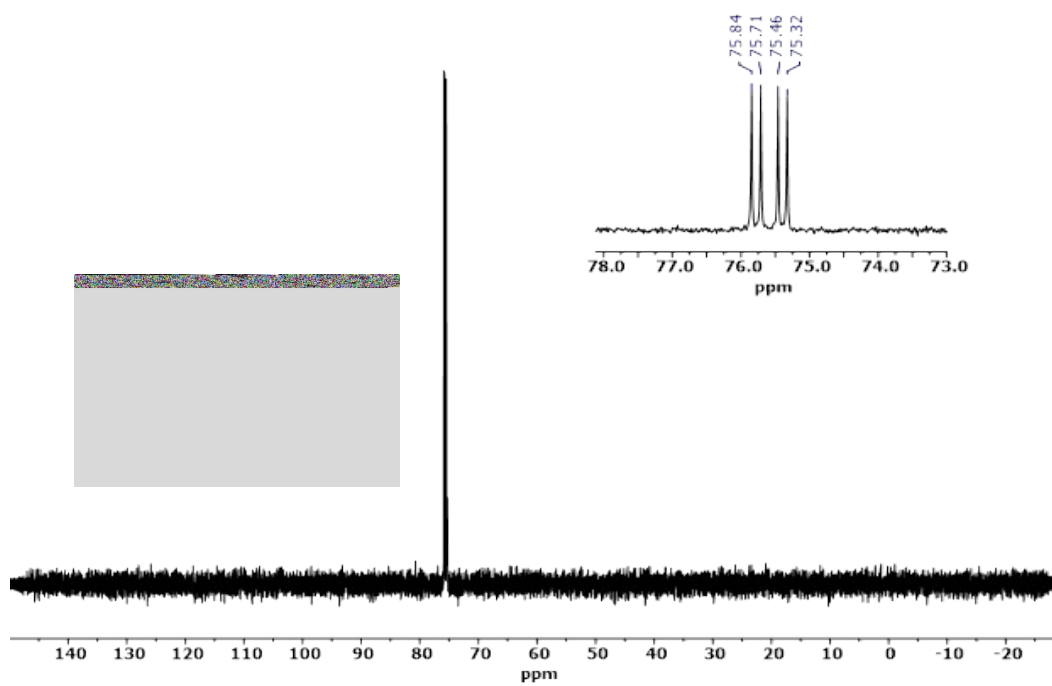

**Figure S4.**  $^{29}\text{Si}\{^1\text{H}\}$  DEPT NMR spectrum (99.36 MHz,  $\text{C}_6\text{D}_6$ , 293 K) of **Rh-2**.

### 3.2 Characterization of $[\text{RhI}\{\kappa^3(\text{P},\text{Si},\text{Si})\text{PPh}(\text{o}-\text{C}_6\text{H}_4\text{CH}_2\text{Si}^i\text{Pr}_2)_2\}]$ (**Rh-3**)

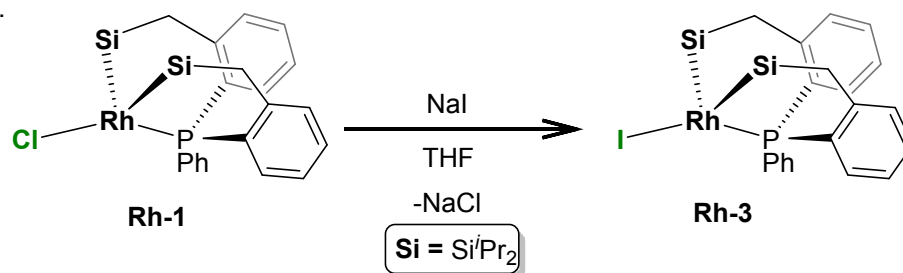

#### NMR spectra of **Rh-3**

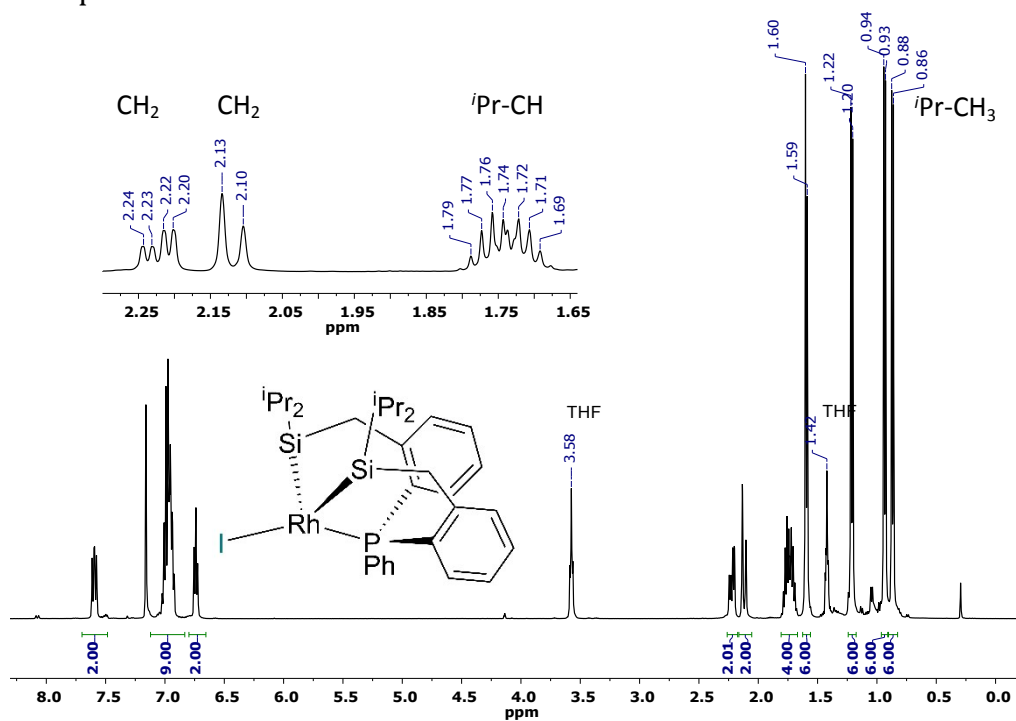

Figure S5.  $^1\text{H}$  NMR spectrum (500 MHz,  $\text{C}_6\text{D}_6$ , 293 K) of **Rh-3**.

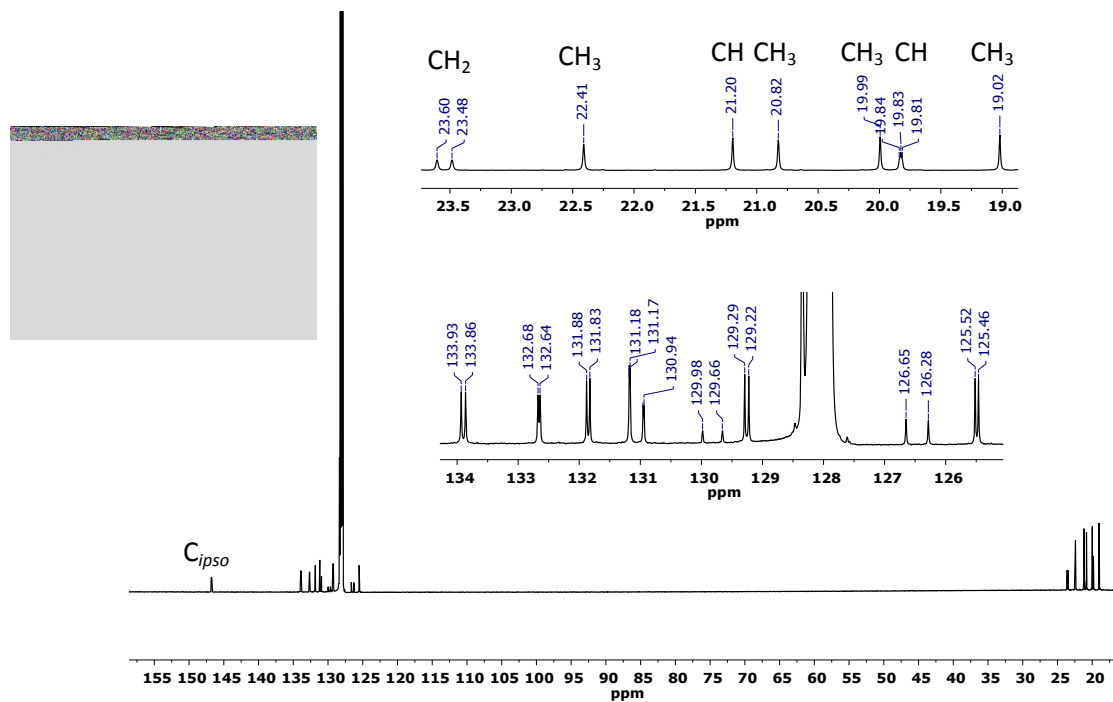

Figure S6.  $^{13}\text{C}\{^1\text{H}\}$  NMR spectrum (150.9 MHz,  $\text{C}_6\text{D}_6$ , 293 K) of Rh-3.

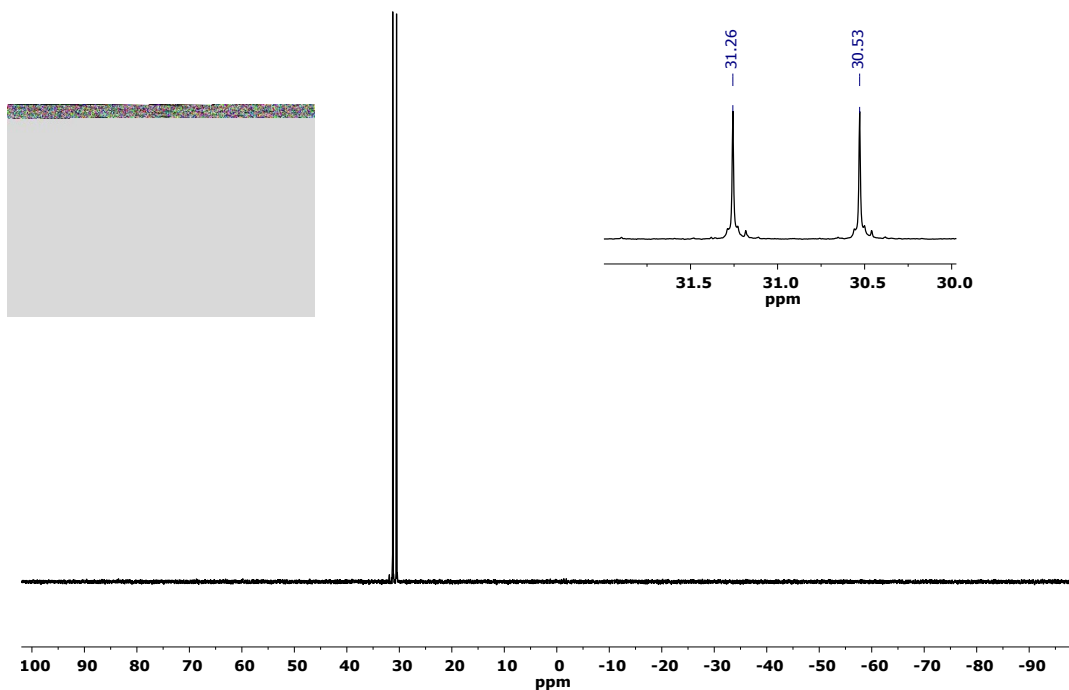

Figure S7.  $^{31}\text{P}\{^1\text{H}\}$  NMR spectrum (202.46 MHz,  $\text{C}_6\text{D}_6$ , 293 K) of Rh-3.

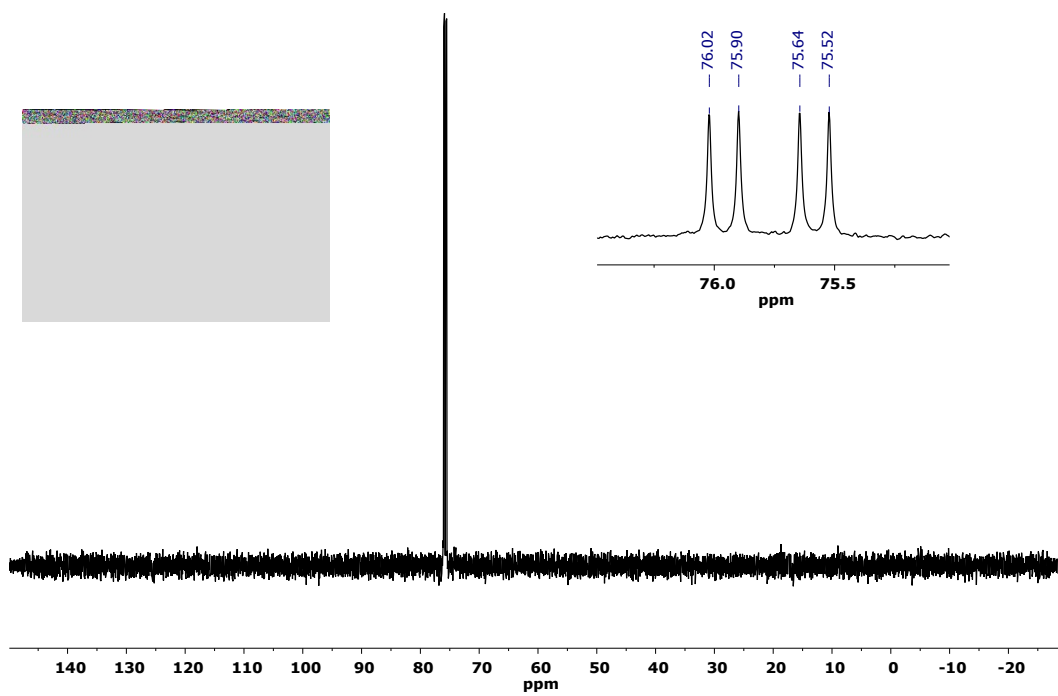

**Figure S8.**  $^{29}\text{Si}\{^1\text{H}\}$  DEPT NMR spectrum (99.36 MHz,  $\text{C}_6\text{D}_6$ , 293 K) of **Rh-3**.

### 3.3 Characterization of [RhOTf{ $\kappa^3(P,Si,Si)$ PPh(o-C<sub>6</sub>H<sub>4</sub>CH<sub>2</sub>Si<sup>*i*</sup>Pr<sub>2</sub>)<sub>2</sub>}] (**Rh-4**)

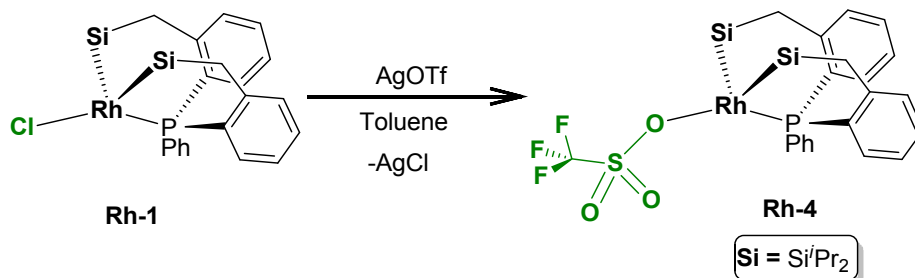

NMR spectra of Rh-4

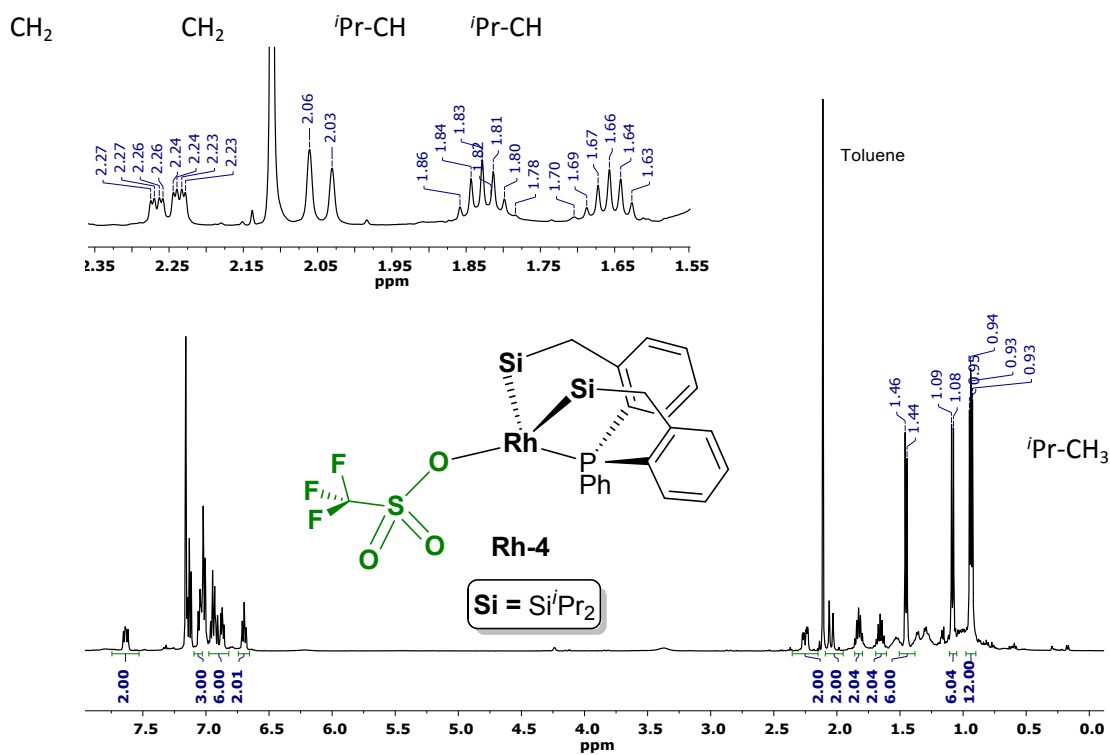

Figure S9. <sup>1</sup>H NMR spectrum (500 MHz, C<sub>6</sub>D<sub>6</sub>, 293 K) of Rh-4

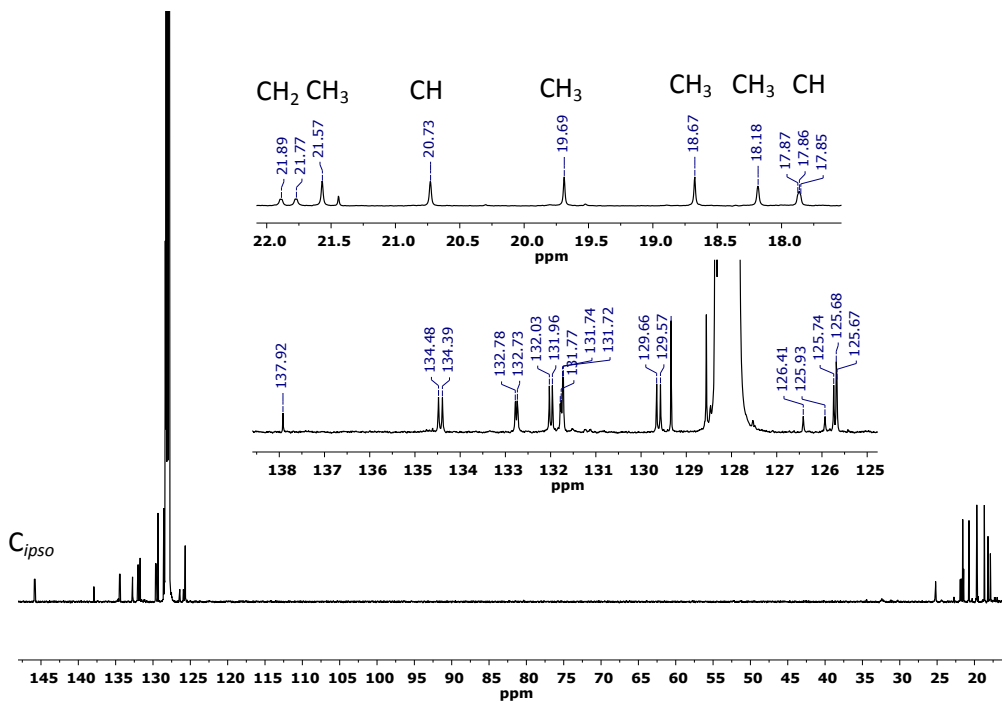

**Figure S10.**  $^{13}\text{C}\{^1\text{H}\}$  NMR spectrum (125.76 MHz,  $\text{C}_6\text{D}_6$ , 293 K) of Rh-4

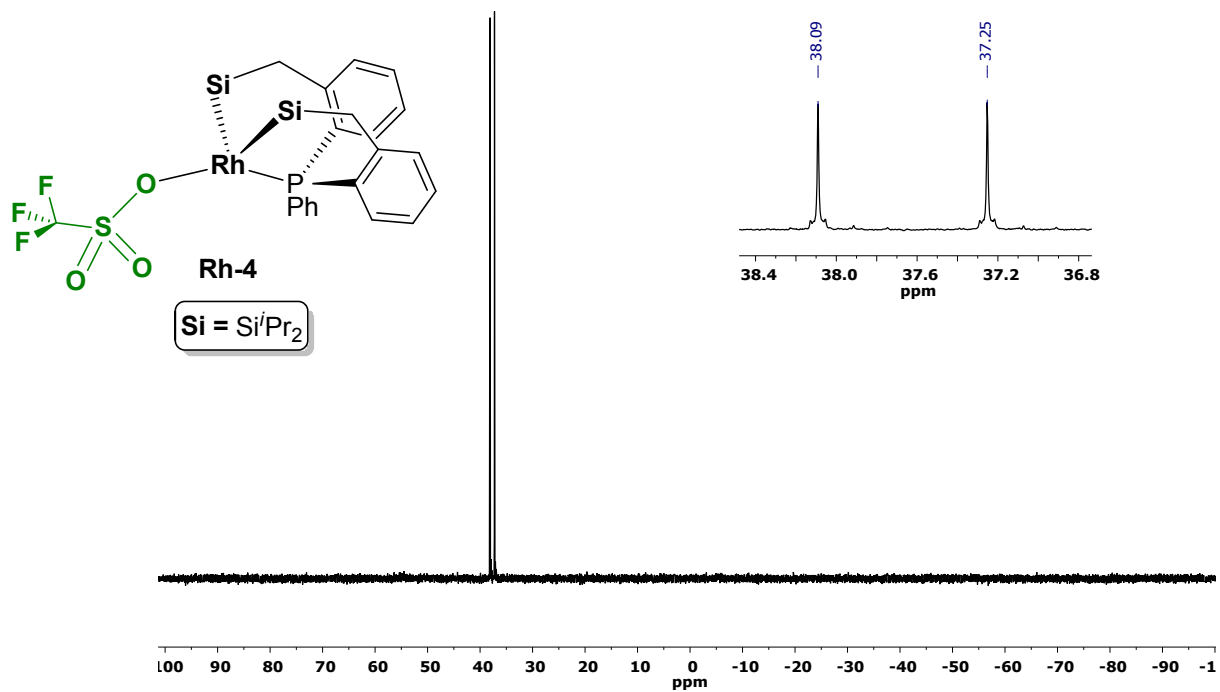

Figure S11.  $^{31}\text{P}\{^1\text{H}\}$  NMR spectrum (202.46 MHz,  $\text{C}_6\text{D}_6$ , 293 K) of Rh-4

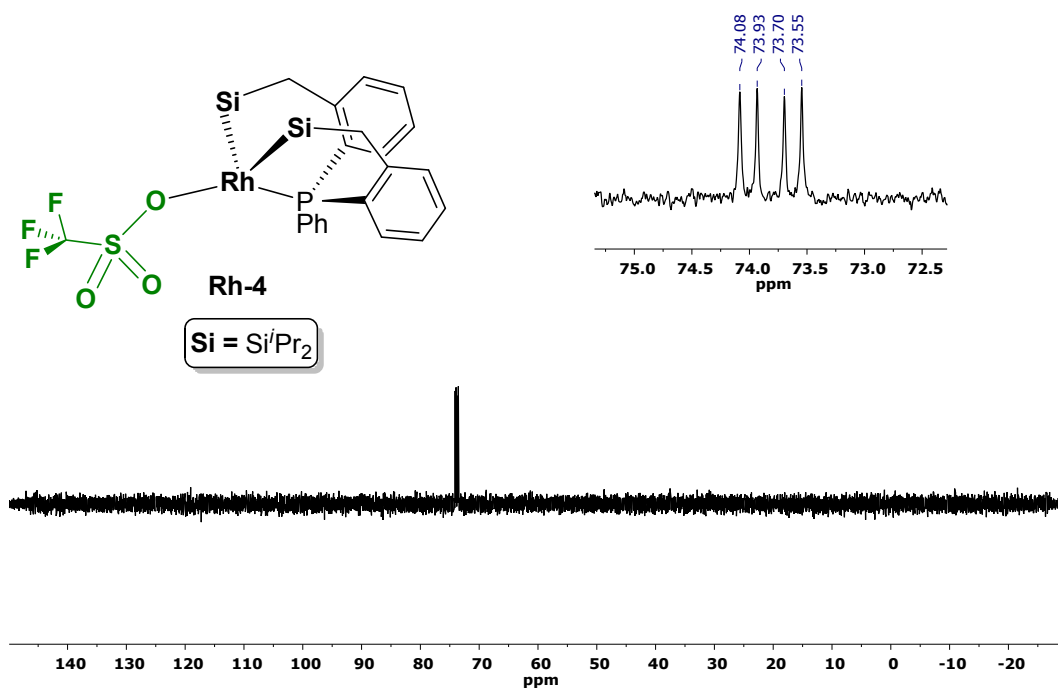

Figure S12.  $^{29}\text{Si}\{^1\text{H}\}$  DEPT NMR spectrum (99.36 MHz,  $\text{C}_6\text{D}_6$ , 293 K) of Rh-4



### 3.4 Synthesis of $[\text{RhCl}\{\kappa^3(\text{P},\text{Si},\text{Si})\text{PPh}(\text{o}-\text{C}_6\text{H}_4\text{CH}_2\text{Si}^i\text{Pr}_2)_2\}\text{GaCl}_3]$ (**Rh-5**)

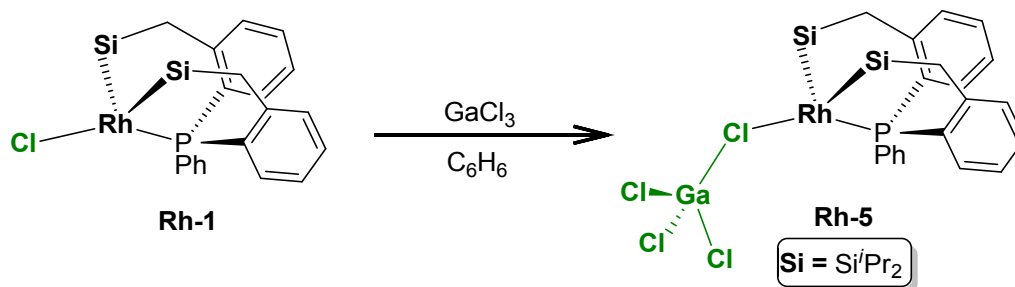

#### NMR spectra of **Rh-5**

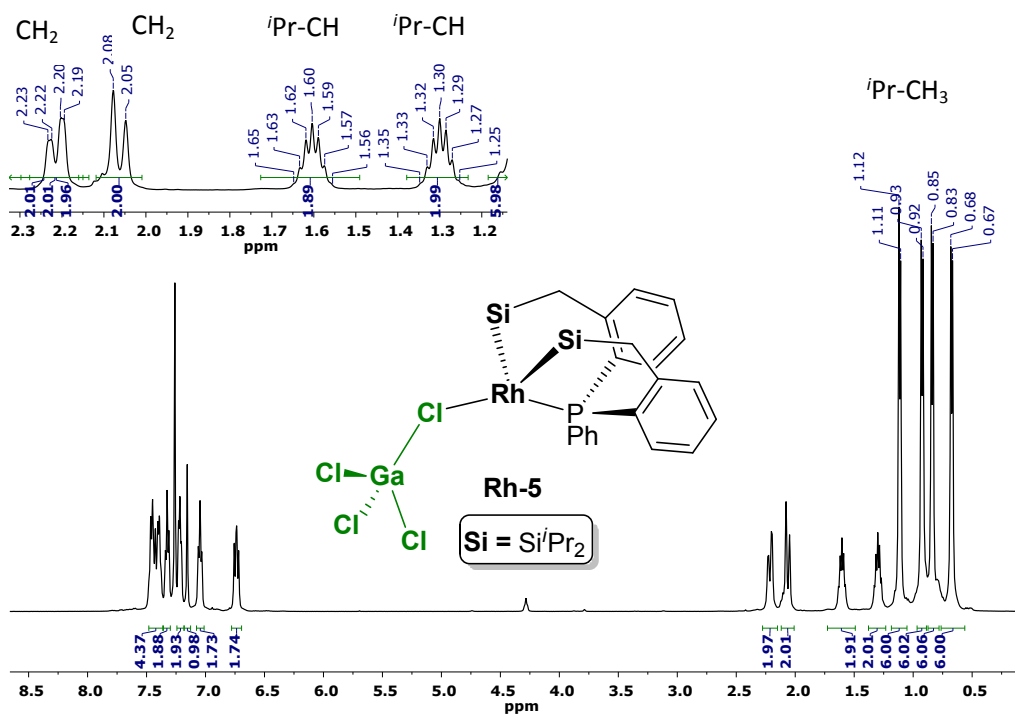

Figure S13.  $^1\text{H}$  NMR spectrum (500 MHz,  $\text{CDCl}_3$ , 293 K) of **Rh-5**

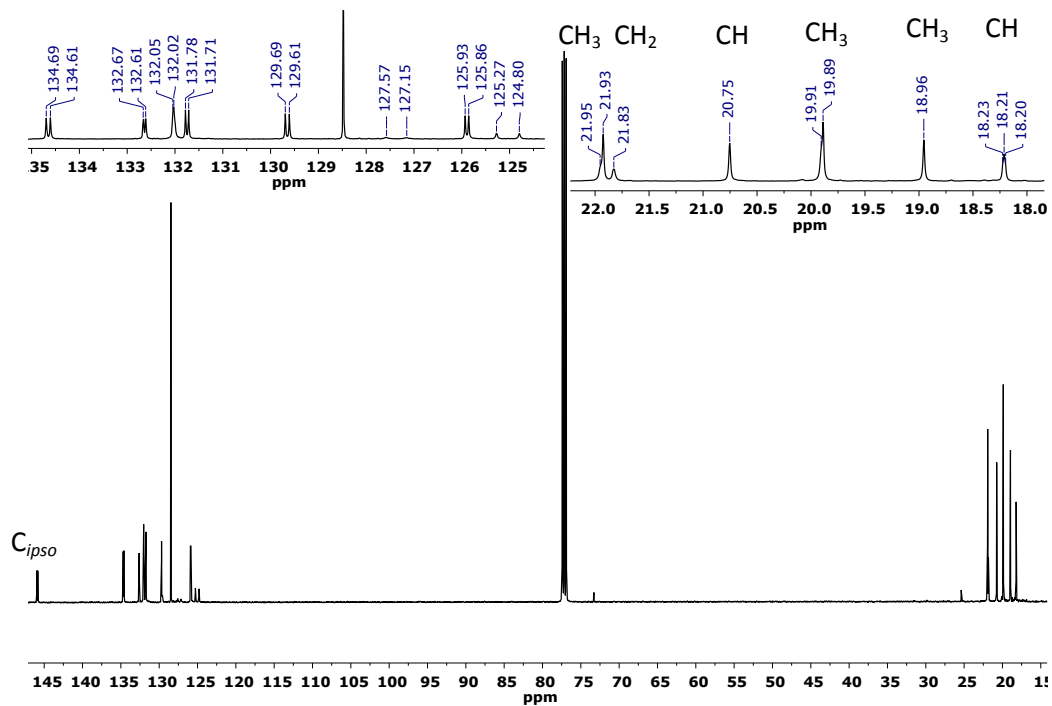

Figure S14.  $^{13}\text{C}\{^1\text{H}\}$  NMR spectrum (125.76 MHz,  $\text{CDCl}_3$ , 293 K) of Rh-5

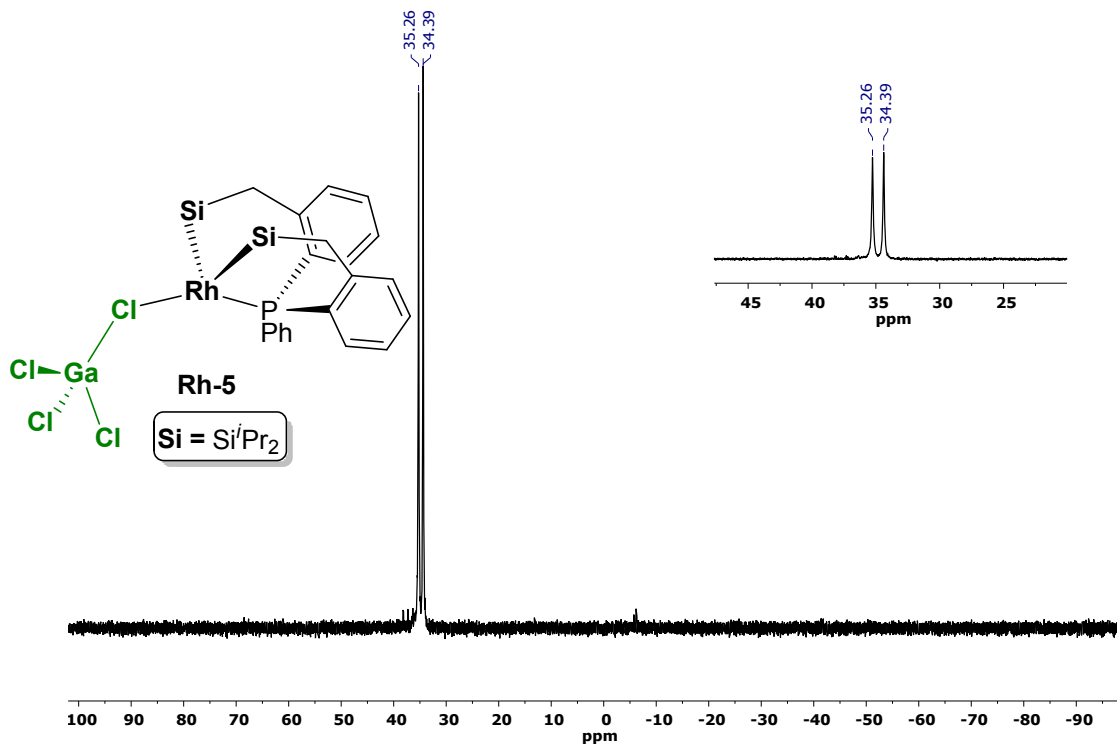

Figure S15.  $^{31}\text{P}\{^1\text{H}\}$  NMR spectrum (202.46 MHz,  $\text{CDCl}_3$ , 293 K) of Rh-5

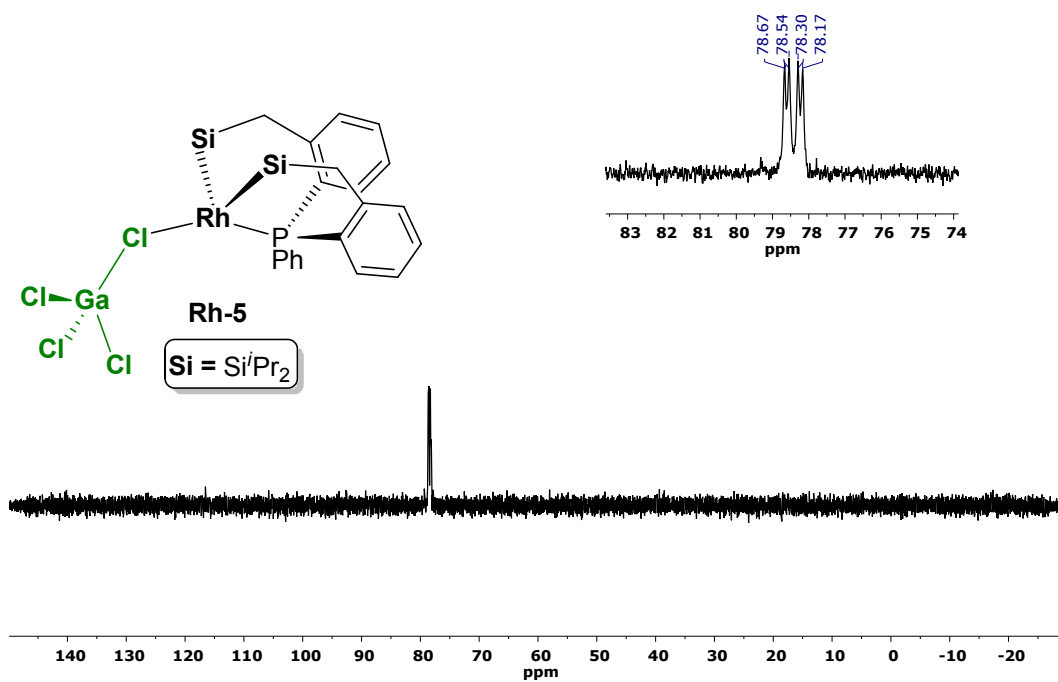

**Figure S16.**  $^{29}\text{Si}\{^1\text{H}\}$  DEPT NMR spectrum (99.36 MHz,  $\text{CDCl}_3$ , 293 K) of **Rh-5**

### 3.5 Reaction of **Rh-1** and styrene *in situ* in an NMR tube

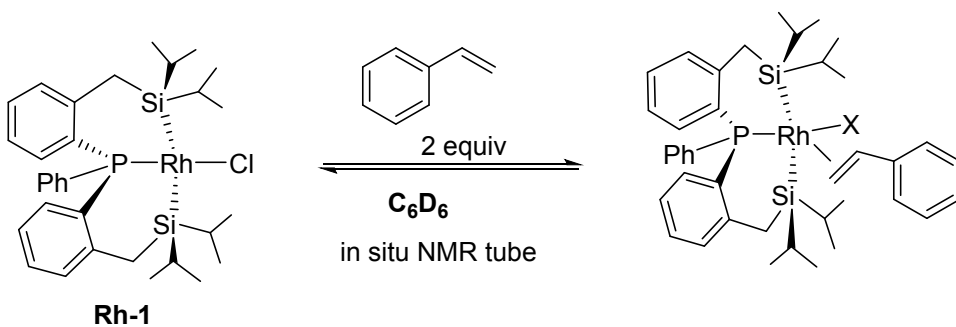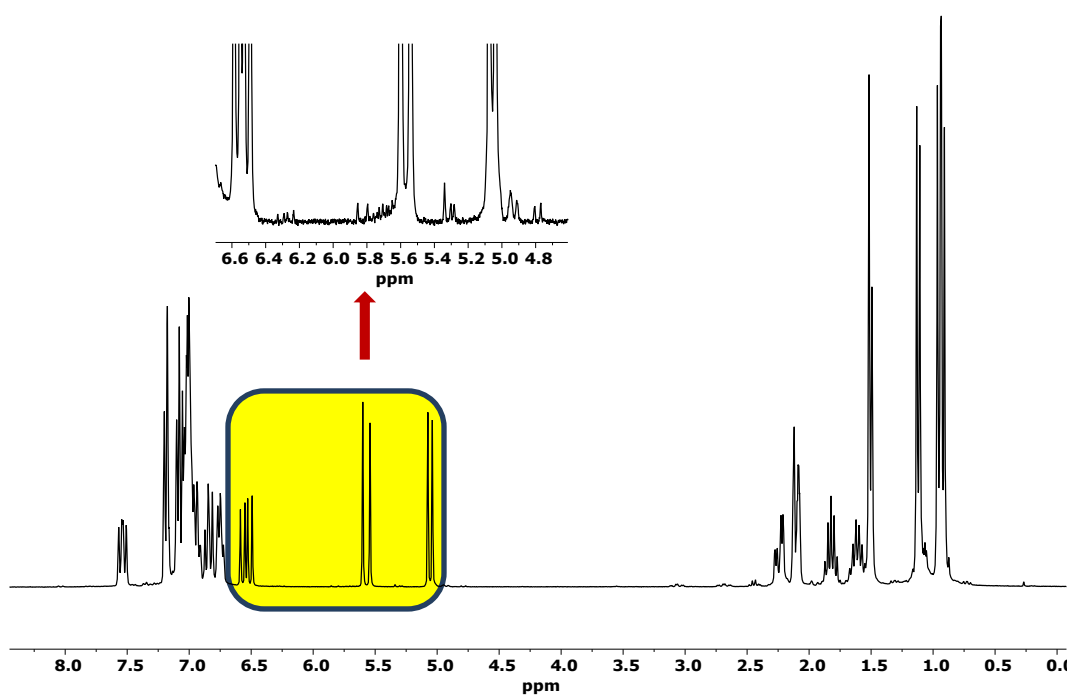

**Figure S17.** The *in situ*  $^1H$  NMR spectrum (300 MHz, Tol- $d_8$ , 298 K) of the reaction mixture of Rh-1 and 2 equivalents of styrene.

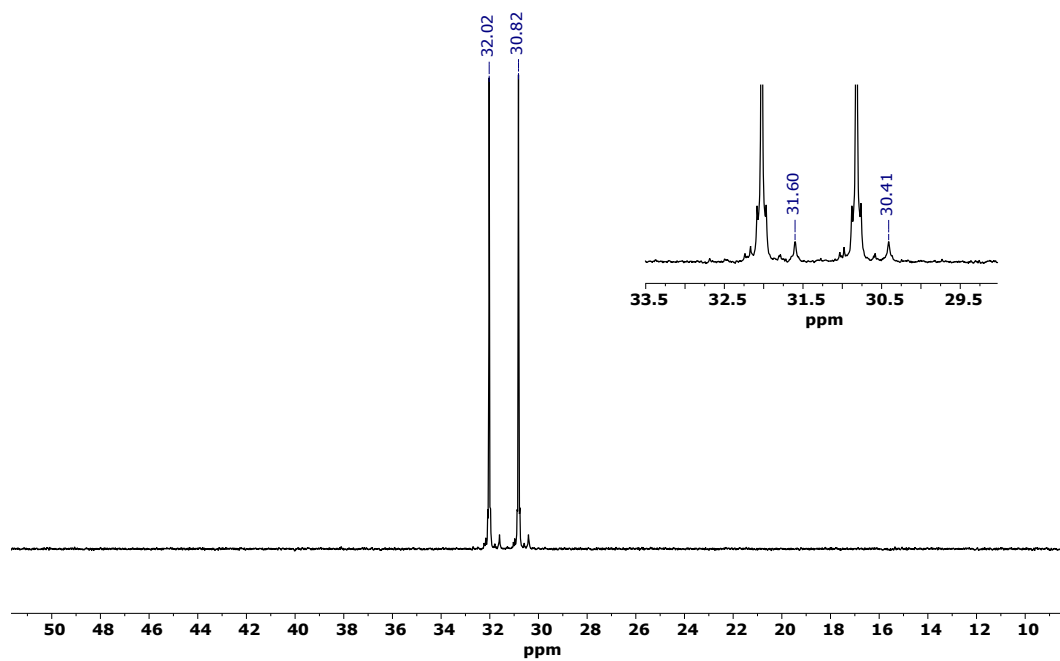

**Figure S18.** The *in situ*  $^{31}\text{P}\{^1\text{H}\}$  NMR spectrum (121.5 MHz, Tol- $d_8$ , 298 K) of the reaction mixture of **Rh-1** and 2 equivalents of styrene.

### 3.6 Optimization of the catalytic dehydrogenative silylation conditions of styrene by Rhodium and Iridium complexes

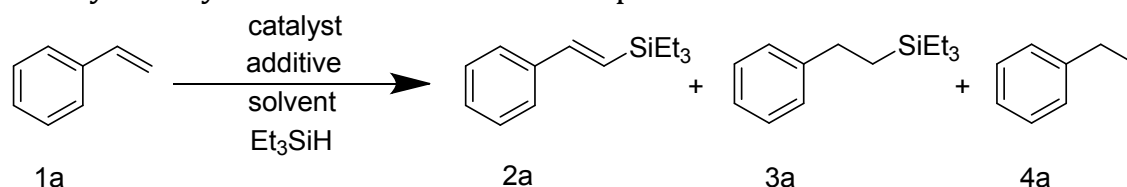

Table S3. Optimization of Dehydrogenative silylation of styrene with  $\text{Et}_3\text{SiH}$  by Rh Complexes.

| Entry | Catalyst          | Additive               | Solvent                  | T(°C) | t(h) | Conversion (%) | 2a   | 3a   | 4a   |
|-------|-------------------|------------------------|--------------------------|-------|------|----------------|------|------|------|
| 1     | Rh-1              | -                      | Toluene                  | 95    | 24   | 100            | 40.4 | 39.9 | 19.7 |
| 2     | Rh-2              | -                      | Toluene                  | 95    | 24   | 100            | 38.4 | 42.1 | 19.5 |
| 3     | Rh-3              | -                      | Toluene                  | 95    | 24   | 100            | 38.4 | 42.7 | 18.9 |
| 4     | Rh-4              | -                      | Toluene                  | 95    | 24   | 90             | 17.6 | 53.2 | 29.2 |
| 5     | Rh-5              | -                      | $\text{CH}_2\text{Cl}_2$ | 80    | 24   | 100            | 36.5 | 33.8 | 29.7 |
| 6     | Rh-1              | -                      | $\text{CH}_2\text{Cl}_2$ | 80    | 24   | 100            | 38.9 | 49.3 | 11.8 |
| 7     | Rh-1              | -                      | THF                      | 80    | 24   | 100            | 38.9 | 46.6 | 14.5 |
| 8     | Rh-1              | -                      | neat                     | 95    | 24   | 100            | 35.6 | 45.7 | 18.7 |
| 9     | Rh-1 <sup>a</sup> | AgOTf                  | Toluene                  | 95    | 24   | 100            | 37   | 45.3 | 17.7 |
| 10    | Rh-1 <sup>a</sup> | $\text{KO}^t\text{Bu}$ | Toluene                  | 95    | 24   | 100            | 37.5 | 43.2 | 19.3 |
| 11    | Rh-1 <sup>b</sup> | nbe (1 eq)             | Toluene                  | 95    | 24   | 100            | 50.5 | 46.2 | 3.3  |
| 12    | Rh-1 <sup>c</sup> | nbe (2 eq)             | Toluene                  | 95    | 24   | 100            | 50.1 | 46.4 | 3.5  |
| 13    | Rh-1 <sup>d</sup> | nbe (3 eq)             | Toluene                  | 95    | 24   | 100            | 59.0 | 39.7 | 1.3  |
| 14    | Rh-1 <sup>e</sup> | nbe (5 eq)             | Toluene                  | 95    | 24   | 100            | 60.6 | 37.1 | 2.3  |
| 15    | Rh-1 <sup>f</sup> | -                      | Toluene                  | 95    | 24   | 100            | 55.0 | 16.8 | 28.2 |
| 16    | Rh-1 <sup>g</sup> | -                      | Toluene                  | 95    | 5    | 100            | 62.6 | 6.6  | 30.8 |
| 17    | -                 | -                      | Toluene                  | 95    | 24   | n.d            | -    | -    | -    |

Reaction conditions: Styrene (0.2 mmol, except when explicitly mentioned),  $\text{Et}_3\text{SiH}$  (0.2 mmol), catalyst (1 mol %), solvent (0.2 mL). The conversions and selectivity were determined by GC-MS and verified by  $^1\text{H}$  NMR. [a] 2 equiv. of additive was used. [b] 1 equiv. of additive was used. [c] 2 equiv. of additive was used. [d] 3 equiv. of styrene was used. [e] 2 equiv. of additive was used. [f] 2 equiv. of styrene was used (0.4 mmol). [g] 5 equiv. of styrene was used (1 mmol).

**Table S4. Optimization of Dehydrogenative silylation of styrene with Et<sub>3</sub>SiH by Ir-1**

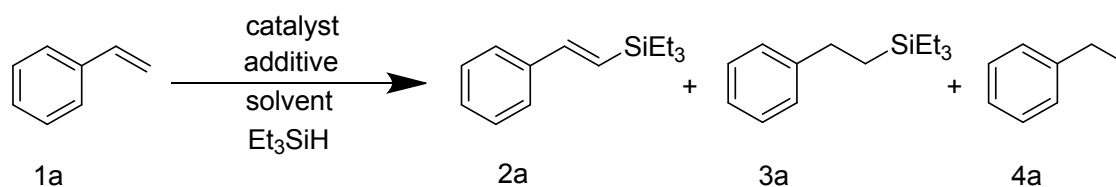

| Entry | Catalyst             | Additive           | Solvent | T(°C) | t(h) | Conversion (%) | 2a/3a | 2a | 3a | 4a |
|-------|----------------------|--------------------|---------|-------|------|----------------|-------|----|----|----|
| 1     | Ir-1                 | -                  | THF     | 80    | 24   | 76             | 34/65 | 29 | 54 | 17 |
| 2     | Ir-1                 | -                  | Toluene | 95    | 24   | 94             | 49/51 | 35 | 36 | 29 |
| 3     | Ir-1 <sup>b</sup>    | -                  | Toluene | 95    | 24   | 75             | 61/39 | 47 | 30 | 23 |
| 4     | Ir-1 <sup>c</sup>    | -                  | Toluene | 95    | 24   | 85             | 80/20 | 56 | 14 | 30 |
| 5     | Ir-1 <sup>c</sup>    | -                  | neat    | 95    | 24   | 91             | 65/35 | 52 | 28 | 20 |
| 6     | Ir-6 <sup>c</sup>    | -                  | Toluene | 95    | 24   | 98             | 66/34 | 51 | 26 | 23 |
| 7     | Ir-1 <sup>c, d</sup> | Nobornene          | Toluene | 95    | 24   | 100            | 68/32 | 60 | 28 | 12 |
| 8     | Ir-1 <sup>c, e</sup> | KO <sup>t</sup> Bu | Toluene | 95    | 24   | 88             | 62/38 | 53 | 33 | 14 |
| 9     | Ir-1 <sup>c, f</sup> | Nobornene          | Toluene | 95    | 24   | 64             | 66/34 | 63 | 33 | 5  |
| 10    | Ir-1 <sup>c, f</sup> | Cyclohexene        | Toluene | 95    | 24   | 64             | 66/34 | 63 | 33 | 5  |

Reaction conditions: Styrene (0.2 mmol), Et<sub>3</sub>SiH (0.2mmol), Ir-1 (1 mol%), solvent (0.2 mL). [a] The conversions and selectivity were determined by GC-MS and verified by <sup>1</sup>H NMR. [b] 2 equiv. of styrene was used. [c] 5 equiv. of styrene was used. [d] 1 equiv. of additive used. [e] 2 equiv. of additive used. [f] 3 equiv. of additive used.

**3.7** General procedure for the catalytic dehydrogenative silylation of vinylarenes  
A 4 mL screw capped high pressure bottle or vial equipped with a magnetic stir bar was charged with the catalyst (**Rh-1**, **Ir-1**, 1 mol%), vinylarenes (0.2 mmol or 1.0 mmol), and Et<sub>3</sub>SiH (0.2 mmol) under an argon atmosphere followed by toluene (0.2 mL). The resulted solution was stirred for 5 or 24 h at 95 °C. The catalytic conversions were monitored by GC-MS and NMR. The identity of the products was ascertained by NMR of the purified products.

### 3.8 Characterization of Silane Products

#### 3.8.1 *E*-Triethyl(styryl)silane (a)

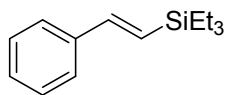

**<sup>1</sup>H NMR (500 MHz, CDCl<sub>3</sub>):** δ 7.49 (d, *J* = 7.5 Hz 2H), 7.34 – 7.17 (m, 3H), 6.91 (d, *J* = 19.3 Hz, 1H), 6.44 (d, *J* = 19.3 Hz, 1H), 1.00 (t, *J* = 8.0 Hz, 9H), 0.68 (q, *J* = 7.9 Hz, 6H) ppm. **<sup>13</sup>C{<sup>1</sup>H} NMR (125.76 MHz, CDCl<sub>3</sub>):** 144.97 (CH), 138.65 (CH), 128.63 (C<sub>arom</sub>), 128.01 (C<sub>arom</sub>), 126.45 (C<sub>arom</sub>), 126.04 (C<sub>arom</sub>), 7.55 (Si-CH<sub>3</sub>), 3.68 (Si-CH<sub>2</sub>) ppm. This compound has been previously characterized.<sup>4</sup>

#### 3.8.2 Triethyl(2-phenylethyl)silane (b)

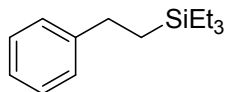

**<sup>1</sup>H NMR (500 MHz, CDCl<sub>3</sub>):** δ 7.49 (d, *J* = 1.6 Hz 2H), 7.34 – 7.17 (m, 3H), 2.66 – 2.57 (m, 2H), 0.94 (t, *J* = 7.9 Hz, 9H), 0.88 (t, *J* = 9.2 Hz, 2H), 0.57 (q, *J* = 7.9 Hz, 6H) ppm. **<sup>13</sup>C{<sup>1</sup>H} NMR (125.76 MHz, CDCl<sub>3</sub>):** 145.75 (C<sub>arom</sub>), 128.43 (C<sub>arom</sub>), 127.84 (C<sub>arom</sub>), 125.60 (C<sub>arom</sub>), 30.19 (CH<sub>2</sub>), 13.79 (CH<sub>2</sub>), 7.60 (Si-CH<sub>3</sub>), 3.42 (Si-CH<sub>2</sub>) ppm. This compound has been previously characterized.<sup>5</sup>



### 3.9 Catalysis of aromatic and aliphatic alkenes under optimized conditions

**Table S5. Rh-1 and Ir-1 catalyzed functionalization alkenes in toluene under optimized conditions**

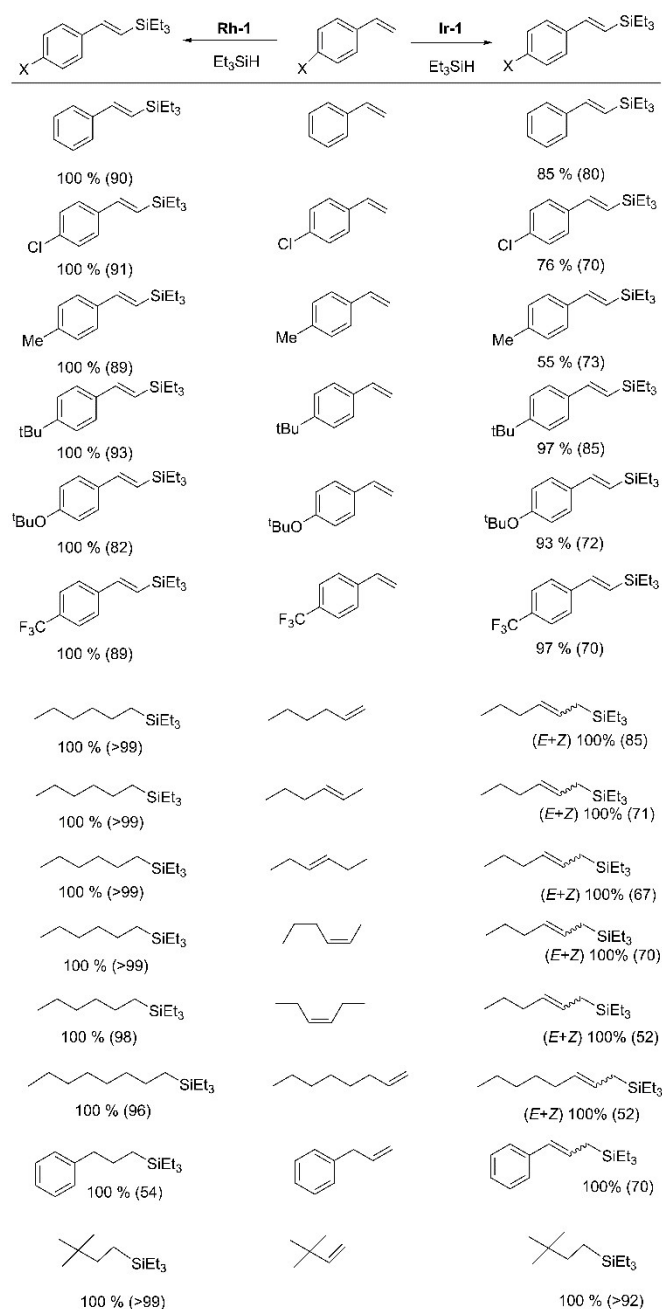

**Table S5.** Alkene functionalization with Et<sub>3</sub>SiH by **Ir-1** and **Rh-1**.

Reaction conditions for styrene substrates: styrene substrates (1.0 mmol), Et<sub>3</sub>SiH (0.2 mmol), **Rh-1** or **Ir-1** (1 mol%), toluene (0.2 mL), 95 °C for 5 h for **Rh-1**, 24 h for **Ir-1**. Reactions of aliphatic alkenes were carried out in neat conditions, alkene (0.2 mmol), Et<sub>3</sub>SiH (0.2 mmol), **Rh-1** or **Ir-1** (1 mol%), 40 °C for 24 h.<sup>d</sup> The conversion and selectivity were determined by GC-MS and <sup>1</sup>H NMR. The conversion, relative to Et<sub>3</sub>SiH, is

shown in the table in percentages. In brackets, the selectivity to the major product is shown. In Tables 3 and 4 in the main text, the overall yield of the major products are shown.

#### 4 A mechanistic proposal for styrene functionalization with Et<sub>3</sub>SiH

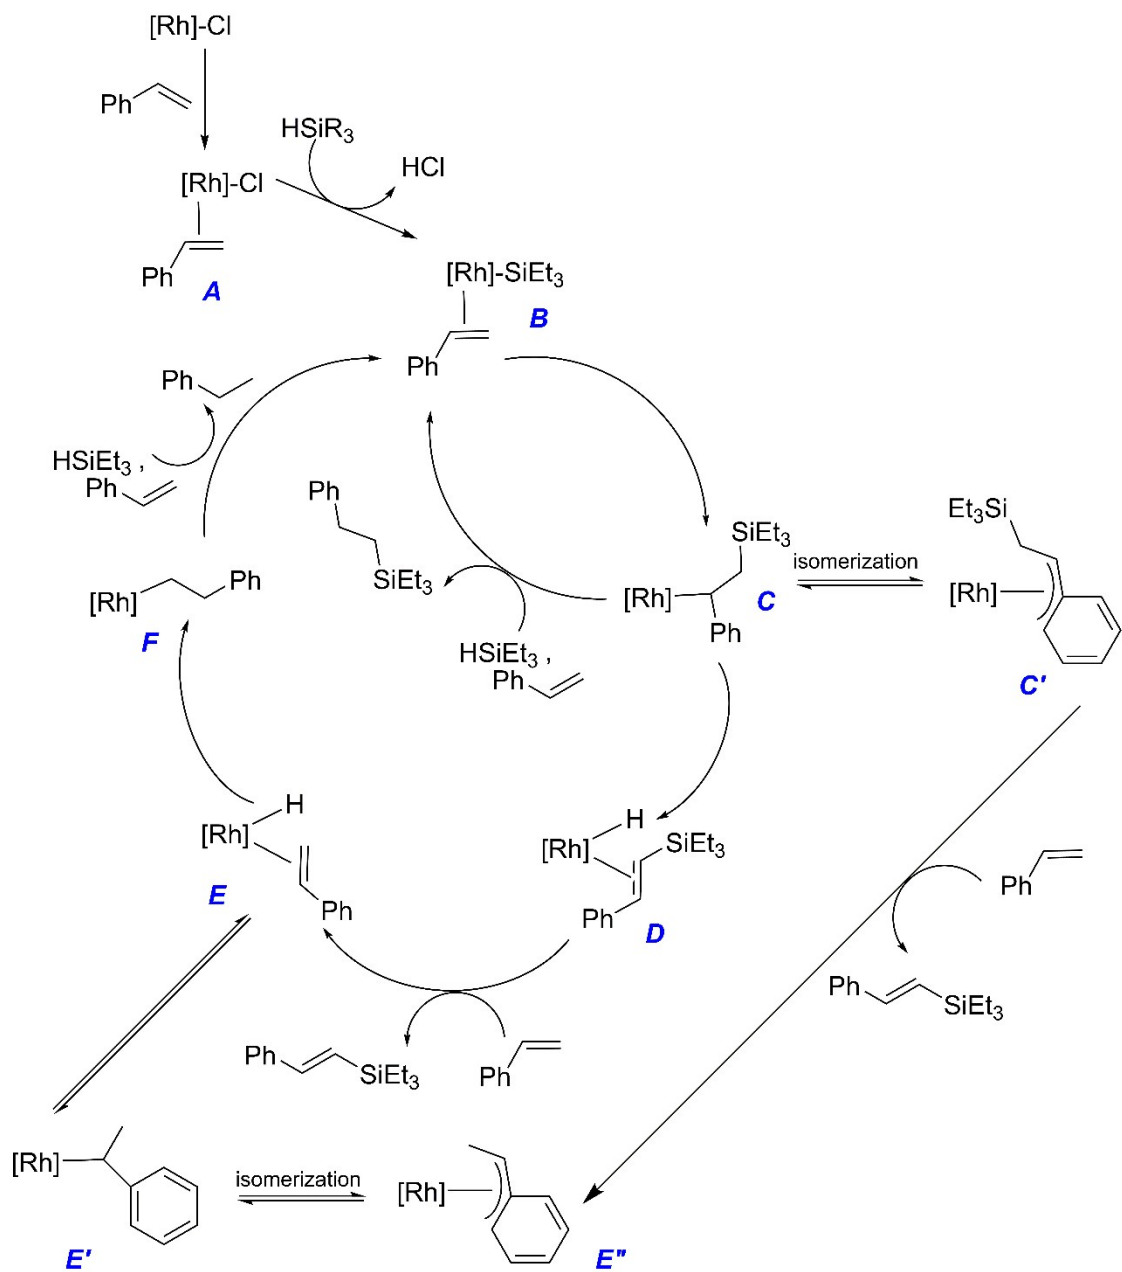

**Scheme S1.** The mechanistic proposal of Scheme 2 showing also possible resting states as π-allyl intermediates.

## 5 Catalytic studies on the reaction of Et<sub>3</sub>SiH and aliphatic alkenes

### 5.1 General procedure for the hydrogenative silylation of hexene isomers

A 4 mL screw capped vial equipped with a magnetic stir bar was charged with the catalyst (**Rh-1**, **Ir-1**, 1 mol%), hexene (1-hexene, *cis*-2-, *cis*-3-, *trans*-2-, *trans*-3-, 0.2 mmol), and Et<sub>3</sub>SiH (0.2 mmol) under an argon atmosphere without any solvent. The resulted solution was stirred for 24 h at 40 °C. The catalytic conversions were monitored by NMR and GC-MS.

### 5.2 Catalyzed functionalization of alkenes in toluene

**Table S6.** Dehydrogenative silylation of aliphatic alkenes with Et<sub>3</sub>SiH by using complex **Ir-1**

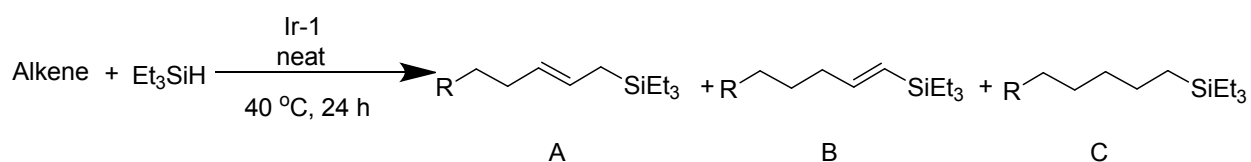

| Entry | cat.        | substrate              | Solvent | T(°C) | t(h) | Conv. (%) <sup>a</sup> | A  | B  | C  |
|-------|-------------|------------------------|---------|-------|------|------------------------|----|----|----|
| 1     | <b>Ir-1</b> | 1-Hexene               | neat    | 40    | 24   | 100                    | 85 | 15 | -  |
| 2     | <b>Ir-1</b> | <i>trans</i> -2-Hexene | neat    | 40    | 24   | 100                    | 71 | 15 | 14 |
| 3     | <b>Ir-1</b> | <i>trans</i> -3-Hexene | neat    | 40    | 24   | 100                    | 67 | 16 | 17 |
| 4     | <b>Ir-1</b> | <i>cis</i> -2-Hexene   | neat    | 40    | 24   | 100                    | 70 | 16 | 14 |
| 5     | <b>Ir-1</b> | <i>cis</i> -3-Hexene   | neat    | 40    | 24   | 100                    | 52 | 11 | 37 |
| 6     | <b>Ir-1</b> | 1-Octene               | neat    | 40    | 24   | 100                    | 52 | 8  | 40 |
| 7     | <b>Ir-1</b> | Allyl benzene          | neat    | 40    | 24   | 100*                   | 70 | -  | -  |

\* Conversion to other unidentified products

<sup>1</sup>H NMR spectra of the purified catalytic reactions were obtained showing conversion to the same product from the different hexene isomers.

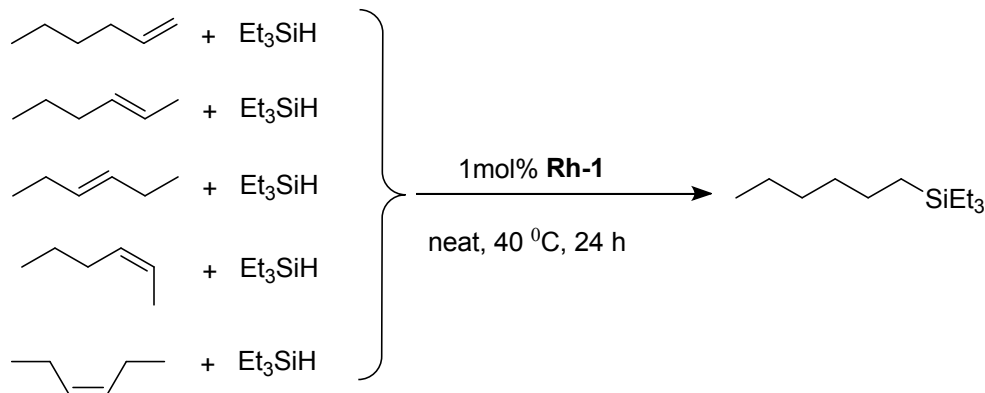

For example, from the hydrosilylation of 1-hexene in the presence of  $\text{Et}_3\text{SiH}$  using **Rh-1** as the catalyst, triethylhexylsilane (c) was obtained

### 5.2.1 Triethyl(hexyl)silane (c)

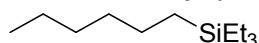

$^1\text{H NMR}$  (500 MHz,  $\text{CDCl}_3$ ):  $\delta$  1.29 (m, 8H), 0.93 (t,  $J = 7.9$  Hz, 9H), 0.89 (t,  $J = 7.1$  Hz, 3H), 0.50 (q,  $J = 8.0$  Hz, 8H) ppm.  $^{13}\text{C}\{^1\text{H}\}$  NMR (125.76 MHz,  $\text{CDCl}_3$ ): 33.80 ( $\text{CH}_2$ ), 31.77 ( $\text{CH}_2$ ), 23.99 ( $\text{CH}_2$ ), 22.82 ( $\text{CH}_2$ ), 14.31 ( $\text{CH}_3$ ), 11.51 ( $\text{CH}_2$ ), 7.63 ( $\text{CH}_3\text{-SiEt}_3$ ), 3.52 ( $\text{CH}_2\text{-SiEt}_3$ ) ppm. This compound has been previously characterized.<sup>5</sup>

### 5.3 Ir-1 catalysis of hexene isomers

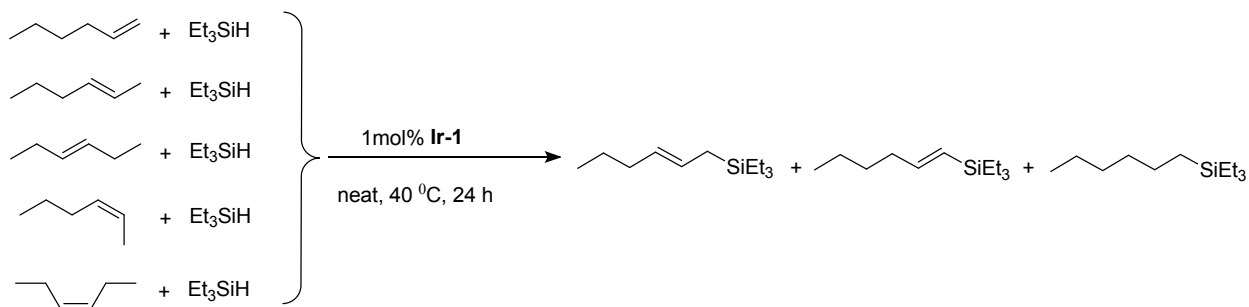

Silane product obtained from the hydrosilylation of 1-hexene in the presence of Et<sub>3</sub>SiH with **Ir-1** as the catalyst

### 5.3.1 Triethyl(hex-2-en-1-yl)silane (d)

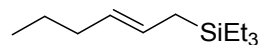

**<sup>1</sup>H NMR (500 MHz, CDCl<sub>3</sub>):** 5.38 (dt, *J* = 15.0 Hz, *J* = 7.2 Hz, 1H), 5.26 (dt, *J* = 15.0 Hz, *J* = 6.8 Hz, 1H), 1.99-1.93 (m, 2H), 1.45 (d, *J* = 7.8 Hz, 2H) 1.38-1.33 (m, 2H), 0.93 (t, *J* = 7.9 Hz, 9H), 0.88 (t, *J* = 7.3 Hz, 3H), 0.52 (q, *J* = 7.9 Hz, 6H) ppm. **<sup>13</sup>C{<sup>1</sup>H} NMR (125.76 MHz, CDCl<sub>3</sub>):** 128.6 (CH), 126.2 (CH) 34.9 (CH<sub>2</sub>), 23.1 (CH<sub>2</sub>), 17.3 (CH<sub>2</sub>), 13.6 (CH<sub>3</sub>), 7.3 (CH<sub>3</sub>-SiEt<sub>3</sub>), 3.1 (CH<sub>2</sub>-SiEt<sub>3</sub>) ppm. This compound has been previously characterized.<sup>5</sup>

### 5.3.2 General procedure for the hydrogenative silylation of other aliphatic alkenes

A 4 mL screw capped vial equipped with a magnetic stir bar was charged with the catalyst (**Rh-1**, **Ir-1**, 1 mol%), alkene (0.2 mmol), and Et<sub>3</sub>SiH (0.2 mmol) under an argon atmosphere without any solvent. The resulted solution was stirred for 24 h at 40 °C. The catalytic conversions were monitored by GC-MS. <sup>1</sup>H NMR spectra of the purified product was obtained.

### 5.3.3 Triethyl(octyl)silane (e)

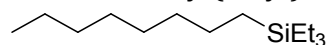

<sup>1</sup>H NMR (500 MHz, CDCl<sub>3</sub>): δ 1.28 (m, 12H), 0.92 (t, *J* 7.9 Hz, 9H), 0.88 (t, *J* 7.0 Hz, 3H), 0.50 (q, *J* 8.0 Hz, 8H) ppm. <sup>13</sup>C{<sup>1</sup>H} NMR (125.76 MHz, CDCl<sub>3</sub>): 34.15 (CH<sub>2</sub>), 32.14 (CH<sub>2</sub>), 29.48 (CH<sub>2</sub>), 24.03 (CH<sub>2</sub>), 22.87 (CH<sub>2</sub>), 14.28 (CH<sub>3</sub>), 11.50 (CH<sub>2</sub>), 7.63 (CH<sub>3</sub>-SiEt<sub>3</sub>), 3.52 (CH<sub>2</sub>-SiEt<sub>3</sub>) ppm. This compound has been previously characterized.<sup>5</sup>

### 5.3.4 Triethyl(oct-2-en-1-yl)silane (f)

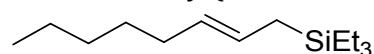

<sup>1</sup>H NMR (500 MHz, CDCl<sub>3</sub>): 5.37 (dt, *J* = 15.0 Hz, *J* = 7.0 Hz, 1H), 5.25 (dt, *J* = 15.0 Hz, *J* = 7.0 Hz, 1H), 1.99-1.93 (m, 2H), 1.44 (d, *J* = 7.9 Hz, 2H) 1.33-1.27 (m, 6H), 0.93 (t, *J* = 8.0 Hz, 9H), 0.88 (t, *J* = 6.8 Hz, 3H), 0.50 (q, *J* = 8.0 Hz, 6H) ppm. <sup>13</sup>C{<sup>1</sup>H} NMR (125.76 MHz, CDCl<sub>3</sub>): 128.8 (CH), 126.0 (CH), 32.7 (CH<sub>2</sub>), 31.3 (CH<sub>2</sub>), 29.6 (CH<sub>2</sub>), 22.5 (CH<sub>2</sub>), 17.3 (CH<sub>2</sub>), 14.1 (CH<sub>3</sub>), 7.3 (CH<sub>3</sub>-SiEt<sub>3</sub>), 3.1 (CH<sub>2</sub>-SiEt<sub>3</sub>) ppm. This compound has been previously characterized.<sup>5</sup>

### 5.3.5 Triethyl(3,3-dimethylbutyl)silane (g)

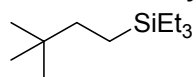

**<sup>1</sup>H NMR (500 MHz, CDCl<sub>3</sub>):** δ 1.14 (m, 2H), 0.93 (t, *J* = 7.9 Hz, 9H), 0.85 (s, 9H), 0.50 (q, *J* = 8.0 Hz, 6H), 0.44 (m, 2H) ppm. **<sup>13</sup>C{<sup>1</sup>H} NMR (125.76 MHz, CDCl<sub>3</sub>):** 37.93 (CH<sub>2</sub>), 31.27 (C), 28.95 (CH<sub>3</sub>), 7.62 (CH<sub>3</sub>-SiEt<sub>3</sub>), 5.21 (CH<sub>2</sub>), 3.36 (CH<sub>2</sub>-SiEt<sub>3</sub>) ppm. This compound has been previously characterized.<sup>5</sup>

### 5.3.6 Cinnamyltriethylsilane (h)

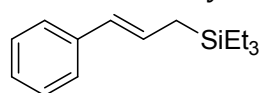

**<sup>1</sup>H NMR (500 MHz, CDCl<sub>3</sub>):** δ 7.36 – 7.27 (m, 4H), 7.23 – 7.15 (m, 1H), 6.34 – 6.22 (m, 2H), 1.74 (dd, *J* = 4.8, 2.1 Hz, 2H), 0.94 (t, *J* = 7.9 Hz, 9H), 0.53 (q, *J* = 7.9 Hz, 6H) ppm. **<sup>13</sup>C{<sup>1</sup>H} NMR (125.76 MHz, CDCl<sub>3</sub>):** 138.69 (C<sub>arom</sub>), 128.58 (C<sub>arom</sub>), 128.35 (C<sub>arom</sub>), 128.18 (C<sub>arom</sub>), 126.28 (CH), 125.60 (CH), 18.99 (CH<sub>2</sub>), 7.60 (CH<sub>3</sub>), 3.45 (CH<sub>2</sub>) ppm. This compound has been previously characterized.<sup>6</sup>

### 5.3.7 Triethyl(3-phenylpropyl)silane (i)

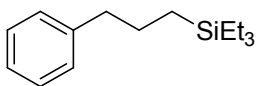

**<sup>1</sup>H NMR (500 MHz, CDCl<sub>3</sub>):** δ 7.36 – 7.27 (m, 2H), 7.23 – 7.15 (m, 3H), 2.65 (t, *J* = 7.7 Hz, 2H), 1.68 – 1.61 (m, 2H), 1.00 (t, *J* = 7.9 Hz, 9H), 0.61 (q, *J* = 8.0 Hz, 8H) ppm. **<sup>13</sup>C{<sup>1</sup>H} NMR (125.76 MHz, CDCl<sub>3</sub>):** 142.90 (C<sub>arom</sub>), 128.59 (C<sub>arom</sub>), 128.21 (C<sub>arom</sub>), 125.73 (C<sub>arom</sub>), 40.40 (CH<sub>2</sub>), 26.23 (CH<sub>2</sub>), 11.49 (CH<sub>2</sub>), 7.52 (CH<sub>3</sub>), 3.40 (CH<sub>2</sub>) ppm. This compound has been previously characterized.<sup>7</sup>

## 6 Catalytic studies on the reactions of other silanes with styrene and 1-hexene

A 4 mL screw capped vial equipped with a magnetic stir bar was charged with the catalyst (**Rh-1**, **Ir-1**, 1 mol%), styrene (0.2 mmol) or 1-hexene (0.2 mmol) and silanes (0.2 mmol) under an argon atmosphere followed by toluene (0.2 mL). The resulted solution was stirred for 24 h at 95 °C. The catalytic conversions were monitored by GC-MS and <sup>1</sup>H NMR of the purified compounds was obtained.

**Table S7.** Hydrosilylation of styrene and 1-hexene with different silanes by using **Rh-1** complex

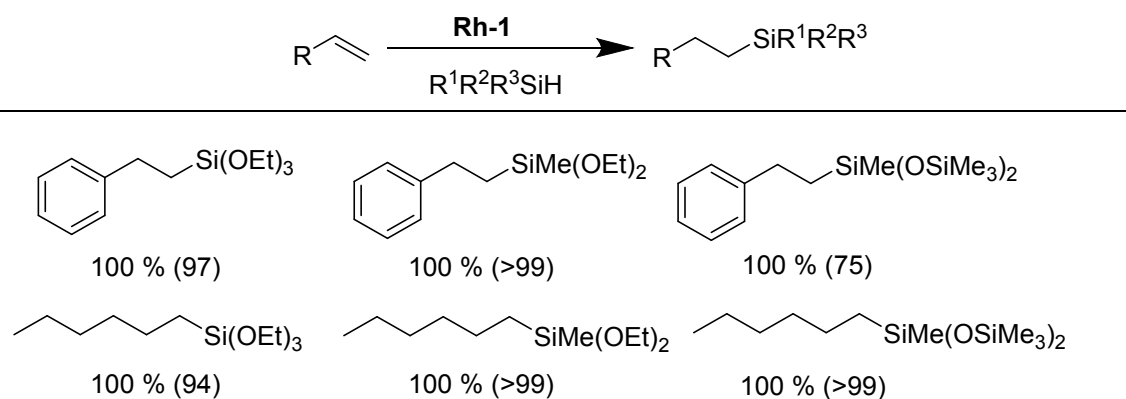



**Table S8.** Hydrosilylation of styrene and 1-hexene with different silanes by using **Rh-1** complex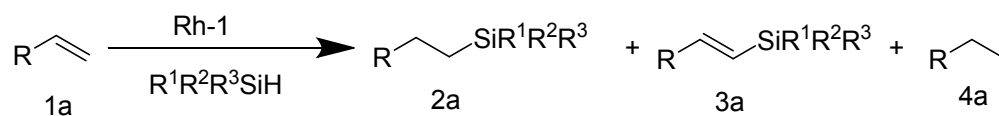

| Entry | Substrate | Silane                    | Solvent | T(°C) | t(h) | Conversion (%) <sup>a</sup> | 2a/3a | 2a  | 3a  | 4a                   |
|-------|-----------|---------------------------|---------|-------|------|-----------------------------|-------|-----|-----|----------------------|
| 1     | Styrene   | (OEt) <sub>3</sub> SiH    | Toluene | 95    | 24   | 100                         | 97/3  | 93  | 3   | 4                    |
| 2     | 1-hexene  | (OEt) <sub>3</sub> SiH    | Toluene | 95    | 24   | 100                         |       | 94  | -   | Other hexene isomers |
| 3     | Styrene   | (OEt) <sub>2</sub> MeSiH  | Toluene | 95    | 24   | 100                         | 99/1  | 97  | 0.9 | 2.1                  |
| 4     | 1-hexene  | (OEt) <sub>2</sub> MeSiH  | Toluene | 95    | 24   | 100                         |       | >99 | -   | -                    |
| 5     | Styrene   | SiMe(OTMS) <sub>2</sub> H | Toluene | 95    | 24   | 100                         | 75/25 | 70  | 23  | 7                    |
| 6     | 1-hexene  | SiMe(OTMS) <sub>2</sub> H | Toluene | 95    | 24   | 100                         |       | >99 | -   | -                    |

Reaction conditions: Substrate (0.2mmol), silane (0.2 mmol), **Rh-1** (1 mol %), toluene (0.2 mL), 95 °C, 24 h. <sup>a</sup>The conversion and selectivity were determined by GC-MS and <sup>1</sup>H NMR.

## 6.1 Characterization of silane products

### 6.1.1 Triethoxy(2-phenylethyl)silane (j)

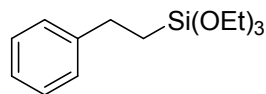

<sup>1</sup>H NMR (500 MHz, CDCl<sub>3</sub>): δ 7.29 (t, *J* 7.4 Hz, 2H), 7.25 – 7.16 (m, 3H), 3.85 (q, *J* = 7.0 Hz, 6H), 2.82 – 2.69 (m, 2H), 1.26 (t, *J* = 7.0 Hz, 9H), 1.05 – 0.96 (m, 2H) ppm. <sup>13</sup>C{<sup>1</sup>H} NMR (125.76 MHz, CDCl<sub>3</sub>): 144.73 (C<sub>arom</sub>), 128.41 (2C<sub>arom</sub>), 127.90 (2C<sub>arom</sub>), 125.73 (C<sub>arom</sub>), 58.51 (CH<sub>2</sub>-Si(OEt)<sub>2</sub>), 29.00 (CH<sub>2</sub>), 18.43 (CH<sub>3</sub>-Si(OEt)<sub>3</sub>), 12.63 (CH<sub>2</sub>) ppm. This compound has been previously characterized.<sup>8</sup>

### 6.1.2 Triethoxy(hexyl)silane (k)

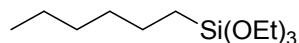

<sup>1</sup>H NMR (500 MHz, CDCl<sub>3</sub>): δ 3.81 (q, *J* = 7.9 Hz, 6H), 1.39 (m, 2H), 1.29 (m, 6H), 1.22 (t, *J* = 7.0 Hz, 9H), 0.89 (t, *J* = 6.7 Hz, 3H), 0.62 (m, 2H) ppm. <sup>13</sup>C{<sup>1</sup>H} NMR (125.76 MHz, CDCl<sub>3</sub>): 58.42 (CH<sub>2</sub>-

Si(OEt)<sub>3</sub>, 33.02 (CH<sub>2</sub>), 31.64 (CH<sub>2</sub>), 22.87 (CH<sub>2</sub>), 22.71 (CH<sub>2</sub>), 18.43 (CH<sub>3</sub>-Si(OEt)<sub>3</sub>), 14.24 (CH<sub>3</sub>), 10.54 (CH<sub>2</sub>) ppm. This compound has been previously characterized.<sup>9</sup>

### 6.1.3 Diethoxy(methyl)(2-phenylethyl)silane (l)

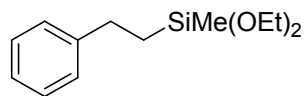

**<sup>1</sup>H NMR (500 MHz, CDCl<sub>3</sub>):** δ 7.33 – 7.29 (m, 2H), 7.27 – 7.23 (m, 2H), 7.22 – 7.18 (m, 1H), 3.82 (q, *J* = 7.0 Hz, 4H), 2.78 – 2.72 (m, 2H), 1.27 (t, *J* = 7.0 Hz, 6H), 1.07 – 1.02 (m, 2H), 0.16 (s, 3H) ppm. **<sup>13</sup>C{<sup>1</sup>H} NMR (125.76 MHz, CDCl<sub>3</sub>):** 144.76 (C<sub>arom</sub>), 128.41 (2C<sub>arom</sub>), 127.91 (2C<sub>arom</sub>), 125.71 (C<sub>arom</sub>), 58.26 (Si(OCH<sub>2</sub>CH<sub>3</sub>)<sub>2</sub>), 29.07 (CH<sub>2</sub>), 18.54 (Si(OCH<sub>2</sub>CH<sub>3</sub>)<sub>2</sub>), 15.95 (CH<sub>2</sub>), -4.68 (CH<sub>3</sub>) ppm.

### 6.1.4 Diethoxy(hexyl)(methyl)silane (m)

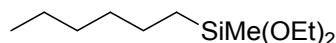

**<sup>1</sup>H NMR (500 MHz, CDCl<sub>3</sub>):** δ 3.76 (q, *J* = 7.0 Hz, 4H), 1.34 – 1.26 (m, 8H), 1.23 – 1.20 (m, 6H), 0.89 – 0.87 (m, 3H), 0.66 – 0.59 (m, 2H), 0.11 (s, 3H) ppm. **<sup>13</sup>C{<sup>1</sup>H} NMR (125.76 MHz, CDCl<sub>3</sub>):** 58.19 (CH<sub>2</sub>-Si(OEt)<sub>2</sub>), 33.14 (CH<sub>2</sub>), 31.70 (CH<sub>2</sub>), 22.73 (CH<sub>2</sub>), 18.57 (CH<sub>3</sub>-Si(OEt)<sub>2</sub>), 14.28 (CH<sub>3</sub>), 13.98 (CH<sub>2</sub>), 2.01 (CH<sub>2</sub>), -4.72 (CH<sub>3</sub>) ppm.

### 6.1.5 1,1,1,3,5,5,5-heptamethyl-3-phenylethyltrisiloxane (n)

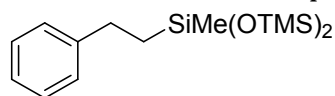

**<sup>1</sup>H NMR (500 MHz, CDCl<sub>3</sub>):** δ 7.33 (t, *J* = 7.6 Hz, 2H), 7.27 – 7.19 (m, 3H), 2.73 – 2.66 (m, 2H), 0.92 – 0.86 (m, 2H), 0.17 (s, 18H), 0.09 (s, 3H) ppm. **<sup>13</sup>C{<sup>1</sup>H} NMR (125.76 MHz, CDCl<sub>3</sub>):** 145.30 (C<sub>arom</sub>), 128.44 (2C<sub>arom</sub>), 127.94 (2C<sub>arom</sub>), 125.63 (C<sub>arom</sub>), 29.43 (CH<sub>2</sub>), 19.90 (CH<sub>2</sub>), 2.04 (CH<sub>3</sub>-(OSi(Me)<sub>3</sub>)<sub>2</sub>), 0.16 (CH<sub>3</sub>) ppm. This compound has been previously characterized.<sup>10</sup>

### 6.1.6 3-hexyl-1,1,1,3,5,5,5-heptamethyltrisiloxane (o)

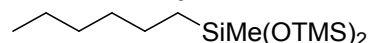

**<sup>1</sup>H NMR (500 MHz, CDCl<sub>3</sub>):** δ 1.30 (tdd, *J* = 9.6, 5.6, 3.2 Hz, 8H), 0.91 – 0.87 (m, 3H), 0.48 – 0.42 (m, 2H), 0.09 (s, 18H), 0.00 (s, 3H) ppm. **<sup>13</sup>C{<sup>1</sup>H} NMR (125.76 MHz, CDCl<sub>3</sub>):** 31.81 (CH<sub>2</sub>), 31.73

(CH<sub>2</sub>), 23.22 (CH<sub>2</sub>), 22.79 (CH<sub>2</sub>), 17.81 (CH<sub>2</sub>), 14.30 (CH<sub>3</sub>), 2.02 (CH<sub>3</sub>-(OSi(Me)<sub>3</sub>)<sub>2</sub>), -0.10 (CH<sub>3</sub>) ppm.

This compound has been previously characterized.<sup>11</sup>

**7 Mechanistic proposal for hydrosilylation/dehydrogenative silylation by Rh-1 with HSi(OEt)<sub>3</sub>**

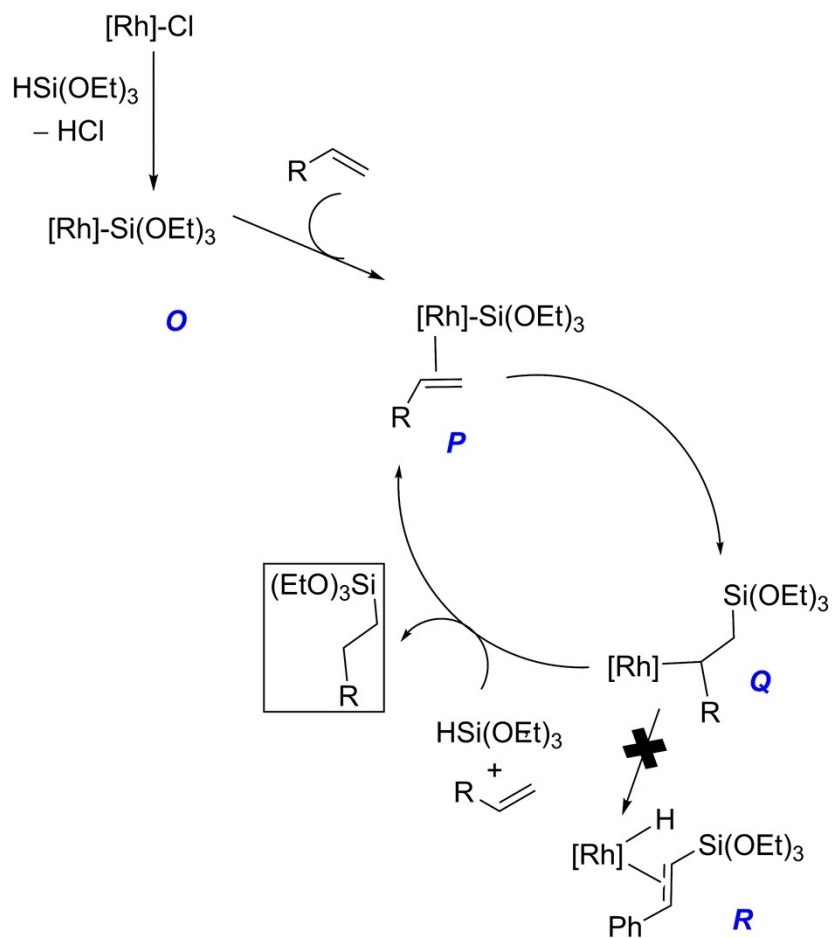

**Scheme S2.** The proposed mechanism for the catalysis of **Rh-1** with HSi(OEt)<sub>3</sub> shown in Table 6.

## 8 Hydrosilylation/dehydrogenative silylation of other substrates

### 8.1 General procedure for the catalytic reaction of 2,3-dimethyl-1,4-butadiene and Et<sub>3</sub>SiH

A 4 mL screw capped vial equipped with a magnetic stir bar was charged with the catalyst (**Rh-1**, **Ir-1**, 1 mol%), 2,3-dimethyl-1,4-butadiene (0.2 mmol) and Et<sub>3</sub>SiH (0.2 mmol) under an argon atmosphere and performed the reaction under neat conditions. The resulted solution was stirred for 24 h at 60 °C. The catalytic conversions were monitored by GC-MS and <sup>1</sup>H NMR of the purified compounds was obtained.

#### 8.1.1 (2,3-dimethylbut-2-en-1-yl)triethylsilane (p)

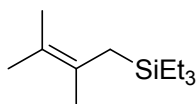

<sup>1</sup>H NMR (500 MHz, CDCl<sub>3</sub>): 1.63 (s, 6H), 1.61 (s, 3H), 1.53 (s, 2H), 0.94 (t, *J* = 7.9 Hz, 9H), 0.53 (q, *J* = 7.9 Hz, 9H), ppm. <sup>13</sup>C{<sup>1</sup>H} NMR (125.76 MHz, CDCl<sub>3</sub>): 125.1 (C<sub>2</sub> alkene), 120.3 (C<sub>3</sub> alkene), 21.0 (CH<sub>3</sub>), 20.9 (CH<sub>3</sub>), 20.3 (CH<sub>2</sub>), 7.3 (CH<sub>3</sub>-SiEt<sub>3</sub>), 4.1 (CH<sub>2</sub>-SiEt<sub>3</sub>) ppm. This compound has been previously characterized.<sup>12</sup>

#### 8.1.2 (2,3-dimethylbut-3-en-1-yl)triethylsilane (q)

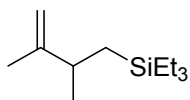

<sup>1</sup>H NMR (300 MHz, CDCl<sub>3</sub>): 4.74-4.73 (m, 1H), 4.63-4.62 (m, 1H), 2.41-2.34 (m, 1H), 1.72 (s, 3H), 1.07 (d, *J* = 6.8 Hz, 3H), 0.97 (t, *J* = 8.0 Hz, 9H), 0.65-0.53 (m, 8H) ppm. <sup>13</sup>C{<sup>1</sup>H} NMR (75 MHz, CDCl<sub>3</sub>): 152.8 (C<sub>alkene</sub>), 107.9 (CH<sub>2</sub> alkene), 37.2 (CH), 23.0 (CH<sub>3</sub>), 18.6 (CH<sub>3</sub>), 18.2 (CH<sub>2</sub>), 7.4 (CH<sub>3</sub>-SiEt<sub>3</sub>), 3.8 (CH<sub>2</sub>-SiEt<sub>3</sub>) ppm. This compound has been previously characterized.<sup>12</sup>

## 9 NMR spectra

### 9.1 NMR spectra of a typical catalysis of styrene and Et<sub>3</sub>SiH

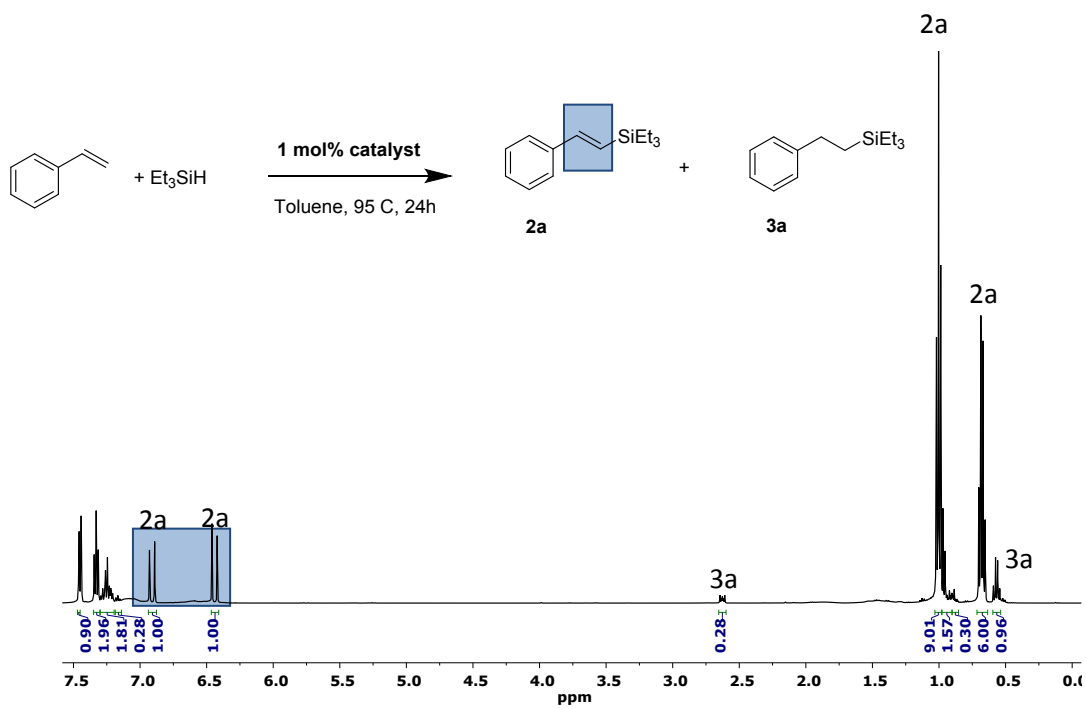

**Figure S19.** <sup>1</sup>H NMR spectrum (500 MHz, CDCl<sub>3</sub>, 293 K) obtained for a catalysis with **Rh-1**.

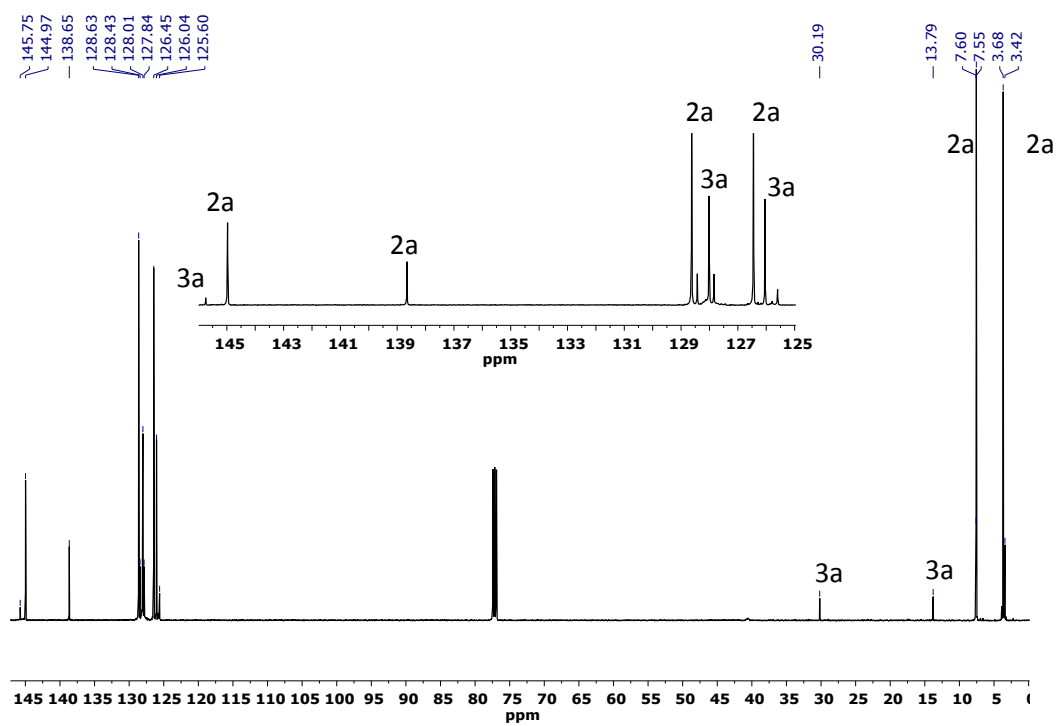

Figure S20.  $^{13}\text{C}\{^1\text{H}\}$  NMR spectrum (125.76 MHz,  $\text{CDCl}_3$ , 293 K) obtained for a catalysis with **Rh-1**.

## 9.2 NMR spectra of a typical hydrosilylation catalysis of 1-hexene with Et<sub>3</sub>SiH

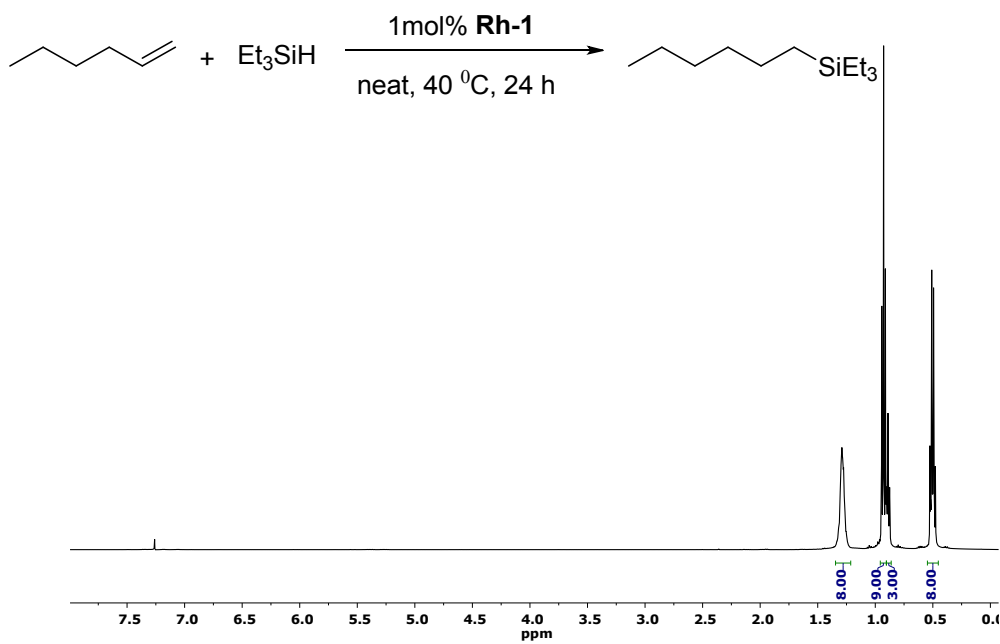

Figure S21. <sup>1</sup>H NMR spectrum (500 MHz, CDCl<sub>3</sub>, 293 K) of a 1-hexene catalysis of Rh-1.

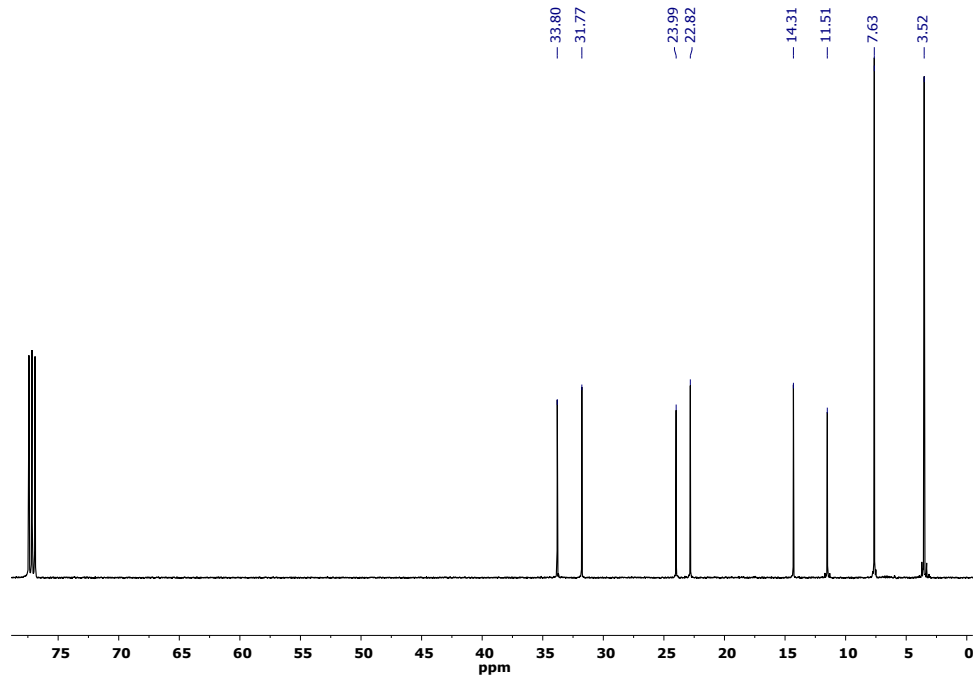

Figure S22. <sup>13</sup>C{<sup>1</sup>H} NMR spectrum (125.76 MHz, CDCl<sub>3</sub>, 293 K).



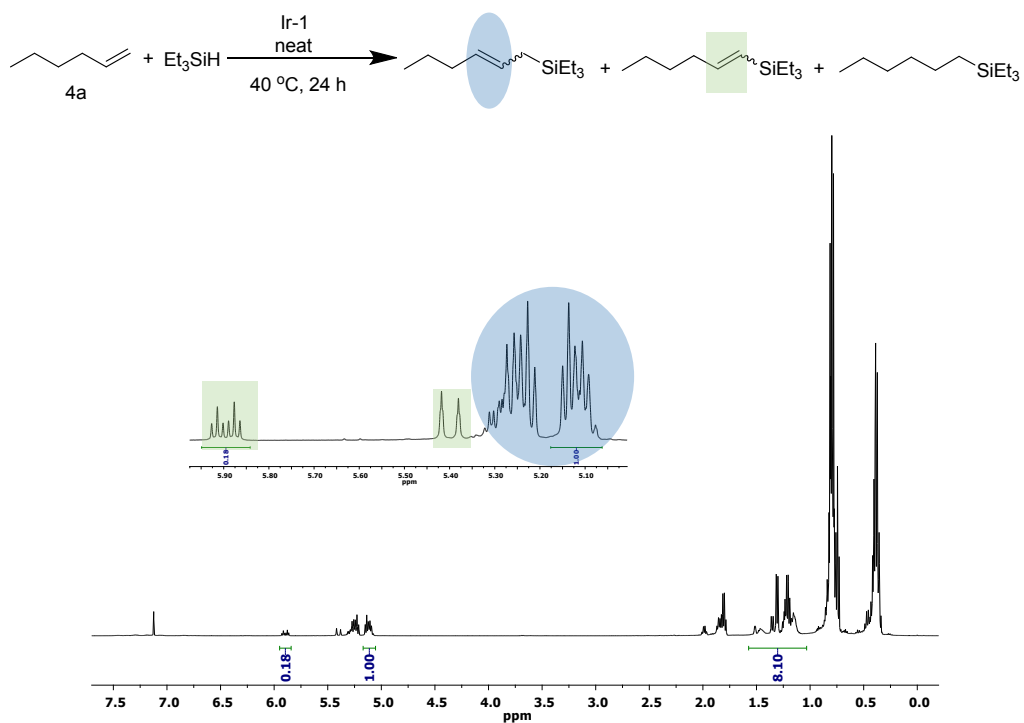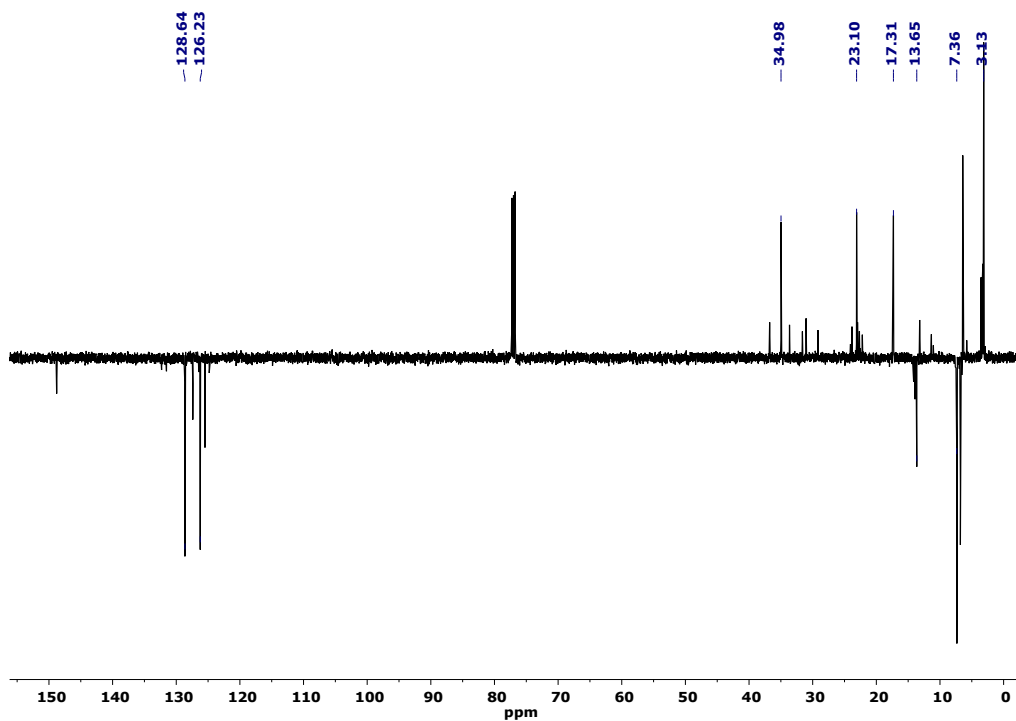

### 9.3 NMR spectra of a typical hydrosilylation catalysis of t-2-hexene with Et<sub>3</sub>SiH

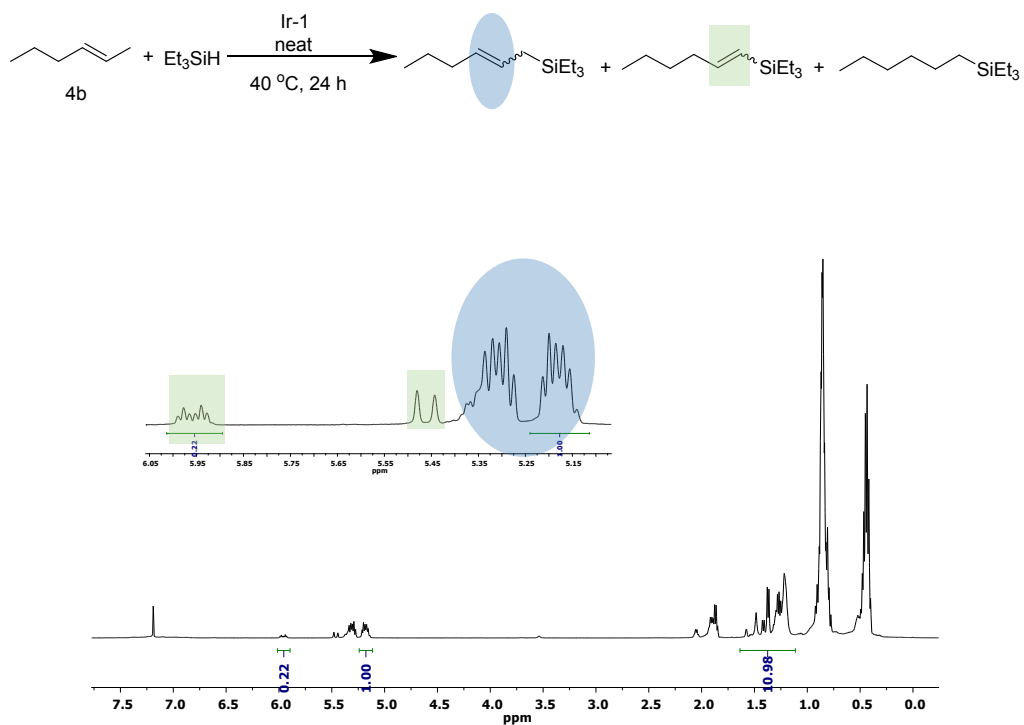

Figure S25. <sup>1</sup>H NMR spectrum (500 MHz, CDCl<sub>3</sub>, 293 K).

## 9.4 NMR spectra of a typical hydrosilylation catalysis of t-3-hexene with Et<sub>3</sub>SiH

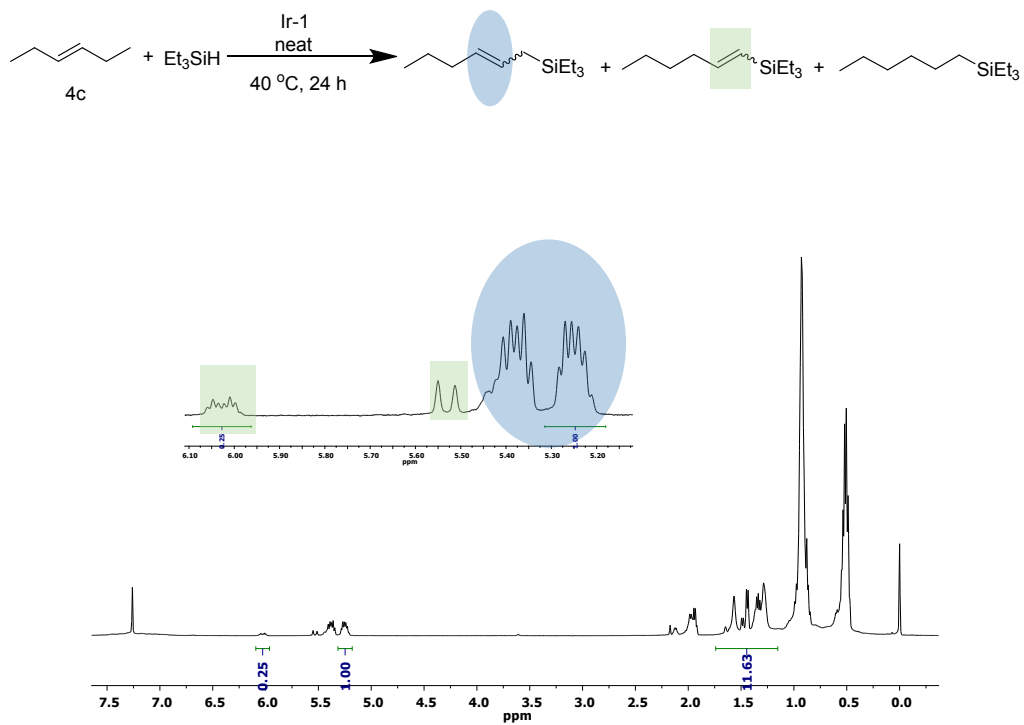

**Figure S26.** <sup>1</sup>H NMR spectrum (500 MHz, CDCl<sub>3</sub>, 293 K).

## 9.5 NMR spectra of a typical hydrosilylation catalysis of c-2-hexene with Et<sub>3</sub>SiH

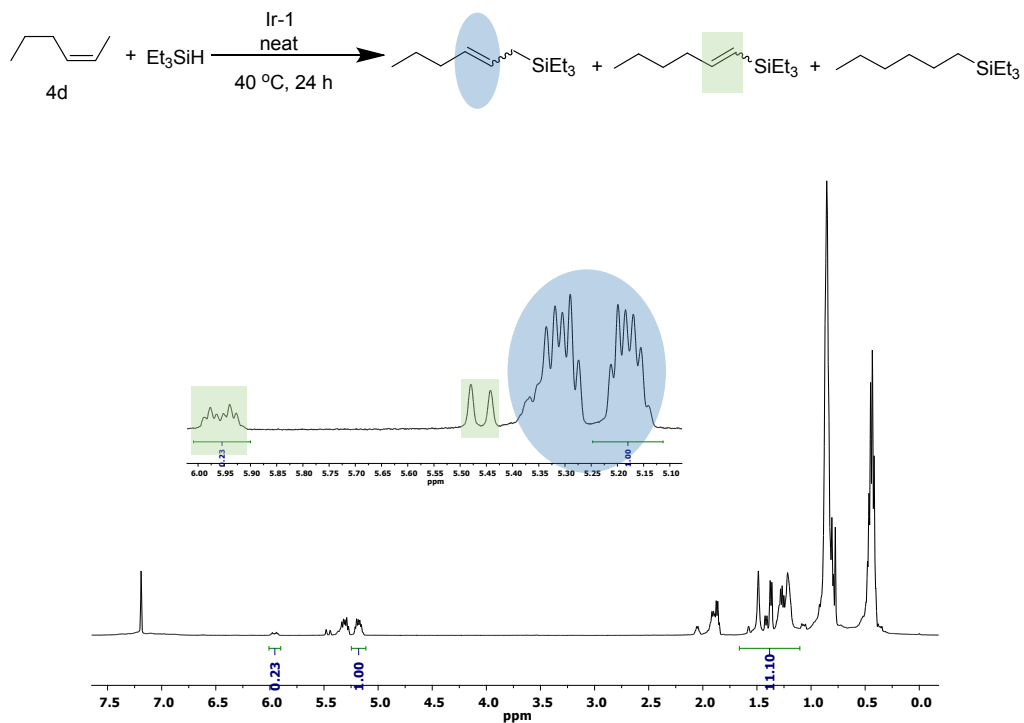

**Figure S27.** <sup>1</sup>H NMR spectrum (500 MHz, CDCl<sub>3</sub>, 293 K).

## 9.6 NMR spectra of a typical hydrosilylation catalysis of c-3-hexene with Et<sub>3</sub>SiH

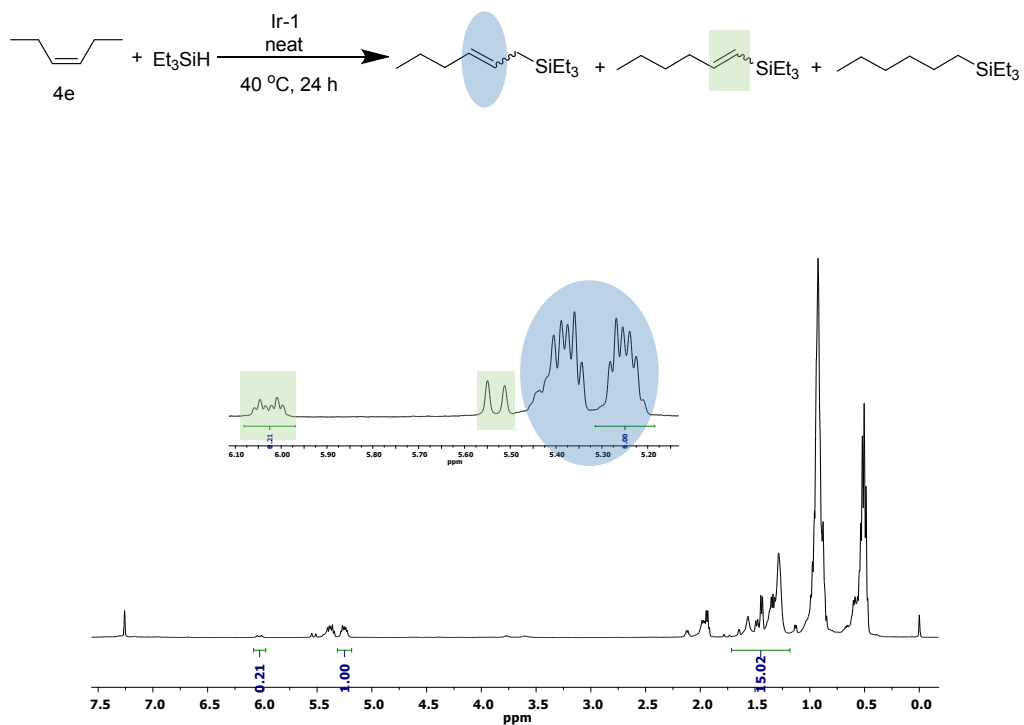

**Figure S28.** <sup>1</sup>H NMR spectrum (500 MHz, CDCl<sub>3</sub>, 293 K).

## 9.7 NMR spectra of the catalytic hydrosilylation of 1-octene with $\text{Et}_3\text{SiH}$

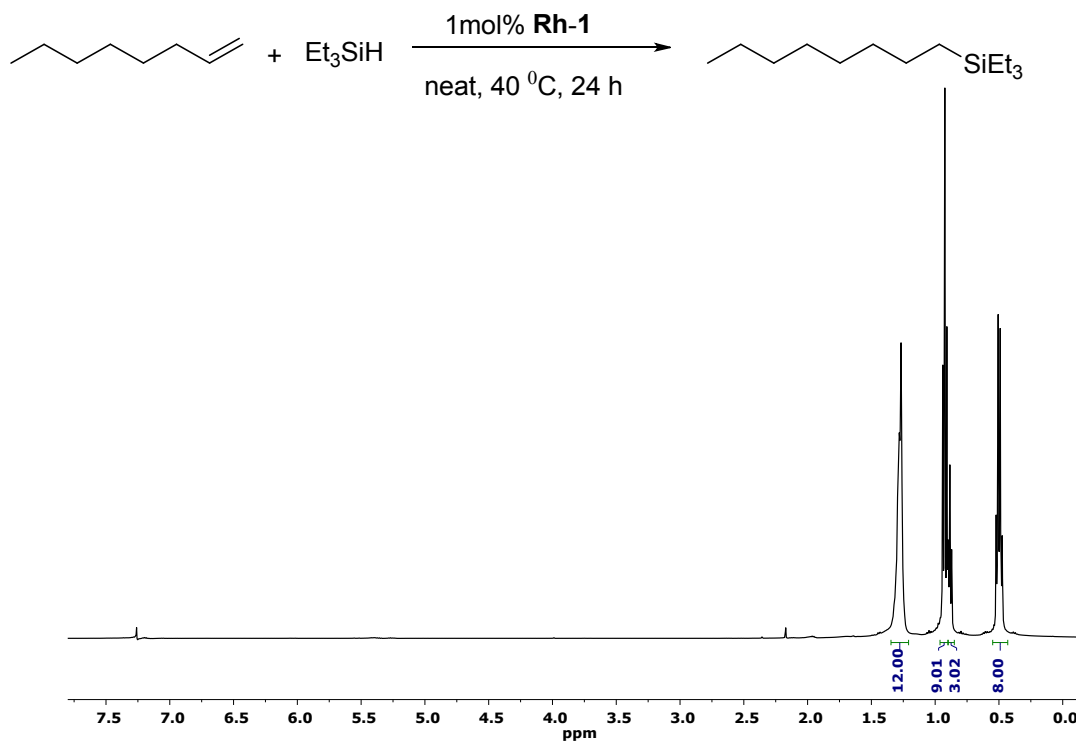

Figure S29.  $^1\text{H}$  NMR spectrum (500 MHz,  $\text{CDCl}_3$ , 293 K).

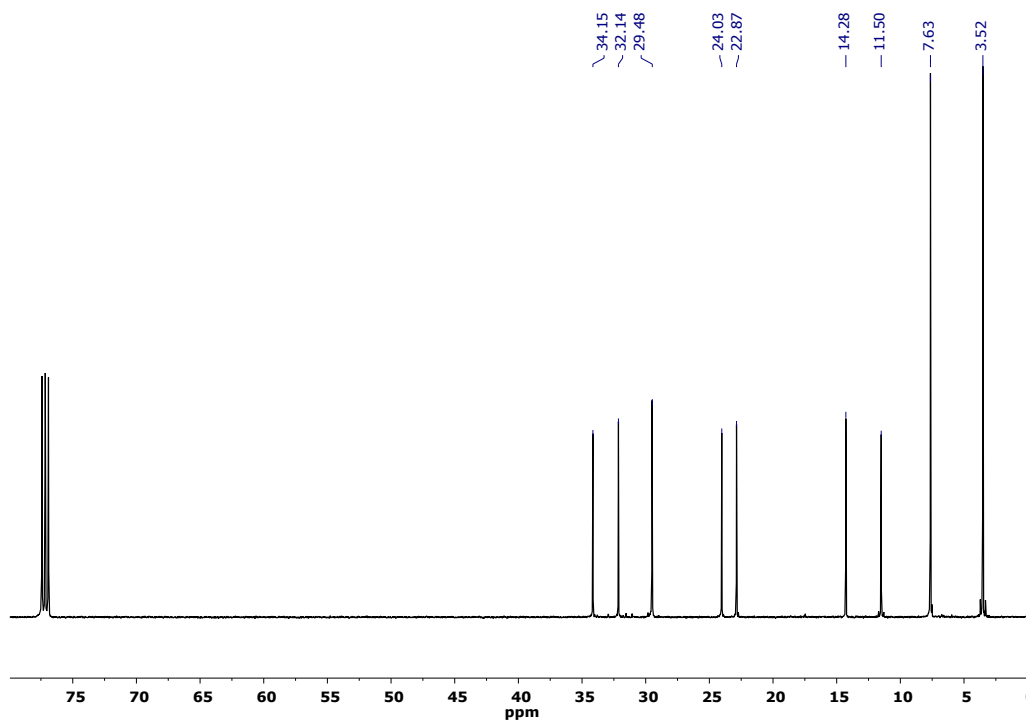

Figure S30.  $^{13}\text{C}\{^1\text{H}\}$  NMR spectrum (125.76 MHz,  $\text{CDCl}_3$ , 293 K).

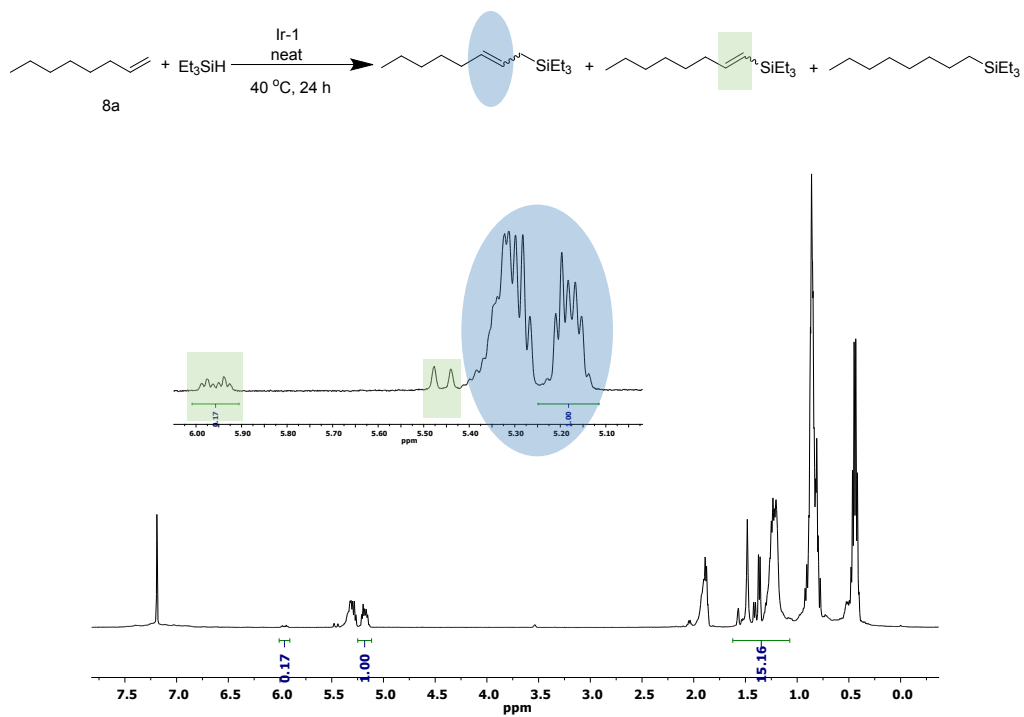

Figure S31.  $^1\text{H}$  NMR spectrum (500 MHz,  $\text{CDCl}_3$ , 293 K).

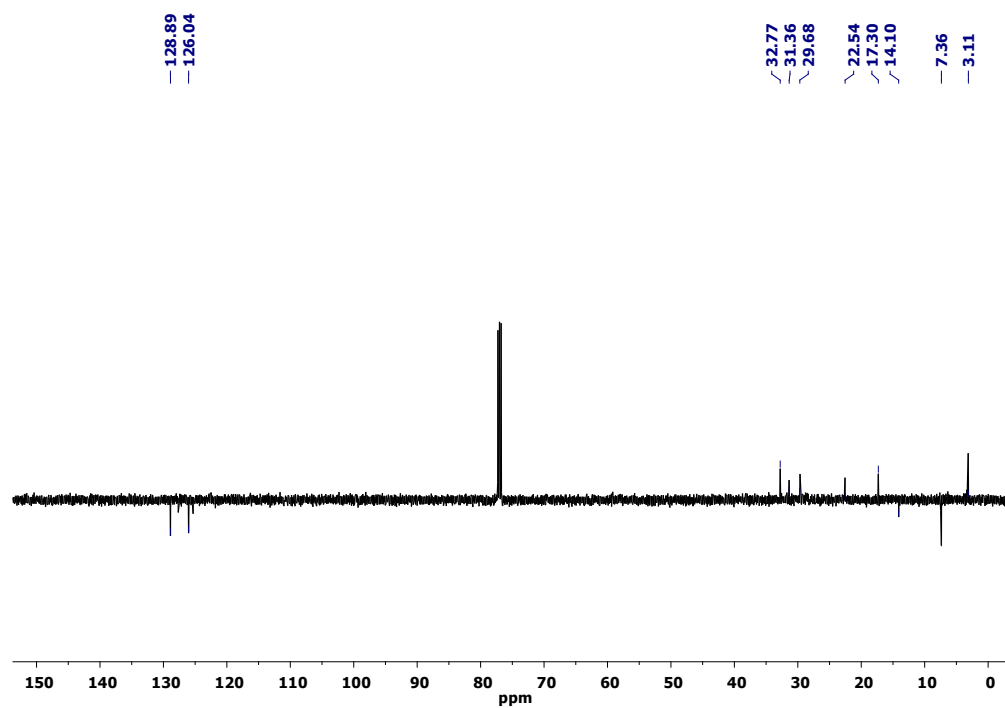

Figure S32.  $^{13}\text{C}\{^1\text{H}\}$  APT NMR spectrum (125.76 MHz,  $\text{CDCl}_3$ , 293 K).

## 9.8 NMR spectra of the catalytic hydrosilylation of 3,3-dimethyl-1-butene with $\text{Et}_3\text{SiH}$

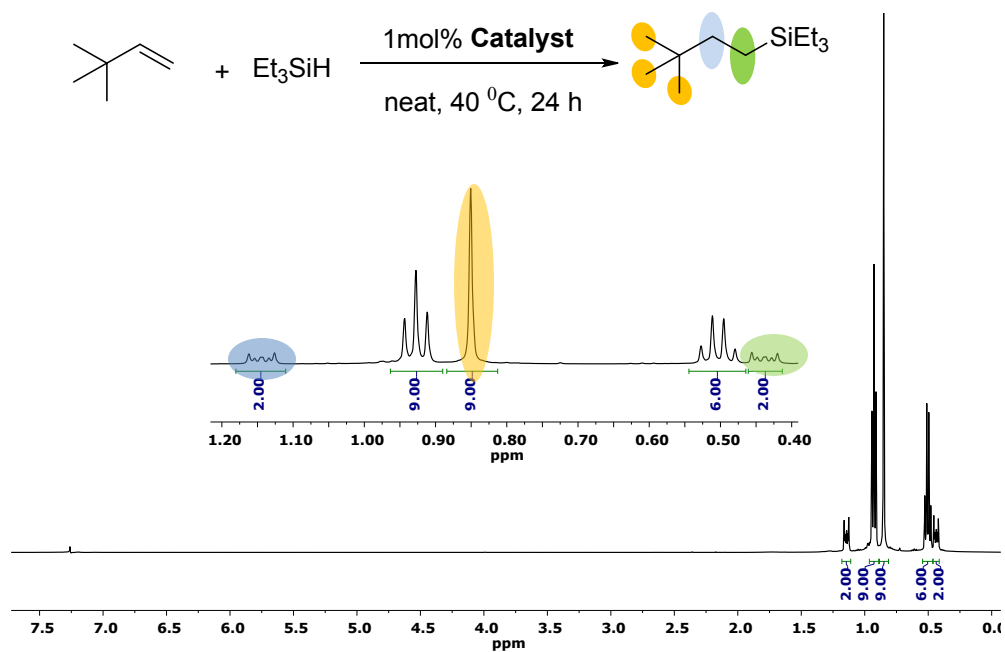

Figure S33.  $^1\text{H}$  NMR spectrum (500 MHz,  $\text{CDCl}_3$ , 293 K) obtained using **Rh-1** as catalyst.

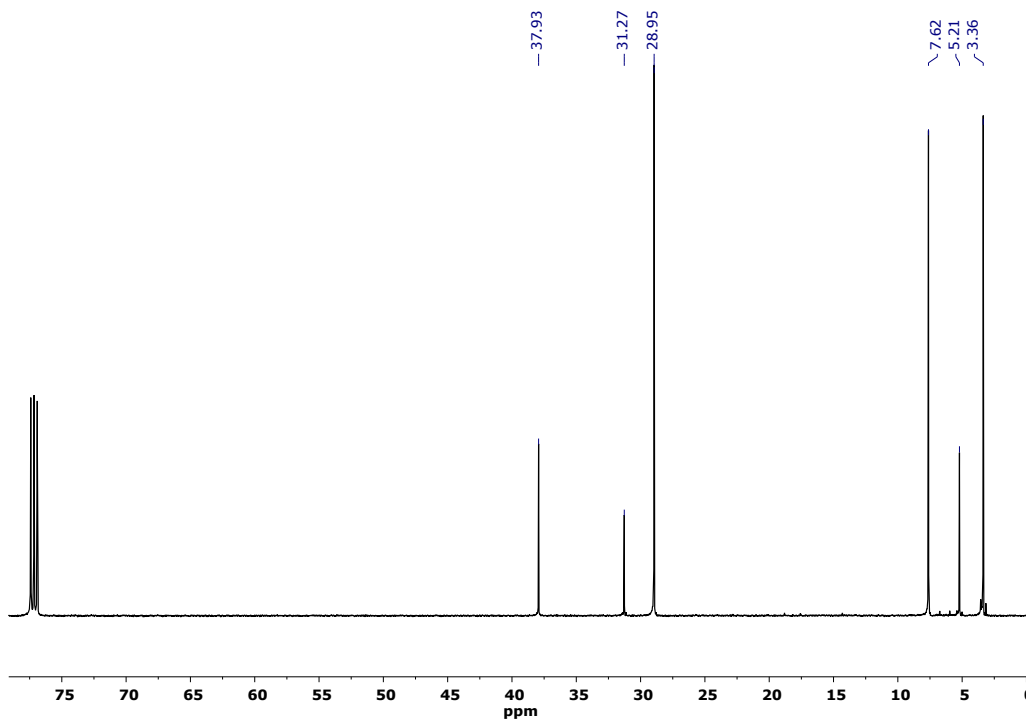

Figure S34.  $^{13}\text{C}\{^1\text{H}\}$  NMR spectrum (125.76 MHz,  $\text{CDCl}_3$ , 293 K) obtained for **Rh-1** catalyst.



### 9.9 NMR spectra of the catalytic hydrosilylation of allylbenzene with Et<sub>3</sub>SiH

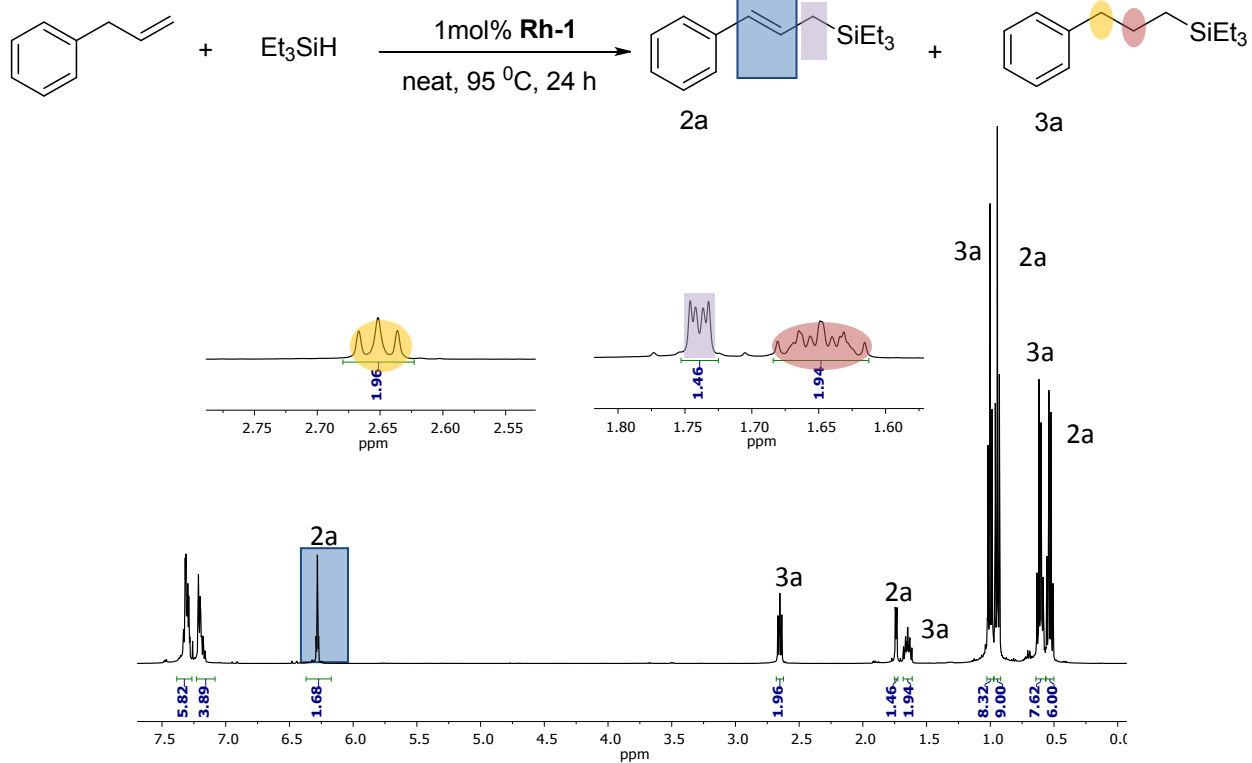

Figure S35. <sup>1</sup>H NMR spectrum (500 MHz, CDCl<sub>3</sub>, 293 K).

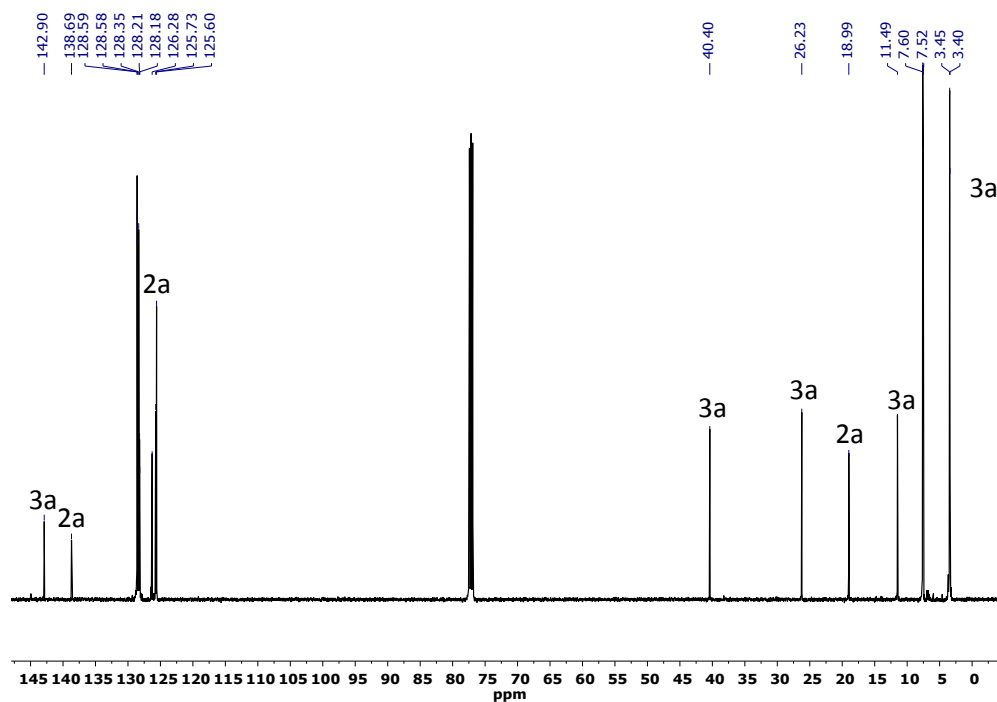

Figure S36. <sup>13</sup>C{<sup>1</sup>H} NMR spectrum (125.76 MHz, CDCl<sub>3</sub>, 293 K).

## 9.10 NMR spectra of the catalytic hydrosilylation of styrene with $(\text{EtO})_3\text{SiH}$

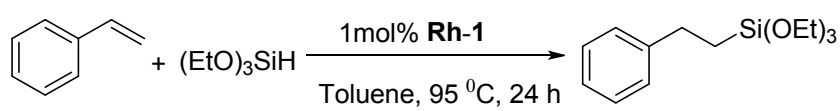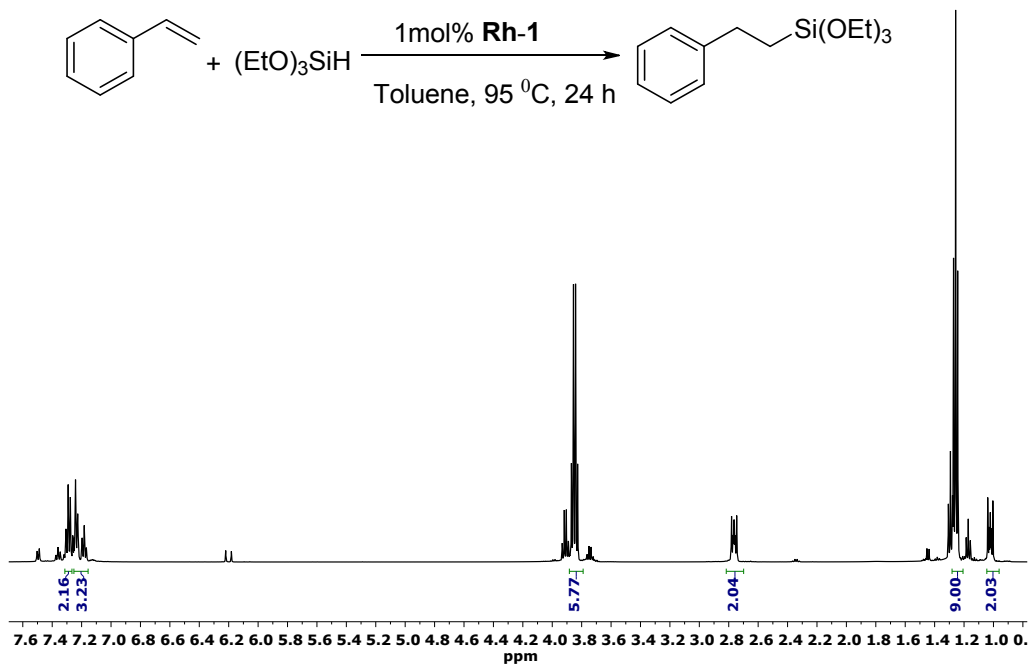

Figure S37.  $^1\text{H}$  NMR spectrum (500 MHz,  $\text{CDCl}_3$ , 293 K)

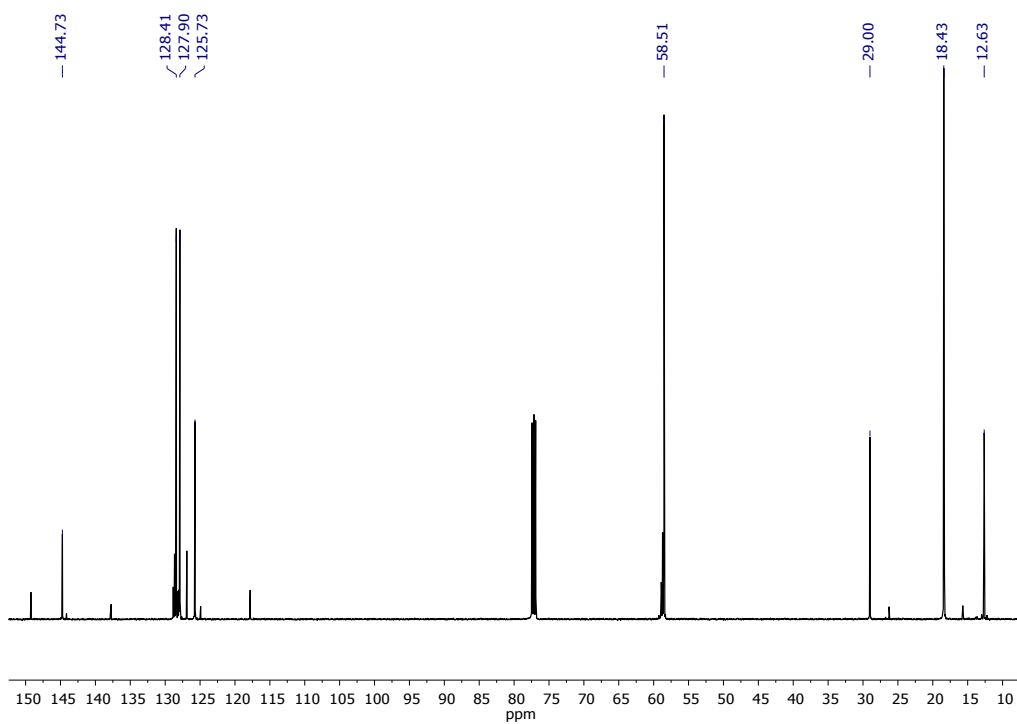

Figure S38.  $^{13}\text{C}\{^1\text{H}\}$  NMR spectrum (125.76 MHz,  $\text{CDCl}_3$ , 293 K)

## 9.11 NMR spectra of the catalytic hydrosilylation of 1-hexene with $(\text{EtO})_3\text{SiH}$

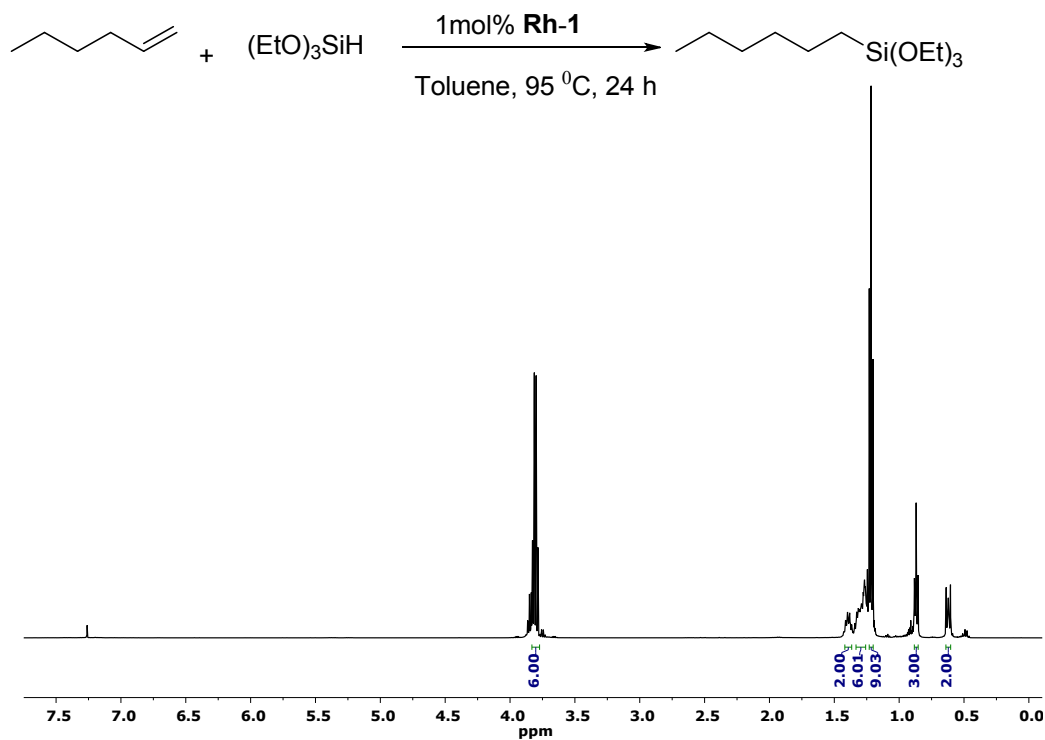

Figure S39.  $^1\text{H}$  NMR spectrum (500 MHz,  $\text{CDCl}_3$ , 293 K) 1-

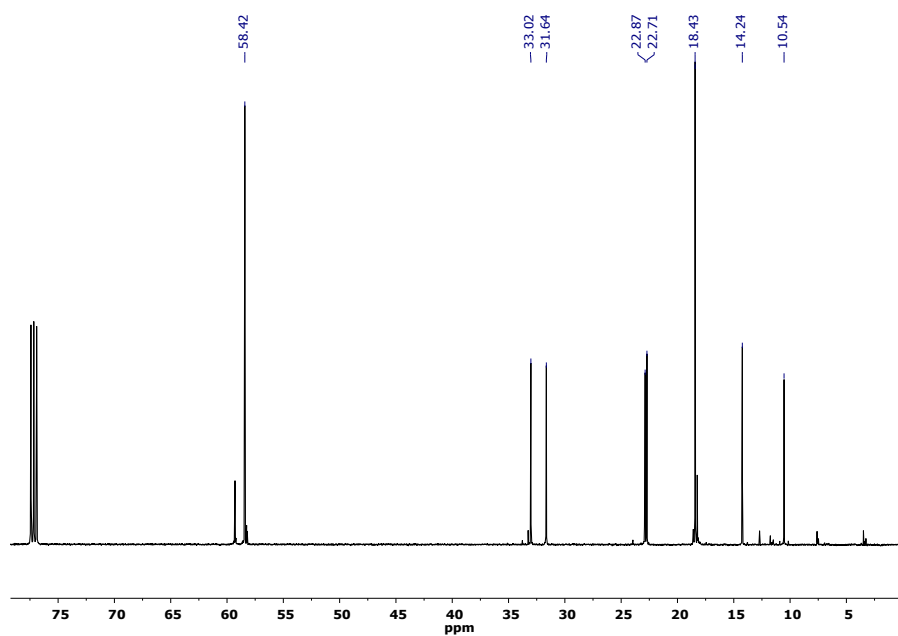

Figure S40.  $^{13}\text{C}\{^1\text{H}\}$  NMR spectrum (125.76 MHz,  $\text{CDCl}_3$ , 298 K)

## 9.12 NMR spectra of the catalytic hydrosilylation of styrene with $(\text{EtO})_2\text{MeSiH}$

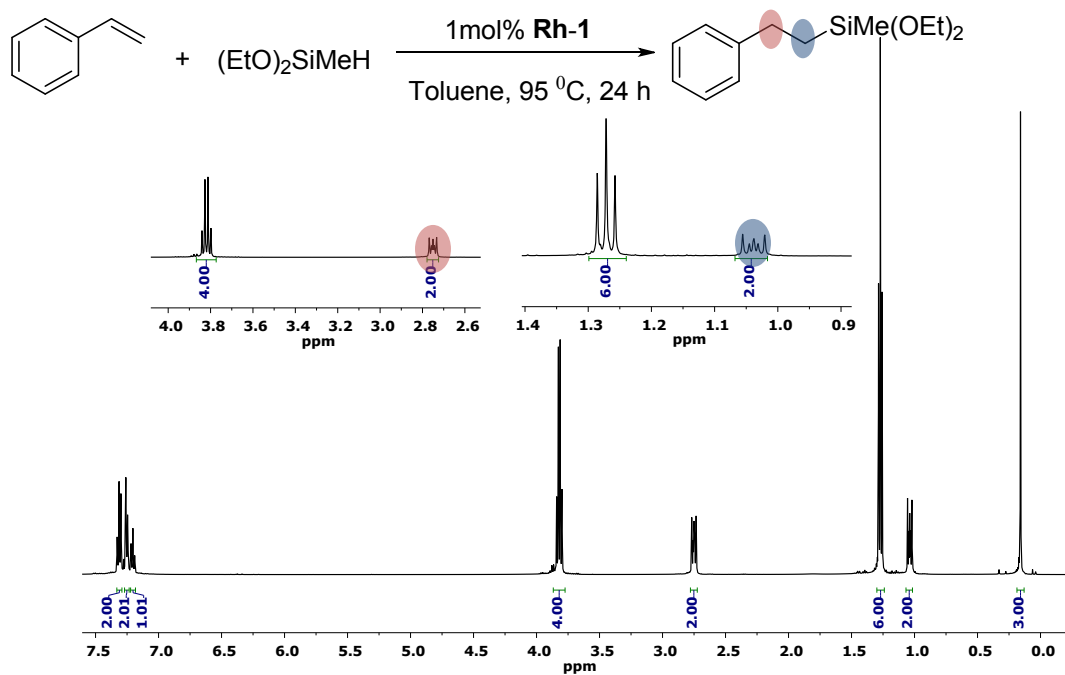

Figure S41.  $^1\text{H}$  NMR spectrum (500 MHz,  $\text{CDCl}_3$ , 293 K) Styrene

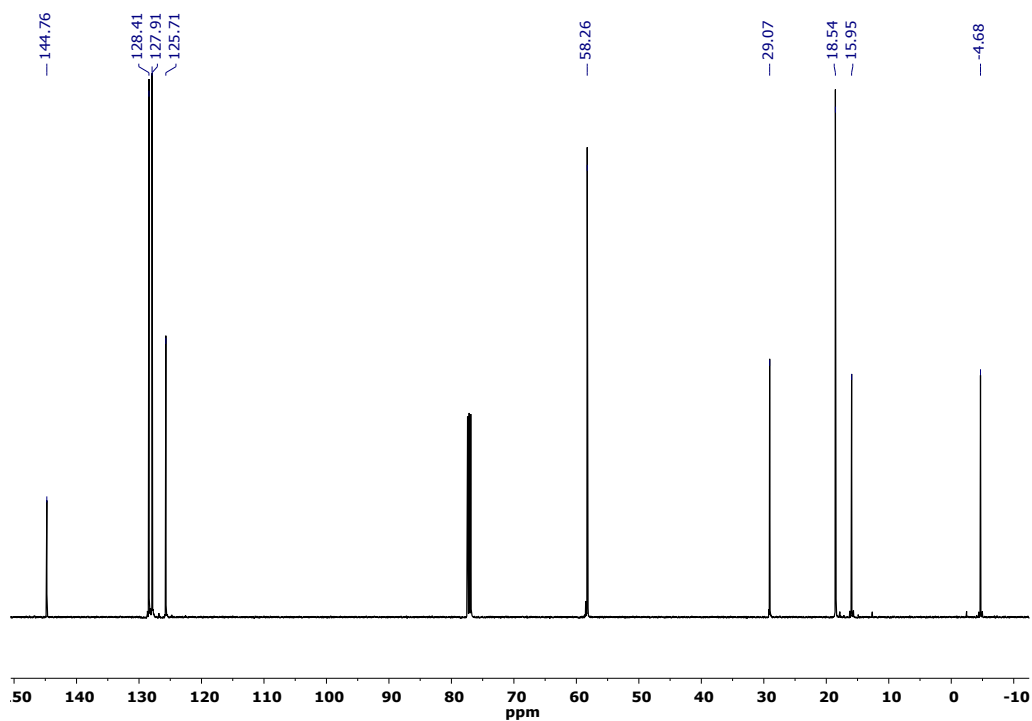

Figure S42.  $^{13}\text{C}\{^1\text{H}\}$  NMR spectrum (125.76 MHz,  $\text{CDCl}_3$ , 293 K) Styrene

### 9.13 NMR spectra of catalytic hydrosilylation of 1-hexene with (EtO)<sub>2</sub>MeSiH

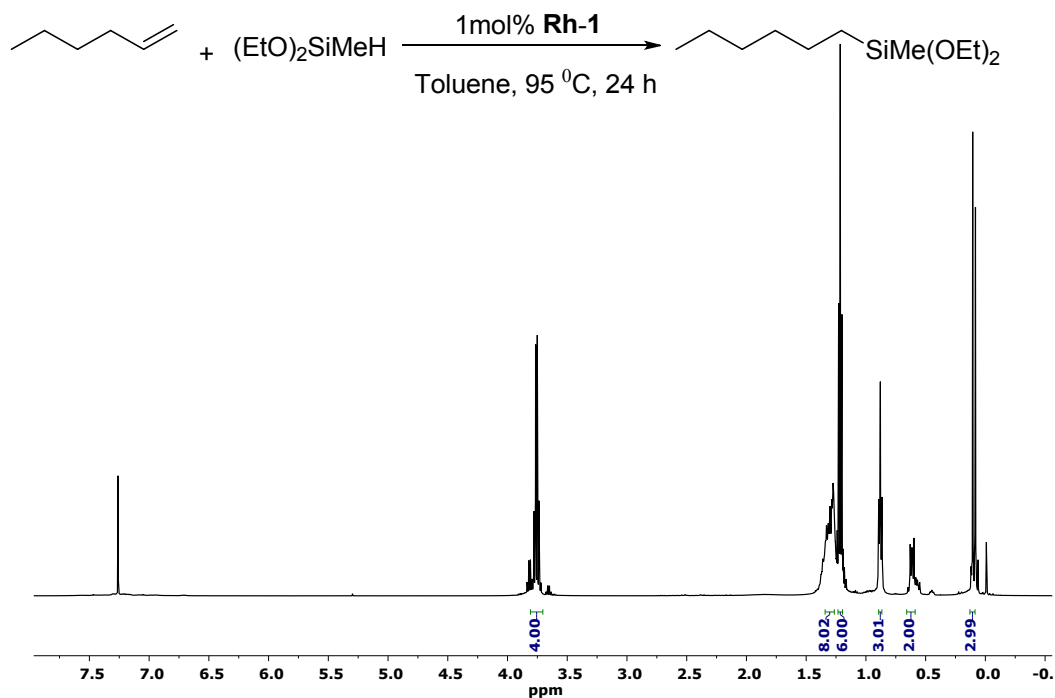

Figure S43. <sup>1</sup>H NMR spectrum (500 MHz, CDCl<sub>3</sub>, 293 K)

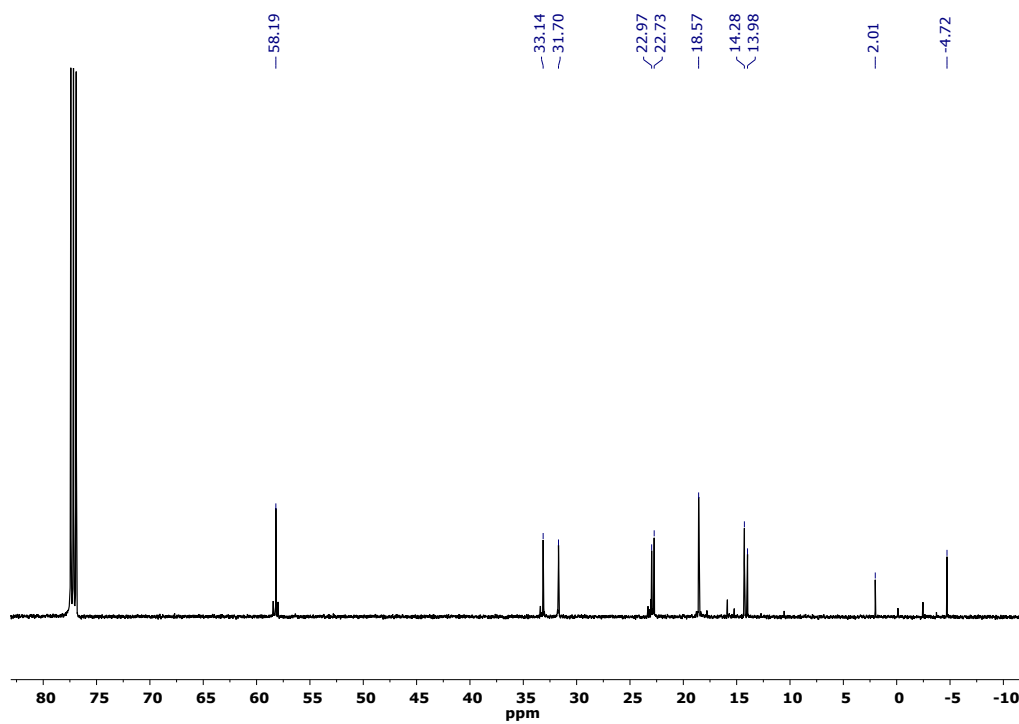

Figure S44. <sup>13</sup>C{<sup>1</sup>H} NMR spectrum (125.76 MHz, CDCl<sub>3</sub>, 293 K)

## 9.14 NMR spectra of catalytic hydrosilylation of styrene with $(\text{Me}_3\text{SiO})_2\text{SiMeH}$

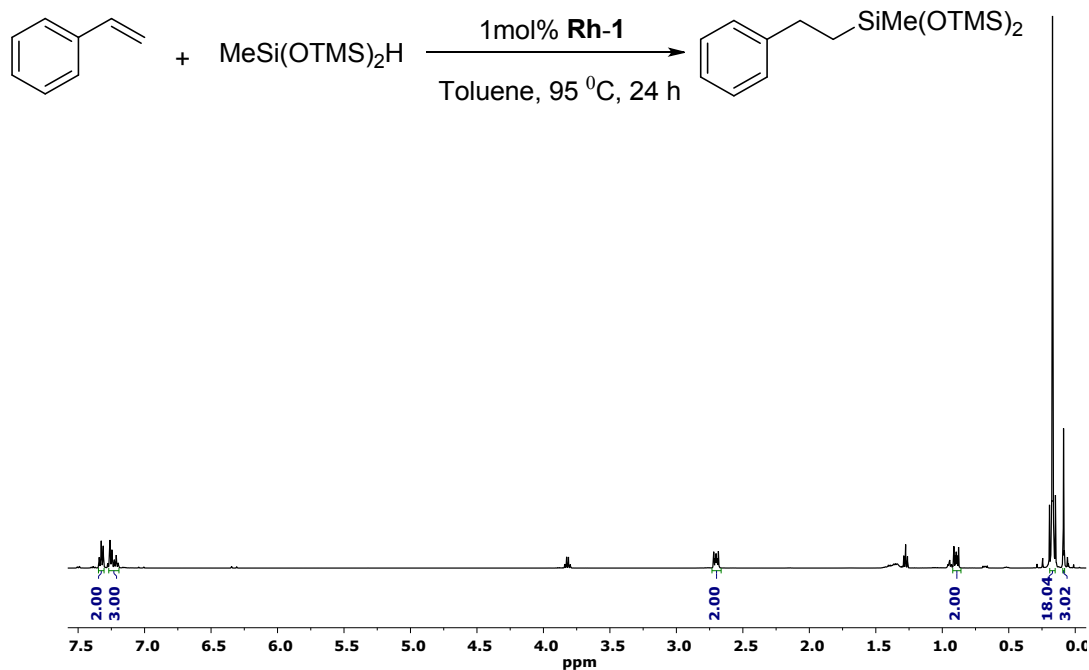

Figure S45.  $^1\text{H}$  NMR spectrum (500 MHz,  $\text{CDCl}_3$ , 293 K) Styrene

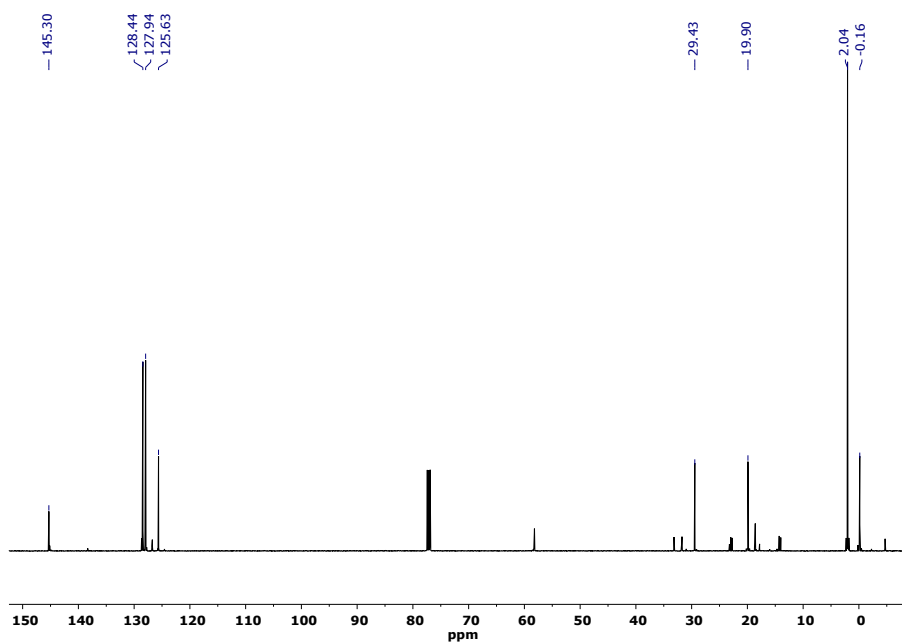

Figure S46.  $^{13}\text{C}\{^1\text{H}\}$  NMR spectrum (125.76 MHz,  $\text{CDCl}_3$ , 293 K) Styrene

### 9.15 NMR spectra of catalytic hydrosilylation of 1-hexene with $(\text{Me}_3\text{SiO})_2\text{SiMeH}$

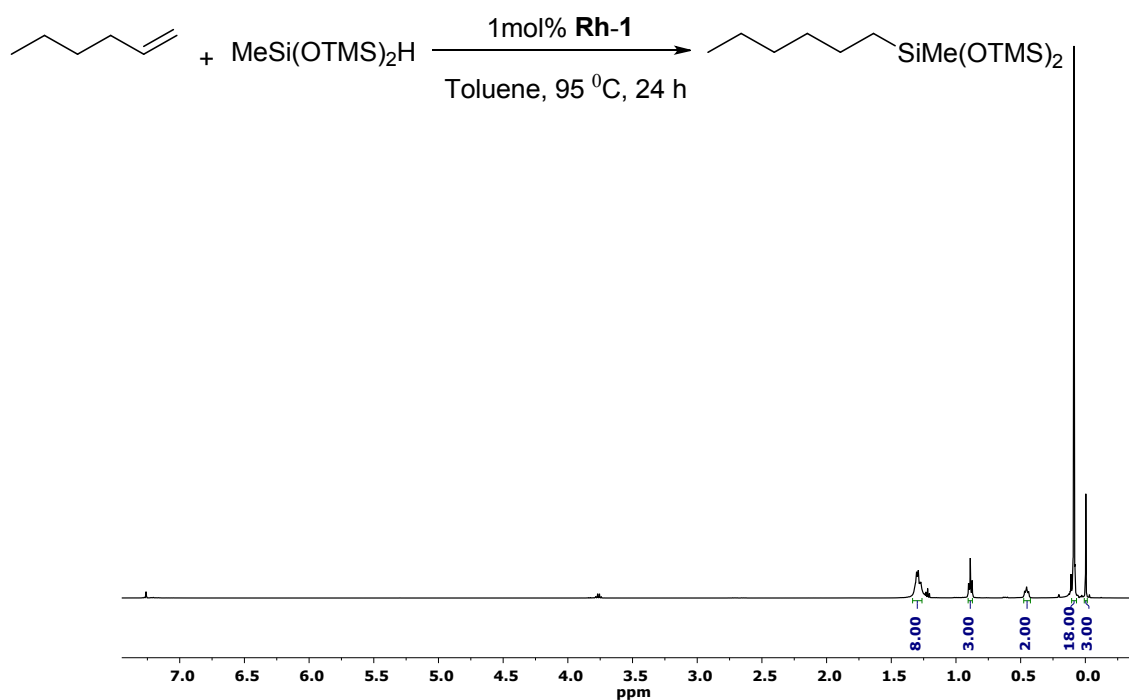

Figure S47.  $^1\text{H}$  NMR spectrum (500 MHz,  $\text{CDCl}_3$ , 293 K) 1-hexene

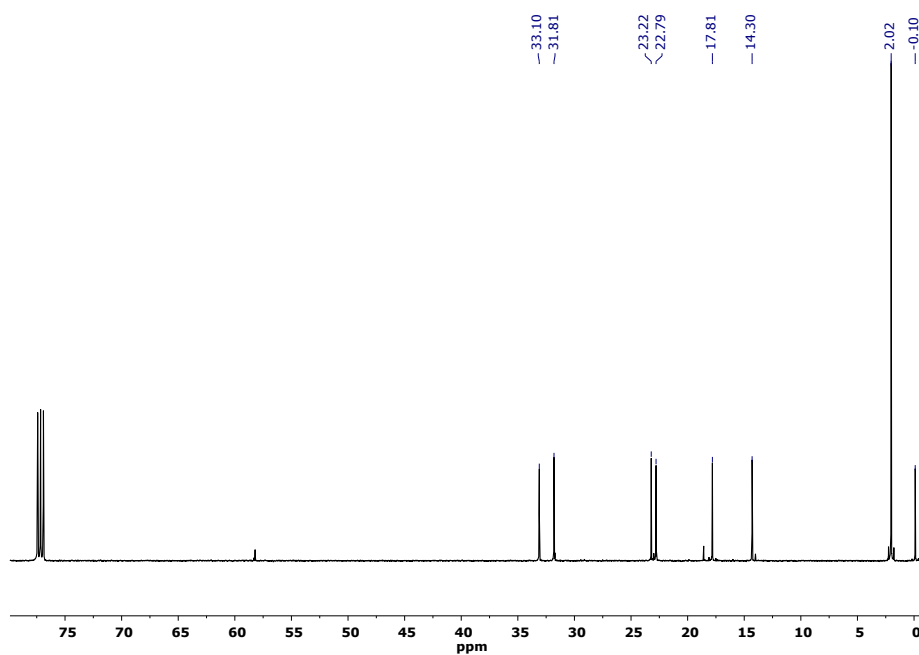

Figure S48.  $^{13}\text{C}\{^1\text{H}\}$  NMR spectrum (125.76 MHz,  $\text{CDCl}_3$ , 293 K) 1-hexene

## 9.16 NMR spectra of the catalysis of 2,3-dimethyl-1,4-butadiene with $\text{Et}_3\text{SiH}$

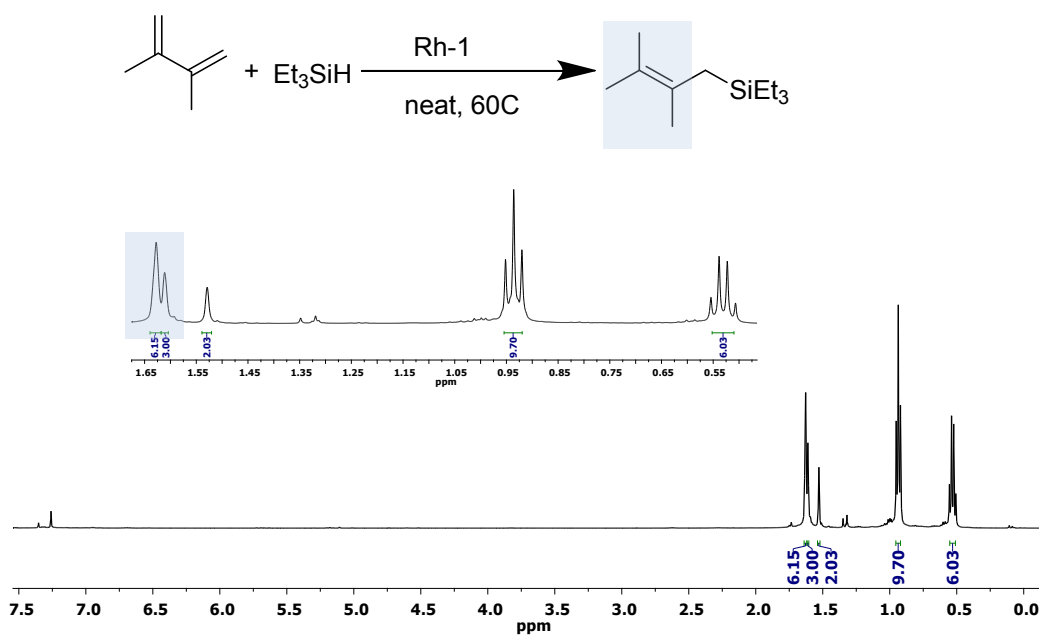

Figure S49.  $^1\text{H}$  NMR spectrum (500 MHz,  $\text{CDCl}_3$ , 293 K).

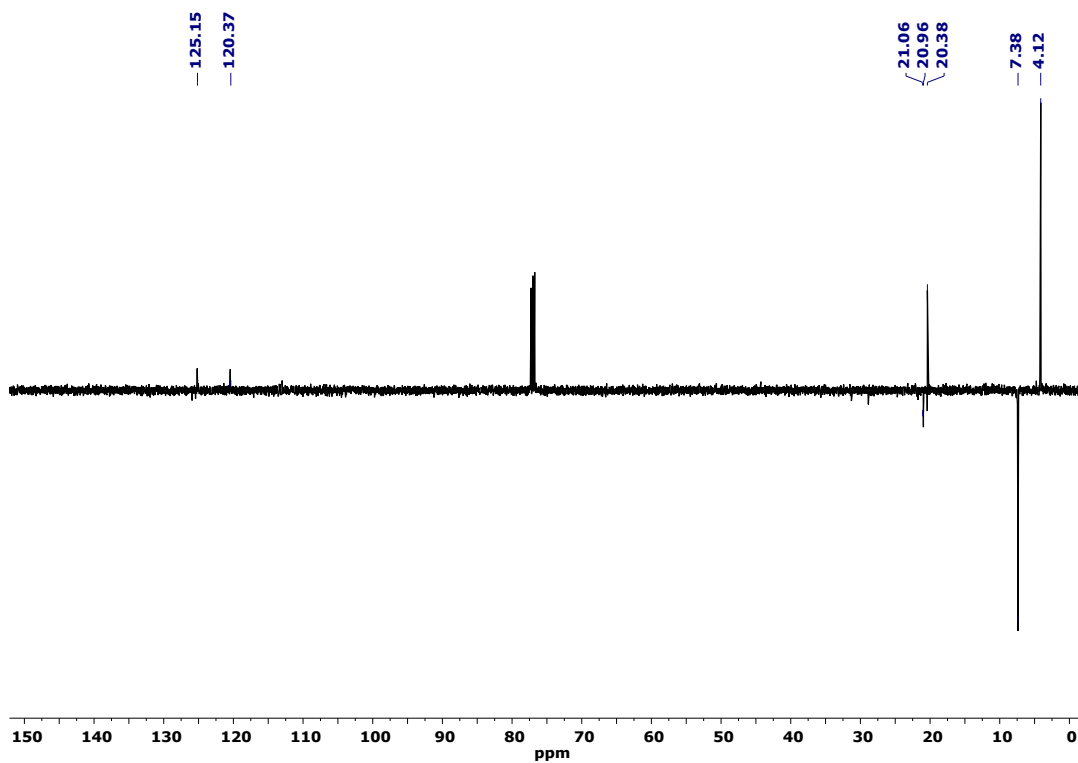

Figure S50.  $^{13}\text{C}\{^1\text{H}\}$  APT NMR spectrum (125.76 MHz,  $\text{CDCl}_3$ , 293 K).



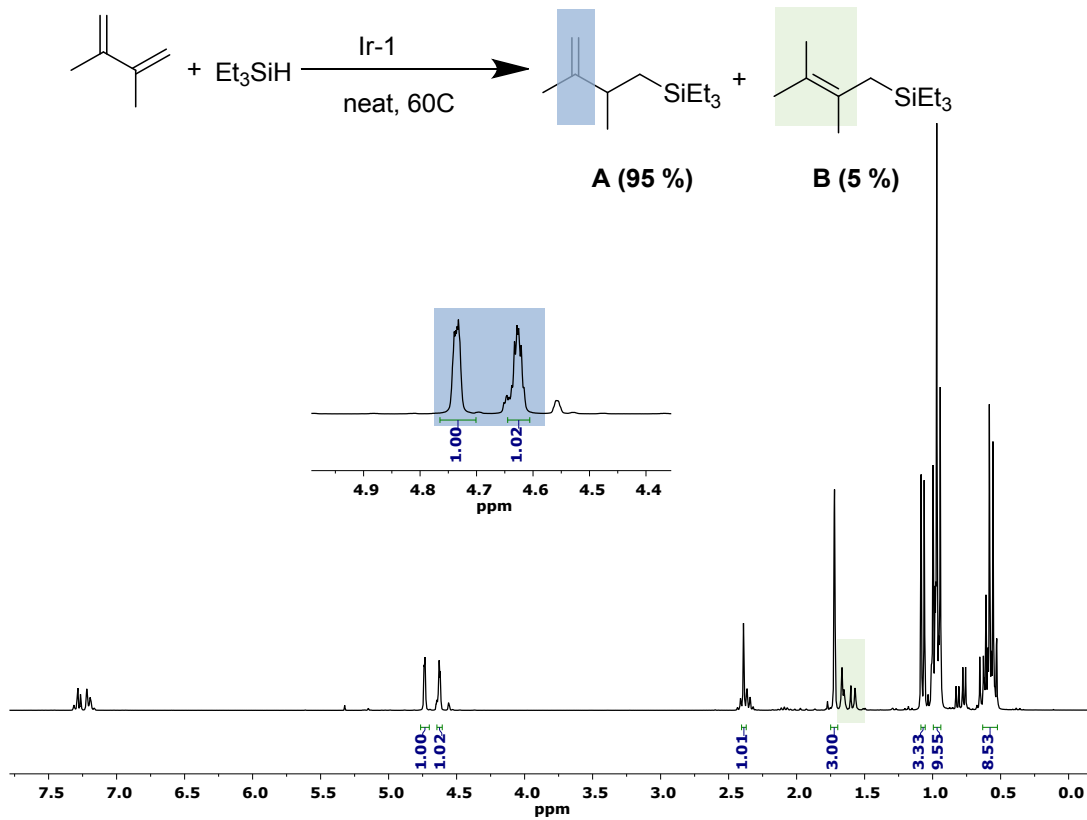

Figure S49.  $^1\text{H}$  NMR spectrum (500 MHz,  $\text{CDCl}_3$ , 293 K).

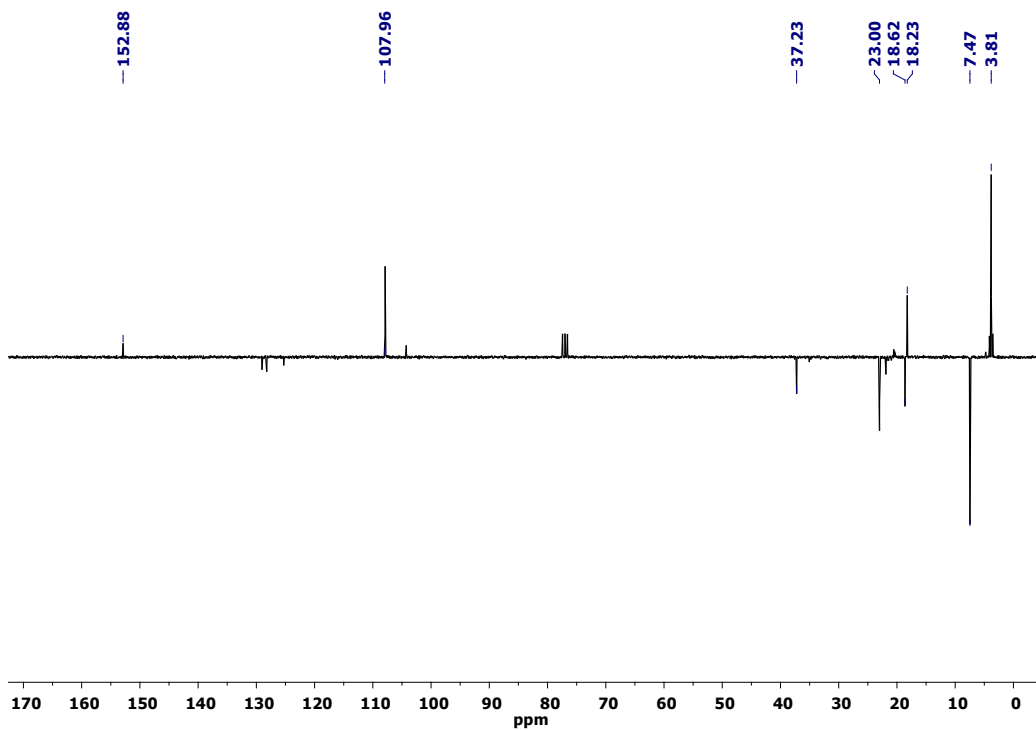

Figure S50.  $^{13}\text{C}\{^1\text{H}\}$  APT NMR spectrum (125.76 MHz,  $\text{CDCl}_3$ , 293 K).

## 10 X-ray diffraction analysis data for the complexes

### 10.1 Crystal data of Rh-2

#### 10.1.1 Crystal Structure Report for B\_VM\_040

A yellow prism like single crystal of  $C_{32}H_{45}BrPRhSi_2$ , approximate dimensions (0.293x0.452x0.579) mm<sup>3</sup>, was selected for the X-ray crystallographic analysis and mounted on a cryoloop using an oil cryoprotectant. The X-ray intensity data was measured at low temperature (T = 100K), using a three circles goniometer Kappa geometry with a fixed Kappa angle at = 54.74 deg Bruker AXS D8 Venture, equipped with a Photon 100 CMOS active pixel sensor detector. A monochromatized Mo X-ray radiation ( $\lambda = 0.71073 \text{ \AA}$ ) was selected for the measurement.

Frames were integrated with the Bruker SAINT software package using a narrow-frame algorithm.<sup>13</sup> The integration of the data using a tetragonal unit cell yielded a total of 40461 reflections to a maximum  $\theta$  angle of 27.57° (0.77 Å resolution), of which 6936 were independent (average redundancy 5.833, completeness = 99.8%,  $R_{int} = 3.26\%$ ,  $R_{sig} = 3.18\%$ ) and 6838 (98.59%) were greater than  $2\sigma$  ( $F^2$ ). The final cell constants of  $a = 11.4574(11) \text{ \AA}$ ,  $b = 11.4574(11) \text{ \AA}$ ,  $c = 24.066(4) \text{ \AA}$ , volume = 3159.2(8) Å<sup>3</sup>, are based upon the refinement of the XYZ-centroids of 1105 reflections above  $20 \sigma$  (I) with  $4.909 < 2\theta < 55.15^\circ$ . Data were corrected for absorption effects using the Multi-Scan method (SADABS).<sup>14</sup> The ratio of minimum to maximum apparent transmission was 0.657. The calculated minimum and maximum transmission coefficients (based on crystal size) are 0.3980 and 0.5990.

The structure was solved in an Tetragonal unit cell and refined using the Bruker SHELXTL Software Package, using the chiral space group P 4(1), with Z = 4 for the formula unit,  $C_{32}H_{45}BrPRhSi_2$ . Using the Bruker SHELXT Software Package<sup>15</sup>, refinement of the structure was carried out by least squares procedures on weighted  $F^2$  values using the SHELXTL-2018/3<sup>16</sup> included in the APEX3 v2019, 1.0, AXS Bruker program.<sup>17</sup> Hydrogen atoms were localized on difference Fourier maps but then introduced in the refinement as fixed contributors in idealized geometry with an isotropic thermal parameters fixed at 20 % higher than those carbons atoms they were connected. The final anisotropic full-matrix least-squares refinement on  $F^2$  with 344 variables converged at  $R1 = 1.69\%$ , for the observed data and  $wR2 = 4.06\%$  for all data. The goodness-of-fit was 1.051. The largest peak in the final difference electron density synthesis was 0.542 e<sup>-</sup>

$\text{\AA}^3$  and the largest whole was  $-0.337 \text{ e}^-/\text{\AA}^3$  with an RMS deviation of  $0.052 \text{ e}^-/\text{\AA}^3$ . On the basis of the final model, the calculated density was  $1.471 \text{ g/cm}^3$  and  $F(000)$ ,  $1440 \text{ e}^-$ . The Flack's was refined as a Racemic Twinning.<sup>18</sup> Graphics were performed using softwares: Mercury V.4.2.0: (<https://www.ccdc.cam.ac.uk/>) and POV-Ray v 3.7: (The Persistence of Vision Raytracer, high quality, Free Software tool).

### 10.1.2 Crystal's view

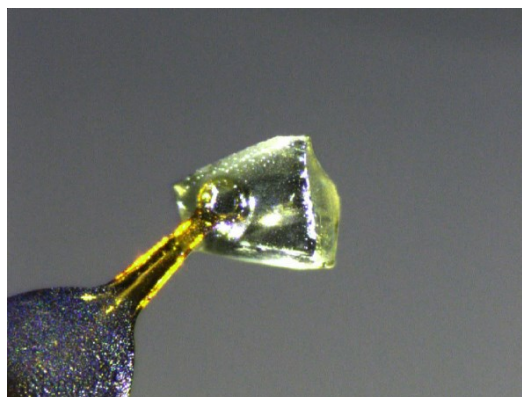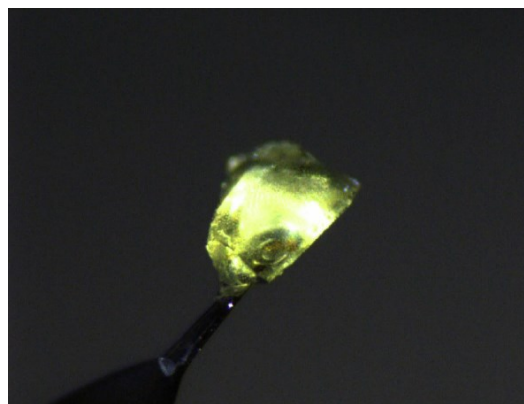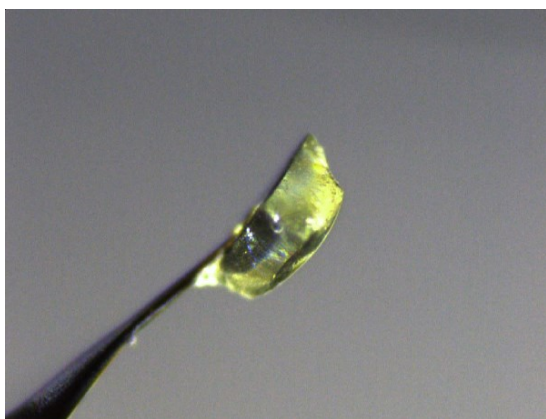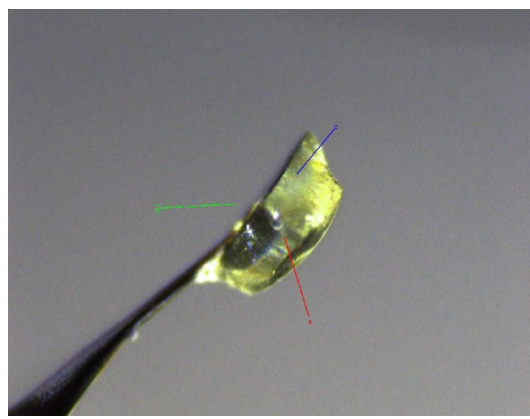

### 10.1.3 Asymmetric unit's view

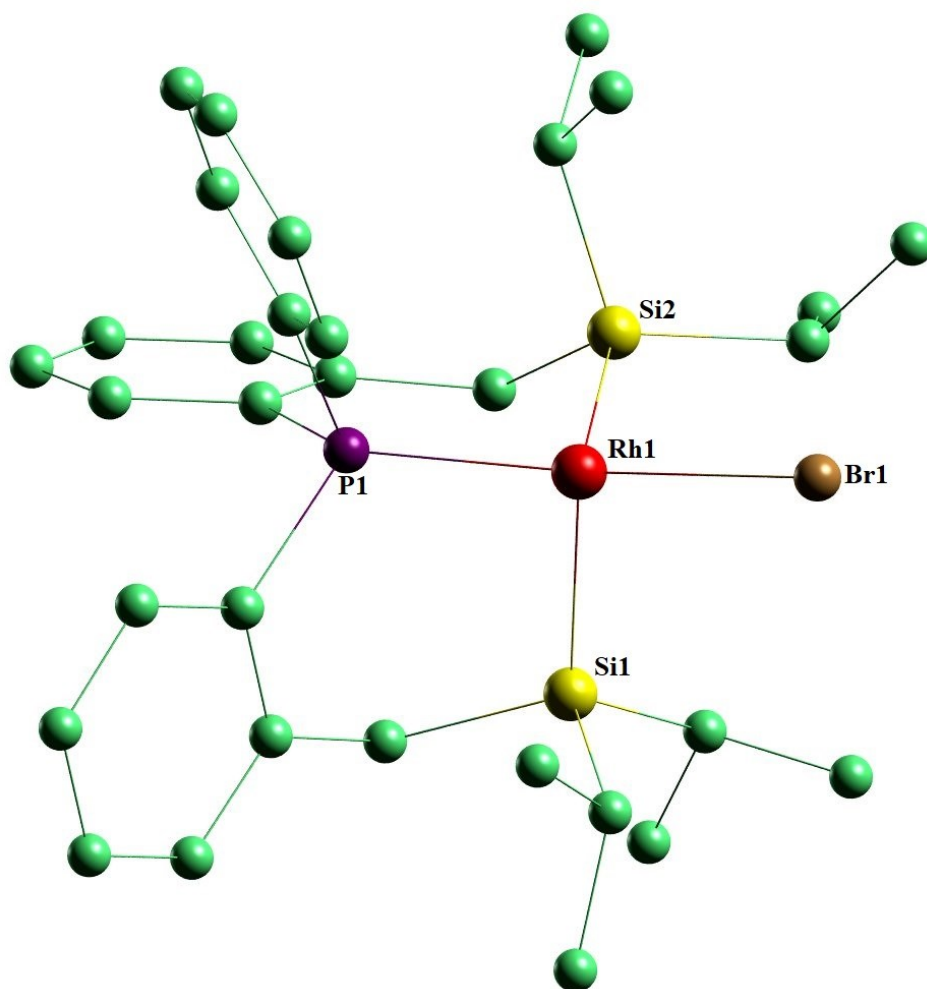

Asymmetric unit view of complex **Rh-2**.

Table S9. Sample and crystal data for B\_VM\_040.

---

|                     |                         |
|---------------------|-------------------------|
| Identification code | vm040                   |
| Chemical formula    | $C_{32}H_{45}BrPRhSi_2$ |
| Formula weight      | 699.65 g/mol            |
| Temperature         | 100(2) K                |

|                               |                                         |         |
|-------------------------------|-----------------------------------------|---------|
| <b>Wavelength</b>             | 0.71073 Å                               |         |
| <b>Crystal size</b>           | (0.293 x 0.452 x 0.579) mm <sup>3</sup> |         |
| <b>Crystal system</b>         | tetragonal                              |         |
| <b>Space group</b>            | P 4(1)                                  |         |
| <b>Unit cell dimensions</b>   | a = 11.4574(11) Å                       | α = 90° |
|                               | b = 11.4574(11) Å                       | β = 90° |
|                               | c = 24.066(4) Å                         | γ = 90° |
| <b>Volume</b>                 | 3159.2(8) Å <sup>3</sup>                |         |
| <b>Z</b>                      | 4                                       |         |
| <b>Density (calculated)</b>   | 1.471 g/cm <sup>3</sup>                 |         |
| <b>Absorption coefficient</b> | 1.952 mm <sup>-1</sup>                  |         |
| <b>F(000)</b>                 | 1440                                    |         |

**Table S10. Data collection and structure refinement for B\_VM\_040.**

---

|                                        |                                             |
|----------------------------------------|---------------------------------------------|
| <b>Theta range for data collection</b> | 1.97 to 27.57°                              |
| <b>Index ranges</b>                    | -14 ≤ h ≤ 14, -14 ≤ k ≤ 14, -31 ≤ l ≤ 31    |
| <b>Reflections collected</b>           | 40461                                       |
| <b>Independent reflections</b>         | 6936 [R(int) = 0.0326]                      |
| <b>Max. and min. transmission</b>      | 0.5990 and 0.3980                           |
| <b>Structure solution technique</b>    | direct methods                              |
| <b>Structure solution program</b>      | SHELXT                                      |
| <b>Refinement method</b>               | Full-matrix least-squares on F <sup>2</sup> |
| <b>Refinement program</b>              | SHELXTL-2018/3                              |
| <b>Function minimized</b>              | $\sum w (F_o^2 - F_c^2)^2$                  |

Data / restraints / parameters 6936 / 1 / 344

Goodness-of-fit on  $F^2$  1.051

$\Delta/\sigma_{\max}$  0.001

Final R indices 6838 data; R1 = 0.0169, wR2 = 0.0405  
 $I > 2\sigma(I)$

all data R1 = 0.0172, wR2 = 0.0406

Weighting scheme  $w = 1/[\sigma^2(F_o^2) + (0.0179P)^2 + 0.2739P]$

where  $P = (F_o^2 + 2F_c^2)/3$

Absolute structure parameter 0.052(6)

Extinction coefficient 0.0030(2)

Largest diff. peak and hole 0.542 and -0.337  $e\text{\AA}^{-3}$

R.M.S. deviation from mean 0.052  $e\text{\AA}^{-3}$

Table S11. Bond lengths ( $\text{\AA}$ ) for B\_VM\_040.

---

|         |           |         |           |
|---------|-----------|---------|-----------|
| Rh1-P1  | 2.2050(7) | Rh1-Si2 | 2.2865(7) |
| Rh1-Si1 | 2.2882(7) | Rh1-Br1 | 2.4349(5) |
| P1-C15  | 1.817(2)  | P1-C7   | 1.820(2)  |
| P1-C8   | 1.824(3)  | Si1-C24 | 1.895(3)  |
| Si1-C1  | 1.904(2)  | Si1-C21 | 1.904(2)  |
| Si2-C14 | 1.888(3)  | Si2-C30 | 1.897(2)  |
| Si2-C27 | 1.914(3)  | C1-C2   | 1.497(3)  |
| C1-H1A  | 0.99      | C1-H1B  | 0.99      |
| C2-C3   | 1.394(4)  | C2-C7   | 1.404(3)  |
| C3-C4   | 1.381(4)  | C3-H3   | 0.95      |
| C4-C5   | 1.378(4)  | C4-H4   | 0.95      |
| C5-C6   | 1.386(4)  | C5-H5   | 0.95      |

|          |          |          |          |
|----------|----------|----------|----------|
| C6-C7    | 1.400(3) | C6-H6    | 0.95     |
| C8-C13   | 1.405(3) | C8-C9    | 1.409(4) |
| C9-C10   | 1.378(4) | C9-H9    | 0.95     |
| C10-C11  | 1.381(4) | C10-H10  | 0.95     |
| C11-C12  | 1.380(4) | C11-H11  | 0.95     |
| C12-C13  | 1.404(3) | C12-H12  | 0.95     |
| C13-C14  | 1.506(3) | C14-H14A | 0.99     |
| C14-H14B | 0.99     | C15-C16  | 1.391(3) |
| C15-C20  | 1.405(4) | C16-C17  | 1.395(3) |
| C16-H16  | 0.95     | C17-C18  | 1.377(4) |
| C17-H17  | 0.95     | C18-C19  | 1.385(4) |
| C18-H18  | 0.95     | C19-C20  | 1.385(4) |
| C19-H19  | 0.95     | C20-H20  | 0.95     |
| C21-C23  | 1.526(4) | C21-C22  | 1.537(3) |
| C21-H21  | 1.0      | C22-H22A | 0.98     |
| C22-H22B | 0.98     | C22-H22C | 0.98     |
| C23-H23A | 0.98     | C23-H23B | 0.98     |
| C23-H23C | 0.98     | C24-C26  | 1.527(4) |
| C24-C25  | 1.534(4) | C24-H24  | 1.0      |
| C25-H25A | 0.98     | C25-H25B | 0.98     |
| C25-H25C | 0.98     | C26-H26A | 0.98     |
| C26-H26B | 0.98     | C26-H26C | 0.98     |
| C27-C28  | 1.526(4) | C27-C29  | 1.536(4) |
| C27-H27  | 1.0      | C28-H28A | 0.98     |
| C28-H28B | 0.98     | C28-H28C | 0.98     |
| C29-H29A | 0.98     | C29-H29B | 0.98     |
| C29-H29C | 0.98     | C30-C32  | 1.531(4) |

|          |          |          |      |
|----------|----------|----------|------|
| C30-C31  | 1.538(4) | C30-H30  | 1.0  |
| C31-H31A | 0.98     | C31-H31B | 0.98 |
| C31-H31C | 0.98     | C32-H32A | 0.98 |
| C32-H32B | 0.98     | C32-H32C | 0.98 |

**Table S12. Bond angles (°) for B\_VM\_040.**

---

|             |             |             |             |
|-------------|-------------|-------------|-------------|
| P1-Rh1-Si2  | 87.83(2)    | P1-Rh1-Si1  | 89.05(2)    |
| Si2-Rh1-Si1 | 100.11(2)   | P1-Rh1-Br1  | 164.243(19) |
| Si2-Rh1-Br1 | 102.429(19) | Si1-Rh1-Br1 | 100.692(19) |
| C15-P1-C7   | 104.16(11)  | C15-P1-C8   | 105.69(11)  |
| C7-P1-C8    | 100.11(11)  | C15-P1-Rh1  | 104.63(8)   |
| C7-P1-Rh1   | 114.28(8)   | C8-P1-Rh1   | 125.96(9)   |
| C24-Si1-C1  | 108.43(11)  | C24-Si1-C21 | 110.03(12)  |
| C1-Si1-C21  | 107.36(11)  | C24-Si1-Rh1 | 100.70(9)   |
| C1-Si1-Rh1  | 113.00(8)   | C21-Si1-Rh1 | 116.94(8)   |
| C14-Si2-C30 | 105.95(11)  | C14-Si2-C27 | 107.35(11)  |
| C30-Si2-C27 | 112.92(11)  | C14-Si2-Rh1 | 111.80(8)   |
| C30-Si2-Rh1 | 106.59(8)   | C27-Si2-Rh1 | 112.13(8)   |
| C2-C1-Si1   | 113.11(17)  | C2-C1-H1A   | 109.0       |
| Si1-C1-H1A  | 109.0       | C2-C1-H1B   | 109.0       |
| Si1-C1-H1B  | 109.0       | H1A-C1-H1B  | 107.8       |
| C3-C2-C7    | 118.2(2)    | C3-C2-C1    | 121.1(2)    |
| C7-C2-C1    | 120.7(2)    | C4-C3-C2    | 121.5(3)    |
| C4-C3-H3    | 119.2       | C2-C3-H3    | 119.2       |
| C5-C4-C3    | 120.1(2)    | C5-C4-H4    | 120.0       |



|              |            |               |            |
|--------------|------------|---------------|------------|
| C3-C4-H4     | 120.0      | C4-C5-C6      | 119.8(3)   |
| C4-C5-H5     | 120.1      | C6-C5-H5      | 120.1      |
| C5-C6-C7     | 120.5(2)   | C5-C6-H6      | 119.8      |
| C7-C6-H6     | 119.8      | C6-C7-C2      | 119.8(2)   |
| C6-C7-P1     | 122.44(19) | C2-C7-P1      | 117.72(18) |
| C13-C8-C9    | 119.5(2)   | C13-C8-P1     | 124.52(19) |
| C9-C8-P1     | 115.91(19) | C10-C9-C8     | 121.5(2)   |
| C10-C9-H9    | 119.2      | C8-C9-H9      | 119.2      |
| C9-C10-C11   | 119.3(3)   | C9-C10-H10    | 120.4      |
| C11-C10-H10  | 120.4      | C12-C11-C10   | 119.9(3)   |
| C12-C11-H11  | 120.1      | C10-C11-H11   | 120.1      |
| C11-C12-C13  | 122.5(2)   | C11-C12-H12   | 118.7      |
| C13-C12-H12  | 118.7      | C12-C13-C8    | 117.2(2)   |
| C12-C13-C14  | 118.3(2)   | C8-C13-C14    | 124.4(2)   |
| C13-C14-Si2  | 118.58(17) | C13-C14-H14A  | 107.7      |
| Si2-C14-H14A | 107.7      | C13-C14-H14B  | 107.7      |
| Si2-C14-H14B | 107.7      | H14A-C14-H14B | 107.1      |
| C16-C15-C20  | 118.8(2)   | C16-C15-P1    | 124.28(19) |
| C20-C15-P1   | 116.82(18) | C15-C16-C17   | 119.9(2)   |
| C15-C16-H16  | 120.1      | C17-C16-H16   | 120.1      |
| C18-C17-C16  | 120.6(3)   | C18-C17-H17   | 119.7      |
| C16-C17-H17  | 119.7      | C17-C18-C19   | 120.2(2)   |
| C17-C18-H18  | 119.9      | C19-C18-H18   | 119.9      |
| C20-C19-C18  | 119.7(3)   | C20-C19-H19   | 120.2      |
| C18-C19-H19  | 120.2      | C19-C20-C15   | 120.8(2)   |
| C19-C20-H20  | 119.6      | C15-C20-H20   | 119.6      |
| C23-C21-C22  | 110.7(2)   | C23-C21-Si1   | 112.23(18) |

|               |            |               |            |
|---------------|------------|---------------|------------|
| C22-C21-Si1   | 112.26(17) | C23-C21-H21   | 107.1      |
| C22-C21-H21   | 107.1      | Si1-C21-H21   | 107.1      |
| C21-C22-H22A  | 109.5      | C21-C22-H22B  | 109.5      |
| H22A-C22-H22B | 109.5      | C21-C22-H22C  | 109.5      |
| H22A-C22-H22C | 109.5      | H22B-C22-H22C | 109.5      |
| C21-C23-H23A  | 109.5      | C21-C23-H23B  | 109.5      |
| H23A-C23-H23B | 109.5      | C21-C23-H23C  | 109.5      |
| H23A-C23-H23C | 109.5      | H23B-C23-H23C | 109.5      |
| C26-C24-C25   | 110.2(2)   | C26-C24-Si1   | 114.74(19) |
| C25-C24-Si1   | 111.4(2)   | C26-C24-H24   | 106.7      |
| C25-C24-H24   | 106.7      | Si1-C24-H24   | 106.7      |
| C24-C25-H25A  | 109.5      | C24-C25-H25B  | 109.5      |
| H25A-C25-H25B | 109.5      | C24-C25-H25C  | 109.5      |
| H25A-C25-H25C | 109.5      | H25B-C25-H25C | 109.5      |
| C24-C26-H26A  | 109.5      | C24-C26-H26B  | 109.5      |
| H26A-C26-H26B | 109.5      | C24-C26-H26C  | 109.5      |
| H26A-C26-H26C | 109.5      | H26B-C26-H26C | 109.5      |
| C28-C27-C29   | 109.9(2)   | C28-C27-Si2   | 114.62(18) |
| C29-C27-Si2   | 112.35(19) | C28-C27-H27   | 106.5      |
| C29-C27-H27   | 106.5      | Si2-C27-H27   | 106.5      |
| C27-C28-H28A  | 109.5      | C27-C28-H28B  | 109.5      |
| H28A-C28-H28B | 109.5      | C27-C28-H28C  | 109.5      |
| H28A-C28-H28C | 109.5      | H28B-C28-H28C | 109.5      |
| C27-C29-H29A  | 109.5      | C27-C29-H29B  | 109.5      |
| H29A-C29-H29B | 109.5      | C27-C29-H29C  | 109.5      |
| H29A-C29-H29C | 109.5      | H29B-C29-H29C | 109.5      |
| C32-C30-C31   | 111.6(2)   | C32-C30-Si2   | 112.43(18) |

|               |            |               |       |
|---------------|------------|---------------|-------|
| C31-C30-Si2   | 114.14(18) | C32-C30-H30   | 106.0 |
| C31-C30-H30   | 106.0      | Si2-C30-H30   | 106.0 |
| C30-C31-H31A  | 109.5      | C30-C31-H31B  | 109.5 |
| H31A-C31-H31B | 109.5      | C30-C31-H31C  | 109.5 |
| H31A-C31-H31C | 109.5      | H31B-C31-H31C | 109.5 |
| C30-C32-H32A  | 109.5      | C30-C32-H32B  | 109.5 |
| H32A-C32-H32B | 109.5      | C30-C32-H32C  | 109.5 |
| H32A-C32-H32C | 109.5      | H32B-C32-H32C | 109.5 |

## 10.2 Crystal data of Rh-3

### 10.2.1 Crystal Structure Report for A\_VM\_028

An orange yellow prism single crystal of  $C_{64}H_{90}I_2P_2Rh_2Si_4$ , approximate dimensions (0.102 x 0.134 x 0.278) mm<sup>3</sup>, was selected for the X-ray crystallographic analysis and mounted on a cryoloop using an oil cryoprotectant. The X-ray intensity data was measured at low temperature (T = 100K), using a three circles goniometer Kappa geometry with a fixed Kappa angle at = 54.74 deg Bruker AXS D8 Venture, equipped with a Photon 100 CMOS active pixel sensor detector. A monochromatized Copper X-ray radiation ( $\lambda = 1.54178 \text{ \AA}$ ) was selected for the measurement. All frames were integrated with the aid of the Bruker SAINT software<sup>13</sup> using a narrow-frame algorithm. The integration of the data using a triclinic unit cell yielded a total of 68424 reflections to a maximum  $\theta$  angle of 72.49° (0.81Å resolution), of which 12489 were independent (average redundancy 5.479, completeness = 98.5%,  $R_{int} = 3.58\%$ ,  $R_{sig} = 2.56\%$ ) and 11961 (95.77%) were greater than  $2\sigma (F^2)$ . The final cell constants of  $a = 9.5705(3) \text{ \AA}$ ,  $b = 17.6043(6) \text{ \AA}$ ,  $c = 19.2246(7) \text{ \AA}$ ,  $\alpha = 93.3520(10)^\circ$ ,  $\beta = 90.1870(10)^\circ$ ,  $\gamma = 98.870(2)^\circ$ , volume = 3194.54(19) Å<sup>3</sup>, are based upon the refinement of the XYZ-centroids of 2194 reflections above  $20 \sigma (I)$  with  $6.653^\circ < 2\theta < 52.81^\circ$ . Data were corrected for absorption effects using the Multi-Scan method implemented in the program (SADABS).<sup>14</sup> The ratio of minimum to maximum apparent transmission was 0.479. The calculated minimum and maximum transmission coefficients (based on crystal size) are 0.1200 and 0.3450. Structure was solved in a triclinic unit cell; Space group: P -1, with Z = 2 for the formula unit,  $C_{64}H_{90}I_2P_2Rh_2Si_4$ . Using the Bruker SHELXT Software Package<sup>15</sup> refinement of the structure was carried out by least squares procedures on weighted  $F^2$  values using the SHELXTL-2018/3<sup>16</sup> included in the APEX3 v2019, 1.0, AXS Bruker program.<sup>17</sup> Hydrogen atoms were localized on difference Fourier maps but then introduced in the refinement as fixed contributors in idealized geometry with an isotropic thermal parameters fixed at 20 % higher than those carbons atoms they were connected. The final anisotropic full-matrix least-squares refinement on  $F^2$  with 684 variables converged at  $R1 = 2.36\%$ , for the observed data and  $wR2 = 5.53\%$  for all data. The goodness-of-fit: GOF was 1.105. The largest peak in the final difference electron density synthesis was  $0.841e^-/\text{\AA}^3$  and the largest hole was  $-0.931e^-/\text{\AA}^3$  with an RMS deviation of  $0.090e^-$

$\text{\AA}^3$ . Based on the final model, the calculated density was  $1.552 \text{ g/cm}^3$  and  $F(000)$ , 1512e<sup>-</sup>. Graphics were performed using softwares: Mercury V.4.2.0: (<https://www.ccdc.cam.ac.uk/>) and POV-Ray v 3.7: (The Persistence of Vision Raytracer, high quality, Free Software tool).

### 10.2.2 Asymmetric unit's view

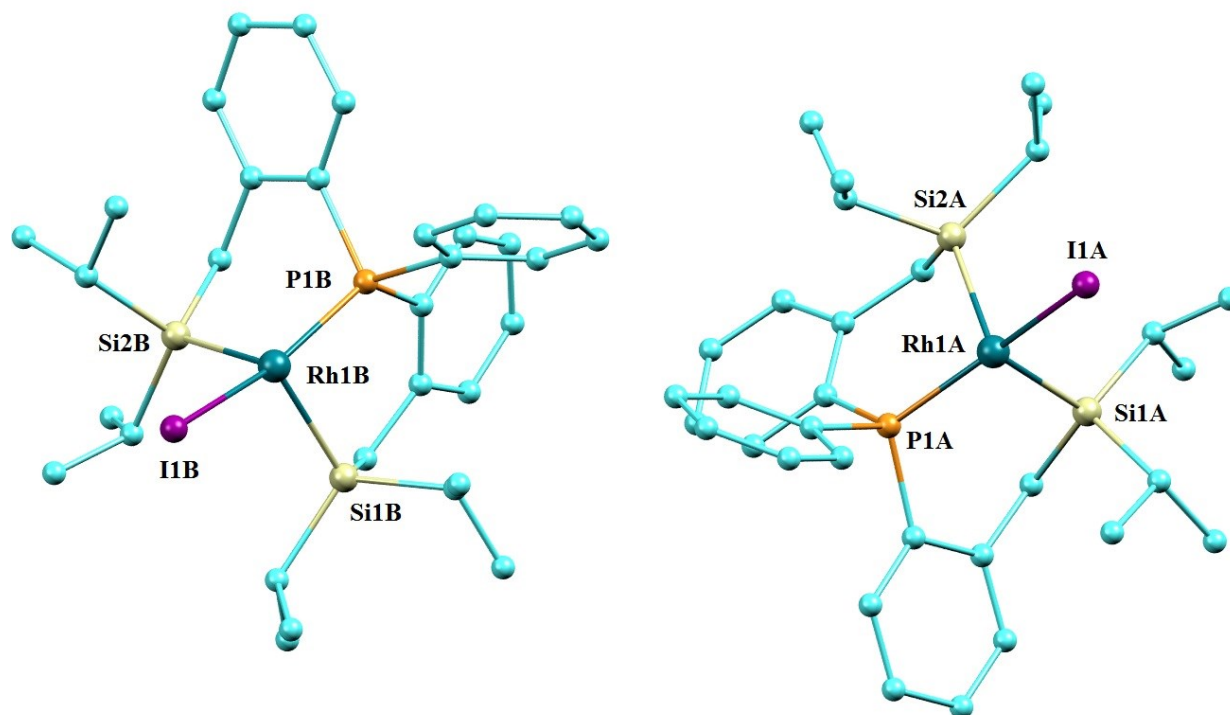

Asymmetric unit view of complex **Rh-3**.

Table S13. Sample and crystal data for A\_VM\_028.

|                            |                                                                        |
|----------------------------|------------------------------------------------------------------------|
| <b>Identification code</b> | A_VM_028                                                               |
| <b>Chemical formula</b>    | $\text{C}_{64}\text{H}_{90}\text{I}_2\text{P}_2\text{Rh}_2\text{Si}_4$ |
| <b>Formula weight</b>      | 1493.27 g/mol                                                          |
| <b>Temperature</b>         | 100(2) K                                                               |
| <b>Wavelength</b>          | 1.54178 Å                                                              |
| <b>Crystal size</b>        | (0.102 x 0.134 x 0.278) mm <sup>3</sup>                                |

|                               |                            |                              |
|-------------------------------|----------------------------|------------------------------|
| <b>Crystal system</b>         | triclinic                  |                              |
| <b>Space group</b>            | P -1                       |                              |
| <b>Unit cell dimensions</b>   | a = 9.5705(3) Å            | $\alpha = 93.3520(10)^\circ$ |
|                               | b = 17.6043(6) Å           | $\beta = 90.1870(10)^\circ$  |
|                               | c = 19.2246(7) Å           | $\gamma = 98.870(2)^\circ$   |
| <b>Volume</b>                 | 3194.54(19) Å <sup>3</sup> |                              |
| <b>Z</b>                      | 2                          |                              |
| <b>Density (calculated)</b>   | 1.552 g/cm <sup>3</sup>    |                              |
| <b>Absorption coefficient</b> | 13.238 mm <sup>-1</sup>    |                              |
| <b>F(000)</b>                 | 1512                       |                              |

**Table S1. Data collection and structure refinement for A\_VM\_028.**

---

|                                            |                                    |
|--------------------------------------------|------------------------------------|
| <b>Theta range for data collection</b>     | 2.30 to 72.49°                     |
| <b>Index ranges</b>                        | -11<=h<=11, -21<=k<=21, -23<=l<=23 |
| <b>Reflections collected</b>               | 68424                              |
| <b>Independent reflections</b>             | 12489 [R (int) = 0.0358]           |
| <b>Coverage of independent reflections</b> | 98.5%                              |
| <b>Absorption correction</b>               | Multi-Scan                         |
| <b>Max. and min. transmission</b>          | 0.3450 and 0.1200                  |
| <b>Structure solution technique</b>        | direct methods                     |

|                                          |                                                                                  |                           |  |
|------------------------------------------|----------------------------------------------------------------------------------|---------------------------|--|
| <b>Structure solution program</b>        | XT, VERSION 2014/5                                                               |                           |  |
| <b>Refinement method</b>                 | Full-matrix least-squares on F <sup>2</sup>                                      |                           |  |
| <b>Refinement program</b>                | SHELXL-2018/3 (Sheldrick, 2018)                                                  |                           |  |
| <b>Function minimized</b>                | $\Sigma w (F_o^2 - F_c^2)^2$                                                     |                           |  |
| <b>Data / restraints / parameters</b>    | 12489 / 0 / 684                                                                  |                           |  |
| <b>Goodness-of-fit on F<sup>2</sup></b>  | 1.105                                                                            |                           |  |
| <b><math>\Delta/\sigma_{\max}</math></b> | 0.003                                                                            |                           |  |
| <b>Final R indices</b>                   | 11961                                                                            |                           |  |
|                                          | data;<br>$I > 2\sigma(I)$                                                        | R1 = 0.0236, wR2 = 0.0543 |  |
|                                          | all data                                                                         | R1 = 0.0252, wR2 = 0.0553 |  |
| <b>Weighting scheme</b>                  | $w = 1/[\sigma^2(F_o^2) + (0.0126P)^2 + 5.3898P]$ where $P = (F_o^2 + 2F_c^2)/3$ |                           |  |
| <b>Extinction coefficient</b>            | 0.0003(0)                                                                        |                           |  |
| <b>Largest diff. peak and hole</b>       | 0.841 and -0.931 eÅ <sup>-3</sup>                                                |                           |  |
| <b>R.M.S. deviation from mean</b>        | 0.090 eÅ <sup>-3</sup>                                                           |                           |  |

**Table S14. Bond lengths (Å) for A\_VM\_028.**

---

|           |           |           |           |
|-----------|-----------|-----------|-----------|
| Rh1A-P1A  | 2.2021(6) | Rh1A-Si2A | 2.2960(7) |
| Rh1A-Si1A | 2.3112(6) | Rh1A-I1A  | 2.6004(2) |
| P1A-C7A   | 1.820(3)  | P1A-C15A  | 1.833(2)  |
| P1A-C8A   | 1.838(2)  | Si1A-C21A | 1.908(3)  |

|           |          |           |          |
|-----------|----------|-----------|----------|
| Si1A-C1A  | 1.910(3) | Si1A-C24A | 1.915(3) |
| Si2A-C14A | 1.896(3) | Si2A-C27A | 1.907(3) |
| Si2A-C30A | 1.919(3) | C1A-C2A   | 1.501(4) |
| C1A-H1A1  | 0.99     | C1A-H1A2  | 0.99     |
| C2A-C3A   | 1.391(4) | C2A-C7A   | 1.410(3) |
| C3A-C4A   | 1.385(4) | C3A-H3A   | 0.95     |
| C4A-C5A   | 1.389(4) | C4A-H4A   | 0.95     |
| C5A-C6A   | 1.386(4) | C5A-H5A   | 0.95     |
| C6A-C7A   | 1.400(4) | C6A-H6A   | 0.95     |
| C8A-C9A   | 1.399(3) | C8A-C13A  | 1.402(4) |
| C9A-C10A  | 1.380(4) | C9A-H9A   | 0.95     |
| C10A-C11A | 1.383(4) | C10A-H10A | 0.95     |
| C11A-C12A | 1.383(4) | C11A-H11A | 0.95     |
| C12A-C13A | 1.409(4) | C12A-H12A | 0.95     |
| C13A-C14A | 1.509(3) | C14A-H14A | 0.99     |
| C14A-H14B | 0.99     | C15A-C20A | 1.389(3) |
| C15A-C16A | 1.400(4) | C16A-C17A | 1.389(4) |
| C16A-H16A | 0.95     | C17A-C18A | 1.386(4) |
| C17A-H17A | 0.95     | C18A-C19A | 1.378(4) |
| C18A-H18A | 0.95     | C19A-C20A | 1.396(4) |
| C19A-H19A | 0.95     | C20A-H20A | 0.95     |
| C21A-C22A | 1.535(4) | C21A-C23A | 1.541(4) |



|           |           |           |           |
|-----------|-----------|-----------|-----------|
| C21A-H21A | 1.0       | C22A-H22A | 0.98      |
| C22A-H22B | 0.98      | C22A-H22C | 0.98      |
| C23A-H23A | 0.98      | C23A-H23B | 0.98      |
| C23A-H23C | 0.98      | C24A-C26A | 1.535(4)  |
| C24A-C25A | 1.538(4)  | C24A-H24A | 1.0       |
| C25A-H25A | 0.98      | C25A-H25B | 0.98      |
| C25A-H25C | 0.98      | C26A-H26A | 0.98      |
| C26A-H26B | 0.98      | C26A-H26C | 0.98      |
| C27A-C28A | 1.533(4)  | C27A-C29A | 1.543(4)  |
| C27A-H27A | 1.0       | C28A-H28A | 0.98      |
| C28A-H28B | 0.98      | C28A-H28C | 0.98      |
| C29A-H29A | 0.98      | C29A-H29B | 0.98      |
| C29A-H29C | 0.98      | C30A-C32A | 1.534(4)  |
| C30A-C31A | 1.534(4)  | C30A-H30A | 1.0       |
| C31A-H31A | 0.98      | C31A-H31B | 0.98      |
| C31A-H31C | 0.98      | C32A-H32A | 0.98      |
| C32A-H32B | 0.98      | C32A-H32C | 0.98      |
| Rh1B-P1B  | 2.2040(6) | Rh1B-Si1B | 2.2975(7) |
| Rh1B-Si2B | 2.3039(6) | Rh1B-I1B  | 2.5924(2) |
| P1B-C8B   | 1.823(2)  | P1B-C15B  | 1.828(2)  |
| P1B-C7B   | 1.833(2)  | Si1B-C1B  | 1.902(2)  |
| Si1B-C21B | 1.906(3)  | Si1B-C24B | 1.916(2)  |

|           |          |           |          |
|-----------|----------|-----------|----------|
| Si2B-C14B | 1.906(2) | Si2B-C30B | 1.911(2) |
| Si2B-C27B | 1.913(2) | C1B-C2B   | 1.501(3) |
| C1B-H1B1  | 0.99     | C1B-H1B2  | 0.99     |
| C2B-C3B   | 1.406(3) | C2B-C7B   | 1.412(3) |
| C3B-C4B   | 1.386(3) | C3B-H3B   | 0.95     |
| C4B-C5B   | 1.387(4) | C4B-H4B   | 0.95     |
| C5B-C6B   | 1.388(3) | C5B-H5B   | 0.95     |
| C6B-C7B   | 1.404(3) | C6B-H6B   | 0.95     |
| C8B-C9B   | 1.401(3) | C8B-C13B  | 1.406(3) |
| C9B-C10B  | 1.390(4) | C9B-H9B   | 0.95     |
| C10B-C11B | 1.384(4) | C10B-H10B | 0.95     |
| C11B-C12B | 1.390(3) | C11B-H11B | 0.95     |
| C12B-C13B | 1.393(3) | C12B-H12B | 0.95     |
| C13B-C14B | 1.502(3) | C14B-H14C | 0.99     |
| C14B-H14D | 0.99     | C15B-C16B | 1.394(3) |
| C15B-C20B | 1.401(3) | C16B-C17B | 1.397(4) |
| C16B-H16B | 0.95     | C17B-C18B | 1.382(4) |
| C17B-H17B | 0.95     | C18B-C19B | 1.381(4) |
| C18B-H18B | 0.95     | C19B-C20B | 1.387(4) |
| C19B-H19B | 0.95     | C20B-H20B | 0.95     |
| C21B-C23B | 1.531(4) | C21B-C22B | 1.541(4) |
| C21B-H21B | 1.0      | C22B-H22D | 0.98     |

|           |          |           |          |
|-----------|----------|-----------|----------|
| C22B-H22E | 0.98     | C22B-H22F | 0.98     |
| C23B-H23D | 0.98     | C23B-H23E | 0.98     |
| C23B-H23F | 0.98     | C24B-C26B | 1.534(4) |
| C24B-C25B | 1.535(4) | C24B-H24B | 1.0      |
| C25B-H25D | 0.98     | C25B-H25E | 0.98     |
| C25B-H25F | 0.98     | C26B-H26D | 0.98     |
| C26B-H26E | 0.98     | C26B-H26F | 0.98     |
| C27B-C29B | 1.535(4) | C27B-C28B | 1.536(3) |
| C27B-H27B | 1.0      | C28B-H28D | 0.98     |
| C28B-H28E | 0.98     | C28B-H28F | 0.98     |
| C29B-H29D | 0.98     | C29B-H29E | 0.98     |
| C29B-H29F | 0.98     | C30B-C32B | 1.531(3) |
| C30B-C31B | 1.541(4) | C30B-H30B | 1.0      |
| C31B-H31D | 0.98     | C31B-H31E | 0.98     |
| C31B-H31F | 0.98     | C32B-H32D | 0.98     |
| C32B-H32E | 0.98     | C32B-H32F | 0.98     |

**Table S15. Bond angles (°) for A\_VM\_028.**

---

|                |          |               |             |
|----------------|----------|---------------|-------------|
| P1A-Rh1A-Si2A  | 86.60(2) | P1A-Rh1A-Si1A | 88.62(2)    |
| Si2A-Rh1A-Si1A | 98.97(2) | P1A-Rh1A-I1A  | 161.285(18) |

|                |             |                |             |
|----------------|-------------|----------------|-------------|
| Si2A-Rh1A-I1A  | 108.071(18) | Si1A-Rh1A-I1A  | 100.115(18) |
| C7A-P1A-C15A   | 104.20(11)  | C7A-P1A-C8A    | 100.88(11)  |
| C15A-P1A-C8A   | 105.00(11)  | C7A-P1A-Rh1A   | 111.40(8)   |
| C15A-P1A-Rh1A  | 107.12(8)   | C8A-P1A-Rh1A   | 126.18(8)   |
| C21A-Si1A-C1A  | 106.53(12)  | C21A-Si1A-C24A | 110.44(12)  |
| C1A-Si1A-C24A  | 107.89(11)  | C21A-Si1A-Rh1A | 104.71(8)   |
| C1A-Si1A-Rh1A  | 112.59(8)   | C24A-Si1A-Rh1A | 114.39(8)   |
| C14A-Si2A-C27A | 104.04(12)  | C14A-Si2A-C30A | 106.96(12)  |
| C27A-Si2A-C30A | 113.53(12)  | C14A-Si2A-Rh1A | 113.33(9)   |
| C27A-Si2A-Rh1A | 108.75(9)   | C30A-Si2A-Rh1A | 110.18(9)   |
| C2A-C1A-Si1A   | 111.56(17)  | C2A-C1A-H1A1   | 109.3       |
| Si1A-C1A-H1A1  | 109.3       | C2A-C1A-H1A2   | 109.3       |
| Si1A-C1A-H1A2  | 109.3       | H1A1-C1A-H1A2  | 108.0       |
| C3A-C2A-C7A    | 117.8(2)    | C3A-C2A-C1A    | 121.3(2)    |
| C7A-C2A-C1A    | 120.8(2)    | C4A-C3A-C2A    | 121.8(3)    |
| C4A-C3A-H3A    | 119.1       | C2A-C3A-H3A    | 119.1       |
| C3A-C4A-C5A    | 120.2(3)    | C3A-C4A-H4A    | 119.9       |
| C5A-C4A-H4A    | 119.9       | C6A-C5A-C4A    | 119.3(3)    |
| C6A-C5A-H5A    | 120.4       | C4A-C5A-H5A    | 120.4       |
| C5A-C6A-C7A    | 120.7(2)    | C5A-C6A-H6A    | 119.7       |
| C7A-C6A-H6A    | 119.7       | C6A-C7A-C2A    | 120.2(2)    |
| C6A-C7A-P1A    | 122.79(19)  | C2A-C7A-P1A    | 116.95(19)  |

|                |            |                |            |
|----------------|------------|----------------|------------|
| C9A-C8A-C13A   | 119.7(2)   | C9A-C8A-P1A    | 115.35(19) |
| C13A-C8A-P1A   | 124.86(18) | C10A-C9A-C8A   | 121.4(2)   |
| C10A-C9A-H9A   | 119.3      | C8A-C9A-H9A    | 119.3      |
| C9A-C10A-C11A  | 119.5(2)   | C9A-C10A-H10A  | 120.3      |
| C11A-C10A-H10A | 120.3      | C12A-C11A-C10A | 119.8(2)   |
| C12A-C11A-H11A | 120.1      | C10A-C11A-H11A | 120.1      |
| C11A-C12A-C13A | 121.9(2)   | C11A-C12A-H12A | 119.1      |
| C13A-C12A-H12A | 119.1      | C8A-C13A-C12A  | 117.5(2)   |
| C8A-C13A-C14A  | 124.5(2)   | C12A-C13A-C14A | 117.8(2)   |
| C13A-C14A-Si2A | 118.67(18) | C13A-C14A-H14A | 107.6      |
| Si2A-C14A-H14A | 107.6      | C13A-C14A-H14B | 107.6      |
| Si2A-C14A-H14B | 107.6      | H14A-C14A-H14B | 107.1      |
| C20A-C15A-C16A | 118.7(2)   | C20A-C15A-P1A  | 124.21(19) |
| C16A-C15A-P1A  | 117.04(19) | C17A-C16A-C15A | 120.9(2)   |
| C17A-C16A-H16A | 119.6      | C15A-C16A-H16A | 119.6      |
| C18A-C17A-C16A | 119.7(3)   | C18A-C17A-H17A | 120.2      |
| C16A-C17A-H17A | 120.2      | C19A-C18A-C17A | 120.0(2)   |
| C19A-C18A-H18A | 120.0      | C17A-C18A-H18A | 120.0      |
| C18A-C19A-C20A | 120.5(2)   | C18A-C19A-H19A | 119.7      |
| C20A-C19A-H19A | 119.7      | C15A-C20A-C19A | 120.2(2)   |
| C15A-C20A-H20A | 119.9      | C19A-C20A-H20A | 119.9      |
| C22A-C21A-C23A | 110.1(2)   | C22A-C21A-Si1A | 114.94(18) |

|                |            |                |            |
|----------------|------------|----------------|------------|
| C23A-C21A-Si1A | 110.62(19) | C22A-C21A-H21A | 106.9      |
| C23A-C21A-H21A | 106.9      | Si1A-C21A-H21A | 106.9      |
| C21A-C22A-H22A | 109.5      | C21A-C22A-H22B | 109.5      |
| H22A-C22A-H22B | 109.5      | C21A-C22A-H22C | 109.5      |
| H22A-C22A-H22C | 109.5      | H22B-C22A-H22C | 109.5      |
| C21A-C23A-H23A | 109.5      | C21A-C23A-H23B | 109.5      |
| H23A-C23A-H23B | 109.5      | C21A-C23A-H23C | 109.5      |
| H23A-C23A-H23C | 109.5      | H23B-C23A-H23C | 109.5      |
| C26A-C24A-C25A | 110.9(2)   | C26A-C24A-Si1A | 112.64(19) |
| C25A-C24A-Si1A | 113.03(18) | C26A-C24A-H24A | 106.6      |
| C25A-C24A-H24A | 106.6      | Si1A-C24A-H24A | 106.6      |
| C24A-C25A-H25A | 109.5      | C24A-C25A-H25B | 109.5      |
| H25A-C25A-H25B | 109.5      | C24A-C25A-H25C | 109.5      |
| H25A-C25A-H25C | 109.5      | H25B-C25A-H25C | 109.5      |
| C24A-C26A-H26A | 109.5      | C24A-C26A-H26B | 109.5      |
| H26A-C26A-H26B | 109.5      | C24A-C26A-H26C | 109.5      |
| H26A-C26A-H26C | 109.5      | H26B-C26A-H26C | 109.5      |
| C28A-C27A-C29A | 110.9(2)   | C28A-C27A-Si2A | 115.49(19) |
| C29A-C27A-Si2A | 112.1(2)   | C28A-C27A-H27A | 105.8      |
| C29A-C27A-H27A | 105.8      | Si2A-C27A-H27A | 105.8      |
| C27A-C28A-H28A | 109.5      | C27A-C28A-H28B | 109.5      |
| H28A-C28A-H28B | 109.5      | C27A-C28A-H28C | 109.5      |

|                |             |                |             |
|----------------|-------------|----------------|-------------|
| H28A-C28A-H28C | 109.5       | H28B-C28A-H28C | 109.5       |
| C27A-C29A-H29A | 109.5       | C27A-C29A-H29B | 109.5       |
| H29A-C29A-H29B | 109.5       | C27A-C29A-H29C | 109.5       |
| H29A-C29A-H29C | 109.5       | H29B-C29A-H29C | 109.5       |
| C32A-C30A-C31A | 110.6(2)    | C32A-C30A-Si2A | 113.61(19)  |
| C31A-C30A-Si2A | 113.20(19)  | C32A-C30A-H30A | 106.3       |
| C31A-C30A-H30A | 106.3       | Si2A-C30A-H30A | 106.3       |
| C30A-C31A-H31A | 109.5       | C30A-C31A-H31B | 109.5       |
| H31A-C31A-H31B | 109.5       | C30A-C31A-H31C | 109.5       |
| H31A-C31A-H31C | 109.5       | H31B-C31A-H31C | 109.5       |
| C30A-C32A-H32A | 109.5       | C30A-C32A-H32B | 109.5       |
| H32A-C32A-H32B | 109.5       | C30A-C32A-H32C | 109.5       |
| H32A-C32A-H32C | 109.5       | H32B-C32A-H32C | 109.5       |
| P1B-Rh1B-Si1B  | 88.29(2)    | P1B-Rh1B-Si2B  | 89.44(2)    |
| Si1B-Rh1B-Si2B | 97.92(2)    | P1B-Rh1B-I1B   | 157.885(17) |
| Si1B-Rh1B-I1B  | 104.168(17) | Si2B-Rh1B-I1B  | 106.474(16) |
| C8B-P1B-C15B   | 104.91(11)  | C8B-P1B-C7B    | 102.88(10)  |
| C15B-P1B-C7B   | 104.59(11)  | C8B-P1B-Rh1B   | 114.60(7)   |
| C15B-P1B-Rh1B  | 100.95(8)   | C7B-P1B-Rh1B   | 126.64(8)   |
| C1B-Si1B-C21B  | 103.41(11)  | C1B-Si1B-C24B  | 107.90(11)  |
| C21B-Si1B-C24B | 114.37(12)  | C1B-Si1B-Rh1B  | 111.57(8)   |
| C21B-Si1B-Rh1B | 106.51(9)   | C24B-Si1B-Rh1B | 112.74(8)   |

|                |            |                |            |
|----------------|------------|----------------|------------|
| C14B-Si2B-C30B | 106.39(11) | C14B-Si2B-C27B | 107.76(11) |
| C30B-Si2B-C27B | 110.50(11) | C14B-Si2B-Rh1B | 112.48(7)  |
| C30B-Si2B-Rh1B | 116.06(8)  | C27B-Si2B-Rh1B | 103.43(8)  |
| C2B-C1B-Si1B   | 115.56(16) | C2B-C1B-H1B1   | 108.4      |
| Si1B-C1B-H1B1  | 108.4      | C2B-C1B-H1B2   | 108.4      |
| Si1B-C1B-H1B2  | 108.4      | H1B1-C1B-H1B2  | 107.5      |
| C3B-C2B-C7B    | 117.6(2)   | C3B-C2B-C1B    | 118.8(2)   |
| C7B-C2B-C1B    | 123.6(2)   | C4B-C3B-C2B    | 122.0(2)   |
| C4B-C3B-H3B    | 119.0      | C2B-C3B-H3B    | 119.0      |
| C3B-C4B-C5B    | 120.0(2)   | C3B-C4B-H4B    | 120.0      |
| C5B-C4B-H4B    | 120.0      | C4B-C5B-C6B    | 119.4(2)   |
| C4B-C5B-H5B    | 120.3      | C6B-C5B-H5B    | 120.3      |
| C5B-C6B-C7B    | 121.2(2)   | C5B-C6B-H6B    | 119.4      |
| C7B-C6B-H6B    | 119.4      | C6B-C7B-C2B    | 119.7(2)   |
| C6B-C7B-P1B    | 116.53(18) | C2B-C7B-P1B    | 123.66(17) |
| C9B-C8B-C13B   | 119.6(2)   | C9B-C8B-P1B    | 122.71(18) |
| C13B-C8B-P1B   | 117.60(17) | C10B-C9B-C8B   | 120.7(2)   |
| C10B-C9B-H9B   | 119.6      | C8B-C9B-H9B    | 119.6      |
| C11B-C10B-C9B  | 119.7(2)   | C11B-C10B-H10B | 120.1      |
| C9B-C10B-H10B  | 120.1      | C10B-C11B-C12B | 119.8(2)   |
| C10B-C11B-H11B | 120.1      | C12B-C11B-H11B | 120.1      |
| C11B-C12B-C13B | 121.6(2)   | C11B-C12B-H12B | 119.2      |



|                |            |                |            |
|----------------|------------|----------------|------------|
| C13B-C12B-H12B | 119.2      | C12B-C13B-C8B  | 118.6(2)   |
| C12B-C13B-C14B | 120.3(2)   | C8B-C13B-C14B  | 121.1(2)   |
| C13B-C14B-Si2B | 112.92(15) | C13B-C14B-H14C | 109.0      |
| Si2B-C14B-H14C | 109.0      | C13B-C14B-H14D | 109.0      |
| Si2B-C14B-H14D | 109.0      | H14C-C14B-H14D | 107.8      |
| C16B-C15B-C20B | 119.0(2)   | C16B-C15B-P1B  | 124.52(19) |
| C20B-C15B-P1B  | 116.35(18) | C15B-C16B-C17B | 120.1(2)   |
| C15B-C16B-H16B | 120.0      | C17B-C16B-H16B | 120.0      |
| C18B-C17B-C16B | 120.1(2)   | C18B-C17B-H17B | 120.0      |
| C16B-C17B-H17B | 120.0      | C19B-C18B-C17B | 120.4(2)   |
| C19B-C18B-H18B | 119.8      | C17B-C18B-H18B | 119.8      |
| C18B-C19B-C20B | 119.9(2)   | C18B-C19B-H19B | 120.0      |
| C20B-C19B-H19B | 120.0      | C19B-C20B-C15B | 120.5(2)   |
| C19B-C20B-H20B | 119.7      | C15B-C20B-H20B | 119.7      |
| C23B-C21B-C22B | 112.2(2)   | C23B-C21B-Si1B | 117.00(19) |
| C22B-C21B-Si1B | 110.08(19) | C23B-C21B-H21B | 105.5      |
| C22B-C21B-H21B | 105.5      | Si1B-C21B-H21B | 105.5      |
| C21B-C22B-H22D | 109.5      | C21B-C22B-H22E | 109.5      |
| H22D-C22B-H22E | 109.5      | C21B-C22B-H22F | 109.5      |
| H22D-C22B-H22F | 109.5      | H22E-C22B-H22F | 109.5      |
| C21B-C23B-H23D | 109.5      | C21B-C23B-H23E | 109.5      |
| H23D-C23B-H23E | 109.5      | C21B-C23B-H23F | 109.5      |

|                |            |                |            |
|----------------|------------|----------------|------------|
| H23D-C23B-H23F | 109.5      | H23E-C23B-H23F | 109.5      |
| C26B-C24B-C25B | 109.9(2)   | C26B-C24B-Si1B | 113.60(18) |
| C25B-C24B-Si1B | 113.85(17) | C26B-C24B-H24B | 106.3      |
| C25B-C24B-H24B | 106.3      | Si1B-C24B-H24B | 106.3      |
| C24B-C25B-H25D | 109.5      | C24B-C25B-H25E | 109.5      |
| H25D-C25B-H25E | 109.5      | C24B-C25B-H25F | 109.5      |
| H25D-C25B-H25F | 109.5      | H25E-C25B-H25F | 109.5      |
| C24B-C26B-H26D | 109.5      | C24B-C26B-H26E | 109.5      |
| H26D-C26B-H26E | 109.5      | C24B-C26B-H26F | 109.5      |
| H26D-C26B-H26F | 109.5      | H26E-C26B-H26F | 109.5      |
| C29B-C27B-C28B | 109.6(2)   | C29B-C27B-Si2B | 111.56(17) |
| C28B-C27B-Si2B | 114.75(17) | C29B-C27B-H27B | 106.8      |
| C28B-C27B-H27B | 106.8      | Si2B-C27B-H27B | 106.8      |
| C27B-C28B-H28D | 109.5      | C27B-C28B-H28E | 109.5      |
| H28D-C28B-H28E | 109.5      | C27B-C28B-H28F | 109.5      |
| H28D-C28B-H28F | 109.5      | H28E-C28B-H28F | 109.5      |
| C27B-C29B-H29D | 109.5      | C27B-C29B-H29E | 109.5      |
| H29D-C29B-H29E | 109.5      | C27B-C29B-H29F | 109.5      |
| H29D-C29B-H29F | 109.5      | H29E-C29B-H29F | 109.5      |
| C32B-C30B-C31B | 110.4(2)   | C32B-C30B-Si2B | 111.89(17) |
| C31B-C30B-Si2B | 114.03(17) | C32B-C30B-H30B | 106.7      |
| C31B-C30B-H30B | 106.7      | Si2B-C30B-H30B | 106.7      |

|                |       |                |       |
|----------------|-------|----------------|-------|
| C30B-C31B-H31D | 109.5 | C30B-C31B-H31E | 109.5 |
| H31D-C31B-H31E | 109.5 | C30B-C31B-H31F | 109.5 |
| H31D-C31B-H31F | 109.5 | H31E-C31B-H31F | 109.5 |
| C30B-C32B-H32D | 109.5 | C30B-C32B-H32E | 109.5 |
| H32D-C32B-H32E | 109.5 | C30B-C32B-H32F | 109.5 |
| H32D-C32B-H32F | 109.5 | H32E-C32B-H32F | 109.5 |

## 10.3 Crystal data of Rh-4

### 10.3.1 Crystal Structure Report for CU\_B\_VM\_020\_Final

A yellow prism single crystal of  $C_{39}H_{51}F_3O_3PRhSSi_2$ , approximate dimensions (0.099 x 0.102 x 0.334) mm<sup>3</sup>, was selected for the X-ray crystallographic analysis and mounted on a cryoloop using an oil cryoprotectant. The X-ray intensity data was measured at low temperature (T = 100K), using a three circles goniometer Kappa geometry with a fixed Kappa angle at = 54.74 deg Bruker AXS D8 Venture, equipped with a Photon 100 CMOS active pixel sensor detector. A monochromatized Cu X-ray radiation ( $\lambda = 1.54178 \text{ \AA}$ ) was selected for the measurement.

All frames were integrated with the aid of the Bruker SAINT software<sup>13</sup> using a narrow-frame algorithm. The integration of the data using a monoclinic unit cell yielded a total of 53650 reflections to a maximum  $\theta$  angle of 72.76° (0.81 Å resolution), of which 7861 were independent (average redundancy 6.825, completeness = 99.5%,  $R_{\text{int}} = 5.56\%$ ,  $R_{\text{sig}} = 3.61\%$ ) and 7579 (96.41%) were greater than  $2\sigma (F^2)$ .

The final cell constants of  $a = 11.7311(8) \text{ \AA}$ ,  $b = 21.7488(15) \text{ \AA}$ ,  $c = 15.5316(11) \text{ \AA}$ ,  $\beta = 93.067(2)^\circ$ , volume = 3957.0(5) Å<sup>3</sup>, are based upon the refinement of the 2178 XYZ-centroids of reflections above  $20 \sigma (I)$  with  $3.150^\circ < \theta < 72.160^\circ$ . Data were corrected for absorption effects using the Multi-Scan method (SADABS)<sup>14</sup> The calculated minimum and maximum transmission coefficients (based on crystalsize) are 0.2680 and 0.6200.

Structure was solved in a monoclinic unit cell; Space group: P 1 21/n 1, with Z = 4 for the formula unit,  $C_{39}H_{51}F_3O_3PRhSSi_2$ . Using the Bruker SHELXT Software Package,<sup>15</sup> refinement of the structure was carried out by least squares procedures on weighted  $F^2$  values using the SHELXTL-2018/3<sup>16</sup> included in the APEX3 v2019, 1.0, AXS Bruker program.<sup>17</sup> Hydrogen atoms were localized on difference Fourier maps but then introduced in the refinement as fixed contributors in idealized geometry with an isotropic thermal parameters fixed at 20 % higher than those carbons atoms they were connected. A molecule of solvent of crystallization: Benzene was also found in the unit cell.

The final anisotropic full-matrix least-squares refinement on  $F^2$  with 460 variables converged at  $R1 = 3.60\%$ , for the observed data and  $wR2 = 9.68\%$  for all data. The goodness-of-fit: GOF was 1.047. The largest peak in the final difference electron density synthesis was 1.453 e<sup>-</sup>/Å<sup>3</sup> and

the largest hole was  $-1.230 \text{ e}^-/\text{\AA}^3$  with an RMS deviation of  $0.113 \text{ e}^-/\text{\AA}^3$ . On the basis of the final model, the calculated density was  $1.422 \text{ g/cm}^3$  and  $F(000)$ ,  $1760 \text{ e}^-$ . Graphics were performed using softwares: Mercury V.4.2.0: (<https://www.ccdc.cam.ac.uk/>) and POV-Ray v 3.7: (The Persistence of Vision Raytracer, high quality, Free Software tool).

### 10.3.2 Asymmetric unit's view

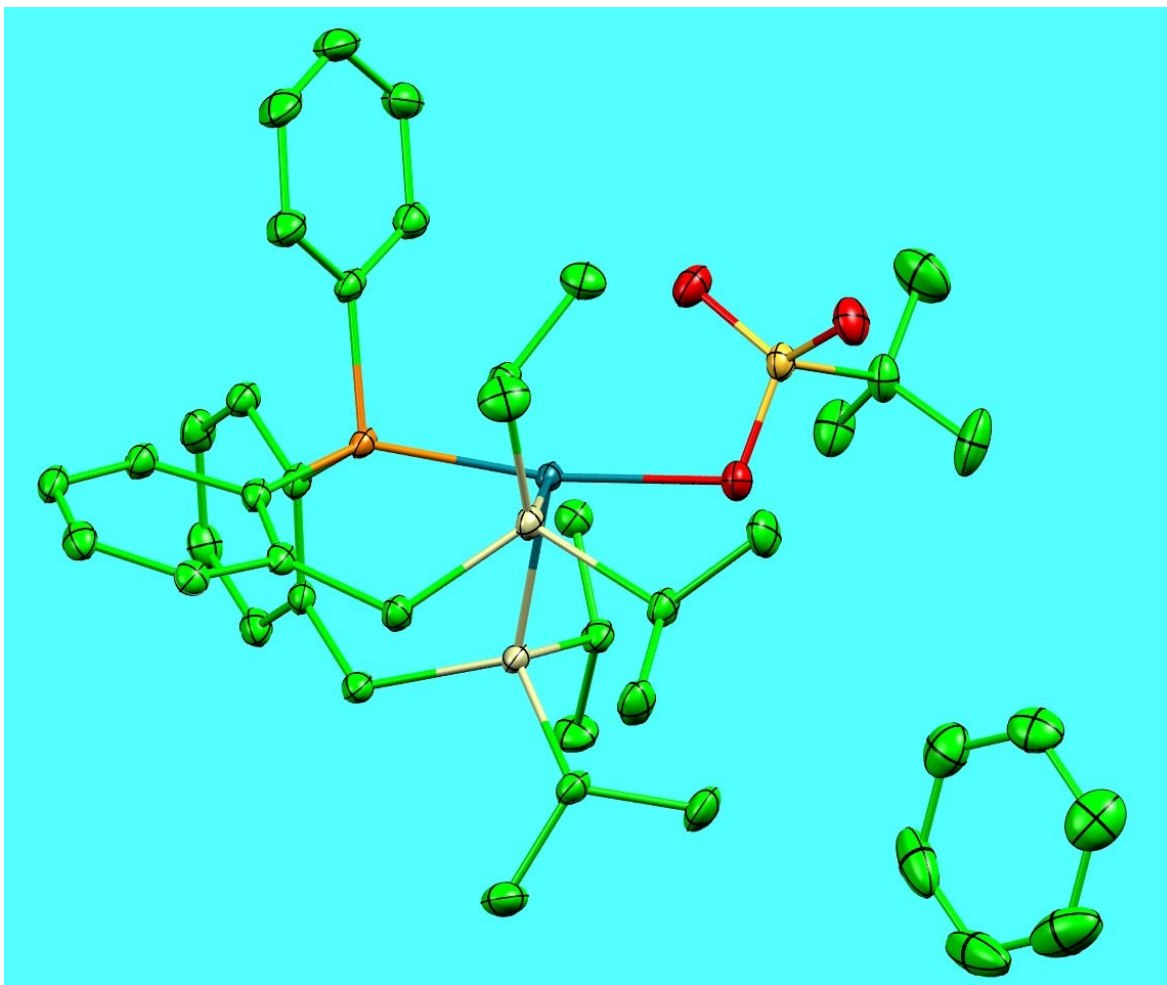

Asymmetric unit view of complex **Rh-4**

Table S16. Sample and crystal data for CU\_B\_VM\_020\_Final.

---

|                     |                                                                                   |
|---------------------|-----------------------------------------------------------------------------------|
| Identification code | CU_B_VM_020_Final                                                                 |
| Chemical formula    | C <sub>39</sub> H <sub>51</sub> F <sub>3</sub> O <sub>3</sub> PRhSSi <sub>2</sub> |
| Formula weight      | 846.91 g/mol                                                                      |
| Temperature         | 100(2) K                                                                          |

|                               |                                                                                                    |
|-------------------------------|----------------------------------------------------------------------------------------------------|
| <b>Wavelength</b>             | 1.54178 Å                                                                                          |
| <b>Crystal size</b>           | (0.099 x 0.102 x 0.334) mm <sup>3</sup>                                                            |
| <b>Crystal system</b>         | monoclinic                                                                                         |
| <b>Space group</b>            | P 1 21/n 1                                                                                         |
| <b>Unit cell dimensions</b>   | a = 11.7311(8) Å    α = 90°<br>b = 21.7488(15) Å    β = 93.067(2)°<br>c = 15.5316(11) Å    γ = 90° |
| <b>Volume</b>                 | 3957.0(5) Å <sup>3</sup>                                                                           |
| <b>Z</b>                      | 4                                                                                                  |
| <b>Density (calculated)</b>   | 1.422 g/cm <sup>3</sup>                                                                            |
| <b>Absorption coefficient</b> | 5.361 mm <sup>-1</sup>                                                                             |
| <b>F (000)</b>                | 1760                                                                                               |

Table S17. Data collection and structure refinement for CU\_B\_VM\_020\_Final.

---

|                                        |                                                                               |
|----------------------------------------|-------------------------------------------------------------------------------|
| <b>Theta range for data collection</b> | 3.50 to 72.76°                                                                |
| <b>Index ranges</b>                    | -14<=h<=14, -26<=k<=26, -19<=l<=19                                            |
| <b>Reflections collected</b>           | 53650                                                                         |
| <b>Independent reflections</b>         | 7861 [R(int) = 0.0556]                                                        |
| <b>Max. and min. transmission</b>      | 0.6200 and 0.2680                                                             |
| <b>Refinement method</b>               | Full-matrix least-squares on F <sup>2</sup>                                   |
| <b>Refinement program</b>              | SHELXL-2018/3 (Sheldrick, 2018)                                               |
| <b>Function minimized</b>              | Σ w (F <sub>o</sub> <sup>2</sup> - F <sub>c</sub> <sup>2</sup> ) <sup>2</sup> |
| <b>Data / restraints / parameters</b>  | 7861 / 0 / 460                                                                |

|                                          |                                                                                     |                           |
|------------------------------------------|-------------------------------------------------------------------------------------|---------------------------|
| <b>Goodness-of-fit on F<sup>2</sup></b>  | 1.047                                                                               |                           |
| <b><math>\Delta/\sigma_{\max}</math></b> | 0.001                                                                               |                           |
| <b>Final R indices</b>                   | 7579 data;<br>$I > 2\sigma(I)$                                                      | R1 = 0.0360, wR2 = 0.0955 |
|                                          | all data                                                                            | R1 = 0.0369, wR2 = 0.0968 |
| <b>Weighting scheme</b>                  | $w = 1/[\sigma^2(F_o^2) + (0.0651P)^2 + 2.8680P]$<br>where $P = (F_o^2 + 2F_c^2)/3$ |                           |
| <b>Extinction coefficient</b>            | 0.0002(0)                                                                           |                           |
| <b>Largest diff. peak and hole</b>       | 1.453 and -1.230 eÅ <sup>-3</sup>                                                   |                           |
| <b>R.M.S. deviation from mean</b>        | 0.113 eÅ <sup>-3</sup>                                                              |                           |

**Table S18. Bond lengths (Å) for CU\_B\_VM\_020\_Final.**

---

|         |            |         |           |
|---------|------------|---------|-----------|
| Rh1-O1  | 2.1736(14) | Rh1-P1  | 2.1948(5) |
| Rh1-Si1 | 2.2955(6)  | Rh1-Si2 | 2.3036(5) |
| P1-C14  | 1.827(2)   | P1-C7   | 1.828(2)  |
| P1-C8   | 1.833(2)   | Si1-C1  | 1.890(2)  |
| Si1-C21 | 1.907(2)   | Si1-C24 | 1.918(2)  |
| Si2-C20 | 1.895(2)   | Si2-C27 | 1.900(2)  |
| Si2-C30 | 1.906(2)   | C1-C2   | 1.509(3)  |
| C1-H1A  | 0.99       | C1-H1B  | 0.99      |
| C2-C3   | 1.399(3)   | C2-C7   | 1.406(3)  |
| C3-C4   | 1.387(3)   | C3-H3   | 0.95      |
| C4-C5   | 1.388(3)   | C4-H4   | 0.95      |
| C5-C6   | 1.385(3)   | C5-H5   | 0.95      |
| C6-C7   | 1.408(3)   | C6-H6   | 0.95      |
| C8-C9   | 1.393(3)   | C8-C13  | 1.401(3)  |



|          |          |          |          |
|----------|----------|----------|----------|
| C9-C10   | 1.394(3) | C9-H9    | 0.95     |
| C10-C11  | 1.387(4) | C10-H10  | 0.95     |
| C11-C12  | 1.386(4) | C11-H11  | 0.95     |
| C12-C13  | 1.389(3) | C12-H12  | 0.95     |
| C13-H13  | 0.95     | C14-C15  | 1.399(3) |
| C14-C19  | 1.405(3) | C15-C16  | 1.390(3) |
| C15-H15  | 0.95     | C16-C17  | 1.386(3) |
| C16-H16  | 0.95     | C17-C18  | 1.391(3) |
| C17-H17  | 0.95     | C18-C19  | 1.397(3) |
| C18-H18  | 0.95     | C19-C20  | 1.499(3) |
| C20-H20A | 0.99     | C20-H20B | 0.99     |
| C21-C23  | 1.531(3) | C21-C22  | 1.542(3) |
| C21-H21  | 1.0      | C22-H22A | 0.98     |
| C22-H22B | 0.98     | C22-H22C | 0.98     |
| C23-H23A | 0.98     | C23-H23B | 0.98     |
| C23-H23C | 0.98     | C24-C26  | 1.532(3) |
| C24-C25  | 1.542(3) | C24-H24  | 1.0      |
| C25-H25A | 0.98     | C25-H25B | 0.98     |
| C25-H25C | 0.98     | C26-H26A | 0.98     |
| C26-H26B | 0.98     | C26-H26C | 0.98     |
| C27-C29  | 1.534(3) | C27-C28  | 1.540(3) |
| C27-H27  | 1.0      | C28-H28A | 0.98     |
| C28-H28B | 0.98     | C28-H28C | 0.98     |
| C29-H29A | 0.98     | C29-H29B | 0.98     |
| C29-H29C | 0.98     | C30-C32  | 1.536(3) |
| C30-C31  | 1.537(3) | C30-H30  | 1.0      |
| C31-H31A | 0.98     | C31-H31B | 0.98     |

|          |            |          |            |
|----------|------------|----------|------------|
| C31-H31C | 0.98       | C32-H32A | 0.98       |
| C32-H32B | 0.98       | C32-H32C | 0.98       |
| C33-F2   | 1.325(3)   | C33-F3   | 1.327(3)   |
| C33-F1   | 1.333(3)   | C33-S1   | 1.832(2)   |
| S1-O3    | 1.4299(16) | S1-O2    | 1.4413(16) |
| S1-O1    | 1.4779(16) | C1S-C6S  | 1.368(4)   |
| C1S-C2S  | 1.371(4)   | C1S-H1S  | 0.95       |
| C2S-C3S  | 1.390(5)   | C2S-H2S  | 0.95       |
| C3S-C4S  | 1.391(6)   | C3S-H3S  | 0.95       |
| C4S-C5S  | 1.368(6)   | C4S-H4S  | 0.95       |
| C5S-C6S  | 1.379(5)   | C5S-H5S  | 0.95       |
| C6S-H6S  | 0.95       |          |            |

**Table S19. Bond angles (°) for CU\_B\_VM\_020\_Final.**

---

|             |            |             |           |
|-------------|------------|-------------|-----------|
| O1-Rh1-P1   | 170.27(4)  | O1-Rh1-Si1  | 96.28(4)  |
| P1-Rh1-Si1  | 88.926(19) | O1-Rh1-Si2  | 98.17(4)  |
| P1-Rh1-Si2  | 89.220(19) | Si1-Rh1-Si2 | 97.82(2)  |
| C14-P1-C7   | 102.23(9)  | C14-P1-C8   | 104.37(9) |
| C7-P1-C8    | 104.21(9)  | C14-P1-Rh1  | 113.62(7) |
| C7-P1-Rh1   | 125.53(7)  | C8-P1-Rh1   | 104.82(7) |
| C1-Si1-C21  | 105.26(9)  | C1-Si1-C24  | 108.49(9) |
| C21-Si1-C24 | 114.98(10) | C1-Si1-Rh1  | 112.60(7) |
| C21-Si1-Rh1 | 106.58(7)  | C24-Si1-Rh1 | 109.00(7) |
| C20-Si2-C27 | 106.94(9)  | C20-Si2-C30 | 110.05(9) |

|             |            |             |            |
|-------------|------------|-------------|------------|
| C27-Si2-C30 | 111.67(9)  | C20-Si2-Rh1 | 113.12(7)  |
| C27-Si2-Rh1 | 118.03(7)  | C30-Si2-Rh1 | 96.69(6)   |
| C2-C1-Si1   | 117.05(14) | C2-C1-H1A   | 108.0      |
| Si1-C1-H1A  | 108.0      | C2-C1-H1B   | 108.0      |
| Si1-C1-H1B  | 108.0      | H1A-C1-H1B  | 107.3      |
| C3-C2-C7    | 117.77(18) | C3-C2-C1    | 118.07(18) |
| C7-C2-C1    | 124.06(18) | C4-C3-C2    | 122.0(2)   |
| C4-C3-H3    | 119.0      | C2-C3-H3    | 119.0      |
| C3-C4-C5    | 120.2(2)   | C3-C4-H4    | 119.9      |
| C5-C4-H4    | 119.9      | C6-C5-C4    | 118.7(2)   |
| C6-C5-H5    | 120.7      | C4-C5-H5    | 120.7      |
| C5-C6-C7    | 121.7(2)   | C5-C6-H6    | 119.1      |
| C7-C6-H6    | 119.1      | C2-C7-C6    | 119.41(19) |
| C2-C7-P1    | 125.11(15) | C6-C7-P1    | 115.36(15) |
| C9-C8-C13   | 119.1(2)   | C9-C8-P1    | 123.24(17) |
| C13-C8-P1   | 117.59(16) | C8-C9-C10   | 120.3(2)   |
| C8-C9-H9    | 119.9      | C10-C9-H9   | 119.9      |
| C11-C10-C9  | 120.0(2)   | C11-C10-H10 | 120.0      |
| C9-C10-H10  | 120.0      | C12-C11-C10 | 120.1(2)   |
| C12-C11-H11 | 119.9      | C10-C11-H11 | 119.9      |
| C11-C12-C13 | 120.1(2)   | C11-C12-H12 | 119.9      |
| C13-C12-H12 | 119.9      | C12-C13-C8  | 120.2(2)   |
| C12-C13-H13 | 119.9      | C8-C13-H13  | 119.9      |
| C15-C14-C19 | 119.97(19) | C15-C14-P1  | 122.40(16) |
| C19-C14-P1  | 117.63(15) | C16-C15-C14 | 120.5(2)   |
| C16-C15-H15 | 119.7      | C14-C15-H15 | 119.7      |
| C17-C16-C15 | 119.9(2)   | C17-C16-H16 | 120.0      |

|               |            |               |            |
|---------------|------------|---------------|------------|
| C15-C16-H16   | 120.0      | C16-C17-C18   | 119.7(2)   |
| C16-C17-H17   | 120.2      | C18-C17-H17   | 120.2      |
| C17-C18-C19   | 121.5(2)   | C17-C18-H18   | 119.3      |
| C19-C18-H18   | 119.3      | C18-C19-C14   | 118.37(19) |
| C18-C19-C20   | 120.23(18) | C14-C19-C20   | 121.37(18) |
| C19-C20-Si2   | 113.75(14) | C19-C20-H20A  | 108.8      |
| Si2-C20-H20A  | 108.8      | C19-C20-H20B  | 108.8      |
| Si2-C20-H20B  | 108.8      | H20A-C20-H20B | 107.7      |
| C23-C21-C22   | 111.14(19) | C23-C21-Si1   | 115.89(16) |
| C22-C21-Si1   | 111.56(16) | C23-C21-H21   | 105.8      |
| C22-C21-H21   | 105.8      | Si1-C21-H21   | 105.8      |
| C21-C22-H22A  | 109.5      | C21-C22-H22B  | 109.5      |
| H22A-C22-H22B | 109.5      | C21-C22-H22C  | 109.5      |
| H22A-C22-H22C | 109.5      | H22B-C22-H22C | 109.5      |
| C21-C23-H23A  | 109.5      | C21-C23-H23B  | 109.5      |
| H23A-C23-H23B | 109.5      | C21-C23-H23C  | 109.5      |
| H23A-C23-H23C | 109.5      | H23B-C23-H23C | 109.5      |
| C26-C24-C25   | 109.26(18) | C26-C24-Si1   | 115.00(15) |
| C25-C24-Si1   | 113.63(15) | C26-C24-H24   | 106.1      |
| C25-C24-H24   | 106.1      | Si1-C24-H24   | 106.1      |
| C24-C25-H25A  | 109.5      | C24-C25-H25B  | 109.5      |
| H25A-C25-H25B | 109.5      | C24-C25-H25C  | 109.5      |
| H25A-C25-H25C | 109.5      | H25B-C25-H25C | 109.5      |
| C24-C26-H26A  | 109.5      | C24-C26-H26B  | 109.5      |
| H26A-C26-H26B | 109.5      | C24-C26-H26C  | 109.5      |
| H26A-C26-H26C | 109.5      | H26B-C26-H26C | 109.5      |
| C29-C27-C28   | 109.72(19) | C29-C27-Si2   | 112.55(15) |

|               |            |               |            |
|---------------|------------|---------------|------------|
| C28-C27-Si2   | 113.32(15) | C29-C27-H27   | 107.0      |
| C28-C27-H27   | 107.0      | Si2-C27-H27   | 107.0      |
| C27-C28-H28A  | 109.5      | C27-C28-H28B  | 109.5      |
| H28A-C28-H28B | 109.5      | C27-C28-H28C  | 109.5      |
| H28A-C28-H28C | 109.5      | H28B-C28-H28C | 109.5      |
| C27-C29-H29A  | 109.5      | C27-C29-H29B  | 109.5      |
| H29A-C29-H29B | 109.5      | C27-C29-H29C  | 109.5      |
| H29A-C29-H29C | 109.5      | H29B-C29-H29C | 109.5      |
| C32-C30-C31   | 109.89(18) | C32-C30-Si2   | 113.31(14) |
| C31-C30-Si2   | 112.52(15) | C32-C30-H30   | 106.9      |
| C31-C30-H30   | 106.9      | Si2-C30-H30   | 106.9      |
| C30-C31-H31A  | 109.5      | C30-C31-H31B  | 109.5      |
| H31A-C31-H31B | 109.5      | C30-C31-H31C  | 109.5      |
| H31A-C31-H31C | 109.5      | H31B-C31-H31C | 109.5      |
| C30-C32-H32A  | 109.5      | C30-C32-H32B  | 109.5      |
| H32A-C32-H32B | 109.5      | C30-C32-H32C  | 109.5      |
| H32A-C32-H32C | 109.5      | H32B-C32-H32C | 109.5      |
| F2-C33-F3     | 108.47(19) | F2-C33-F1     | 107.82(19) |
| F3-C33-F1     | 107.82(19) | F2-C33-S1     | 110.18(17) |
| F3-C33-S1     | 110.81(15) | F1-C33-S1     | 111.63(15) |
| O3-S1-O2      | 117.75(10) | O3-S1-O1      | 114.57(9)  |
| O2-S1-O1      | 111.23(9)  | O3-S1-C33     | 103.55(10) |
| O2-S1-C33     | 105.19(10) | O1-S1-C33     | 102.49(10) |
| S1-O1-Rh1     | 109.16(8)  | C6S-C1S-C2S   | 120.4(3)   |
| C6S-C1S-H1S   | 119.8      | C2S-C1S-H1S   | 119.8      |
| C1S-C2S-C3S   | 120.2(3)   | C1S-C2S-H2S   | 119.9      |
| C3S-C2S-H2S   | 119.9      | C2S-C3S-C4S   | 118.8(3)   |

|             |          |             |          |
|-------------|----------|-------------|----------|
| C2S-C3S-H3S | 120.6    | C4S-C3S-H3S | 120.6    |
| C5S-C4S-C3S | 120.4(3) | C5S-C4S-H4S | 119.8    |
| C3S-C4S-H4S | 119.8    | C4S-C5S-C6S | 120.1(3) |
| C4S-C5S-H5S | 119.9    | C6S-C5S-H5S | 119.9    |
| C1S-C6S-C5S | 120.1(3) | C1S-C6S-H6S | 120.0    |
| C5S-C6S-H6S | 120.0    |             |          |

## 10.4 Crystal data of **Rh-5**

### 10.4.1 Crystal Structure Report for A\_VM\_013\_100K

A pale yellow prism single crystal of  $C_{33}H_{45}Cl_7GaPRhSi_2$ , approximate dimensions (0.221 x 0.231 x 0.360) mm<sup>3</sup>, was selected for the X-ray crystallographic analysis and mounted on a cryoloop using an oil cryoprotectant. The X-ray intensity data was measured at low temperature (T = 100K), using a three circles goniometer Kappa geometry with a fixed Kappa angle at = 54.74 deg Bruker AXS D8 Venture, equipped with a Photon 100 CMOS active pixel sensor detector. A monochromatized Molybdenum X-ray radiation ( $\lambda = 0.71073 \text{ \AA}$ ) was selected for the measurement. Frames were integrated with the Bruker SAINT software<sup>13</sup> using a narrow-frame algorithm. The integration of the data using a monoclinic unit cell yielded a total of 102263 reflections to a maximum  $\theta$  angle of 30.51° (0.70Å resolution), of which 12384 were independent (average redundancy 8.258, completeness = 99.8%,  $R_{int} = 3.60\%$ ,  $R_{sig} = 1.93\%$ ) and 11629 (93.90%) were greater than  $2\sigma (F^2)$ . The final cell constants of  $a = 10.884(3) \text{ \AA}$ ,  $b = 18.130(5) \text{ \AA}$ ,  $c = 20.983(5) \text{ \AA}$ ,  $\beta = 101.172(8)^\circ$ , volume = 4062.0(18) Å<sup>3</sup>, are based upon the refinement of the XYZ-centroids of 1460 reflections above  $20 \sigma (I)$  with  $4.493^\circ < 2\theta < 51.17^\circ$ . Data were corrected for absorption effects using the Multi-Scan method (SADABS)<sup>14</sup>. The ratio of minimum to maximum apparent transmission was 0.844. The calculated minimum and maximum transmission coefficients (based on crystal size) are 0.5880 and 0.7120. The structure was solved in a triclinic unit cell using the Bruker SHELXT Software Package,<sup>15</sup> using the centrosymmetric space group: P 1 2(1)/c 1, with Z = 4 for the formula unit,  $C_{33}H_{45}Cl_7GaPRhSi_2$ . Refinement of the structure was carried out by least squares procedures on weighted  $F^2$  values using the SHELXTL-2018/3<sup>16</sup> included in the APEX3 v2019, 1.0,

AXS Bruker program<sup>17</sup>. Hydrogen atoms were localized on difference Fourier maps but then introduced in the refinement as fixed contributors in idealized geometry with an isotropic thermal parameters fixed at 20 % higher than those carbons atoms they were connected. A molecule of solvent:  $\text{CDCl}_3$  was located statistically disordered on three positions and anisotropically refined with a ratio of occupancy equal to: 33%. Restraints on interatomic lengths and angles and constraints on ADP's parameters were added in order to get a chemically reasonable model. The final anisotropic full-matrix least-squares refinement on  $F^2$  with 488 variables converged at  $R1 = 2.90\%$ , for the observed data and  $wR2 = 7.42\%$  for all data. The goodness-of-fit: GOF was 1.052. The largest peak in the final difference electron density synthesis was  $1.520 \text{ e}^-/\text{\AA}^3$  and the largest hole was  $-1.791 \text{ e}^-/\text{\AA}^3$  with an RMS deviation of  $0.098 \text{ e}^-/\text{\AA}^3$ . On the basis of the final model, the calculated density was  $1.553 \text{ g/cm}^3$  and  $F(000)$ , 1924  $e^-$ .

#### 10.4.2 Crystal's view

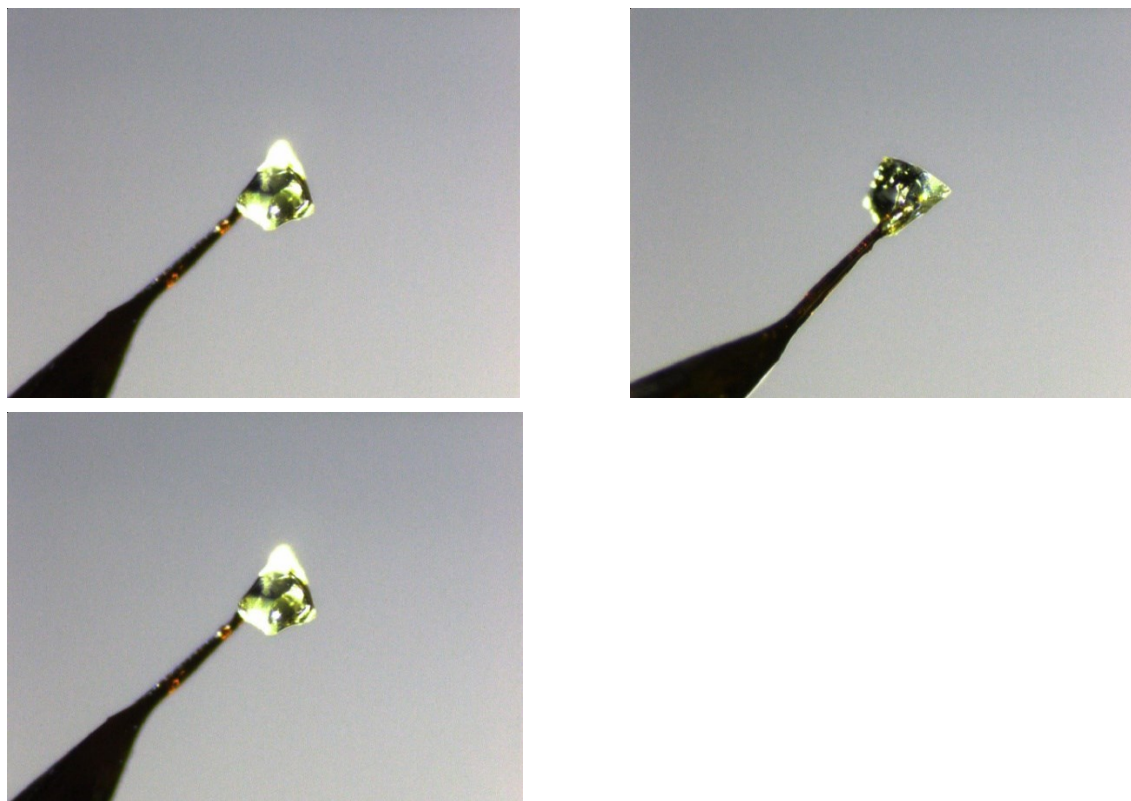

### 10.4.3 Asymmetric unit's view

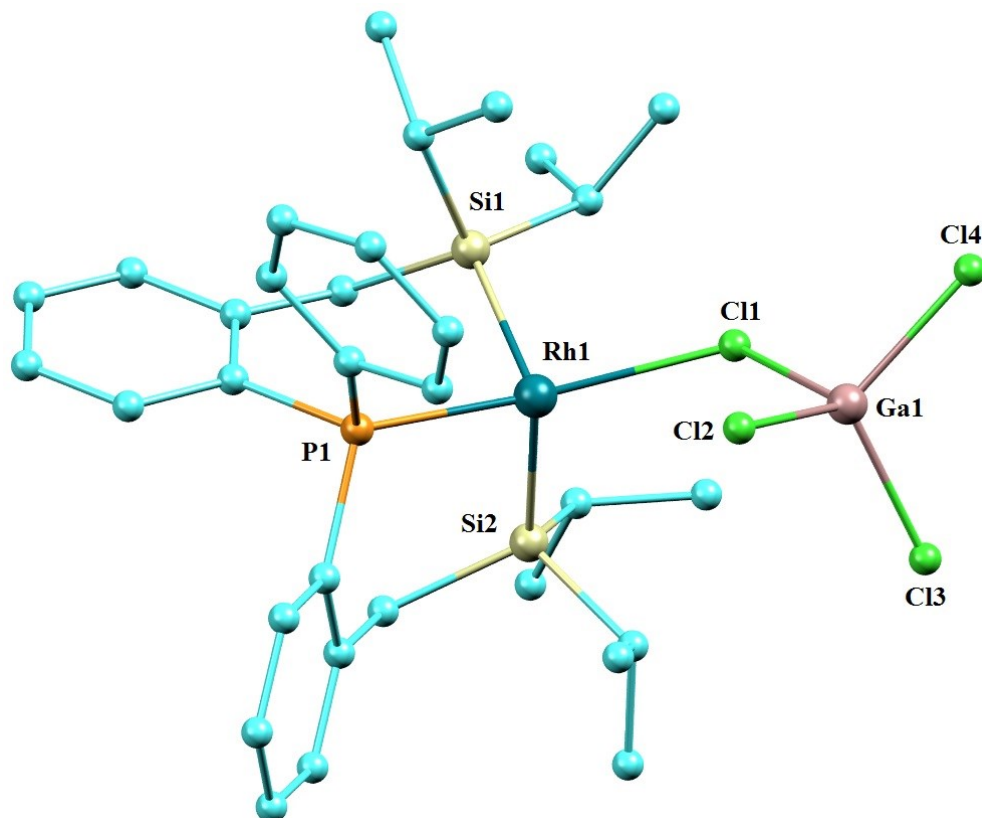

Asymmetric unit view of complex **Rh-5**

Table S20. Sample and crystal data for A\_VM\_013\_100K.

---

|                     |                                                                      |
|---------------------|----------------------------------------------------------------------|
| Identification code | A_VM_013_100K                                                        |
| Chemical formula    | C <sub>33</sub> H <sub>45</sub> Cl <sub>7</sub> GaPRhSi <sub>2</sub> |



|                               |                                         |                 |
|-------------------------------|-----------------------------------------|-----------------|
| <b>Formula weight</b>         | 949.62 g/mol                            |                 |
| <b>Temperature</b>            | 100(2) K                                |                 |
| <b>Wavelength</b>             | 0.71073 Å                               |                 |
| <b>Crystal size</b>           | (0.221 x 0.231 x 0.360) mm <sup>3</sup> |                 |
| <b>Crystal system</b>         | monoclinic                              |                 |
| <b>Space group</b>            | P 1 2(1)/c 1                            |                 |
| <b>Unit cell dimensions</b>   | a = 10.884(3) Å                         | α = 90°         |
|                               | b = 18.130(5) Å                         | β = 101.172(8)° |
|                               | c = 20.983(5) Å                         | γ = 90°         |
| <b>Volume</b>                 | 4062.0(18) Å <sup>3</sup>               |                 |
| <b>Z</b>                      | 4                                       |                 |
| <b>Density (calculated)</b>   | 1.553 g/cm <sup>3</sup>                 |                 |
| <b>Absorption coefficient</b> | 1.652 mm <sup>-1</sup>                  |                 |
| <b>F(000)</b>                 | 1924                                    |                 |

Table S21. Data collection and structure refinement for A\_VM\_013\_100K.

---

|                                        |                                    |
|----------------------------------------|------------------------------------|
| <b>Theta range for data collection</b> | 2.21 to 30.51°                     |
| <b>Index ranges</b>                    | -15<=h<=15, -25<=k<=25, -29<=l<=29 |
| <b>Reflections collected</b>           | 102263                             |

|                                            |                                                                                                                         |                              |
|--------------------------------------------|-------------------------------------------------------------------------------------------------------------------------|------------------------------|
| <b>Independent reflections</b>             | 12384 [R(int) = 0.0360]                                                                                                 |                              |
| <b>Coverage of independent reflections</b> | 99.8%                                                                                                                   |                              |
| <b>Absorption correction</b>               | Multi-Scan                                                                                                              |                              |
| <b>Max. and min. transmission</b>          | 0.7120 and 0.5880                                                                                                       |                              |
| <b>Refinement method</b>                   | Full-matrix least-squares on F <sup>2</sup>                                                                             |                              |
| <b>Refinement program</b>                  | SHELXL-2018/3 (Sheldrick, 2018)                                                                                         |                              |
| <b>Function minimized</b>                  | $\Sigma w (F_o^2 - F_c^2)^2$                                                                                            |                              |
| <b>Data / restraints / parameters</b>      | 12384 / 282 / 488                                                                                                       |                              |
| <b>Goodness-of-fit on F<sup>2</sup></b>    | 1.052                                                                                                                   |                              |
| <b><math>\Delta/\sigma_{\max}</math></b>   | 0.003                                                                                                                   |                              |
| <b>Final R indices</b>                     | 11629 data;<br>I > 2 $\sigma$ (I)                                                                                       | R1 = 0.0290, wR2 =<br>0.0728 |
|                                            | all data                                                                                                                | R1 = 0.0314, wR2 =<br>0.0742 |
| <b>Weighting scheme</b>                    | w=1/[ $\sigma^2(F_o^2)+(0.0295P)^2+7.0876P$ ]<br>where P=(F <sub>o</sub> <sup>2</sup> +2F <sub>c</sub> <sup>2</sup> )/3 |                              |
| <b>Extinction coefficient</b>              | 0.0024(1)                                                                                                               |                              |
| <b>Largest diff. peak and hole</b>         | 1.520 and -1.791 eÅ <sup>-3</sup>                                                                                       |                              |
| <b>R.M.S. deviation from mean</b>          | 0.098 eÅ <sup>-3</sup>                                                                                                  |                              |

**Table S22. Bond lengths (Å) for A\_VM\_013\_100K.**

---

|         |            |         |            |
|---------|------------|---------|------------|
| Rh1-P1  | 2.2002(6)  | Rh1-Si2 | 2.3116(7)  |
| Rh1-Si1 | 2.3156(7)  | Rh1-Cl1 | 2.4243(6)  |
| P1-C8   | 1.8181(17) | P1-C15  | 1.8220(17) |
| P1-C7   | 1.8306(17) | Si1-C1  | 1.8964(18) |
| Si1-C21 | 1.9033(18) | Si1-C24 | 1.9054(19) |
| Si2-C27 | 1.9026(18) | Si2-C14 | 1.9047(18) |
| Si2-C30 | 1.9096(18) | Ga1-Cl3 | 2.1483(7)  |
| Ga1-Cl2 | 2.1528(7)  | Ga1-Cl4 | 2.1572(7)  |
| Ga1-Cl1 | 2.2677(7)  | C1-C2   | 1.506(2)   |
| C1-H1   | 0.95       | C2-C3   | 1.409(2)   |
| C2-C7   | 1.410(2)   | C3-C4   | 1.393(3)   |
| C3-H3   | 0.95       | C4-C5   | 1.389(3)   |
| C4-H4   | 0.95       | C5-C6   | 1.391(2)   |
| C5-H5   | 0.95       | C6-C7   | 1.407(2)   |
| C6-H6   | 0.95       | C8-C9   | 1.403(2)   |
| C8-C13  | 1.410(2)   | C9-C10  | 1.391(3)   |
| C9-H9   | 0.95       | C10-C11 | 1.392(3)   |
| C10-H10 | 0.95       | C11-C12 | 1.392(3)   |
| C11-H11 | 0.95       | C12-C13 | 1.399(2)   |
| C12-H12 | 0.95       | C13-C14 | 1.505(2)   |

|          |          |          |          |
|----------|----------|----------|----------|
| C14-H14A | 0.99     | C14-H14B | 0.99     |
| C15-C16  | 1.400(2) | C15-C20  | 1.404(2) |
| C16-C17  | 1.392(2) | C16-H16  | 0.95     |
| C17-C18  | 1.391(3) | C17-H17  | 0.95     |
| C18-C19  | 1.393(3) | C18-H18  | 0.95     |
| C19-C20  | 1.390(2) | C19-H19  | 0.95     |
| C20-H20  | 0.95     | C21-C23  | 1.533(2) |
| C21-C22  | 1.543(3) | C21-H21  | 1.0      |
| C22-H22A | 0.98     | C22-H22B | 0.98     |
| C22-H22C | 0.98     | C23-H23A | 0.98     |
| C23-H23B | 0.98     | C23-H23C | 0.98     |
| C24-C26  | 1.538(3) | C24-C25  | 1.544(3) |
| C24-H24  | 1.0      | C25-H25A | 0.98     |
| C25-H25B | 0.98     | C25-H25C | 0.98     |
| C26-H26A | 0.98     | C26-H26B | 0.98     |
| C26-H26C | 0.98     | C27-C28  | 1.537(3) |
| C27-C29  | 1.541(3) | C27-H27  | 1.0      |
| C28-H28A | 0.98     | C28-H28B | 0.98     |
| C28-H28C | 0.98     | C29-H29A | 0.98     |
| C29-H29B | 0.98     | C29-H29C | 0.98     |
| C30-C31  | 1.538(3) | C30-C32  | 1.542(3) |
| C30-H30  | 1.0      | C31-H31A | 0.98     |

|          |          |          |          |
|----------|----------|----------|----------|
| C31-H31B | 0.98     | C31-H31C | 0.98     |
| C32-H32A | 0.98     | C32-H32B | 0.98     |
| C32-H32C | 0.98     | C1S-Cl1S | 1.502(8) |
| C1S-Cl3S | 1.696(7) | C1S-Cl2S | 1.810(7) |
| C1S-H1S  | 1.0      | C1T-Cl1T | 1.500(8) |
| C1T-Cl3T | 1.694(7) | C1T-Cl2T | 1.810(7) |
| C1T-H1T  | 1.0      | C1U-Cl1U | 1.507(8) |
| C1U-Cl3U | 1.700(8) | C1U-Cl2U | 1.809(7) |
| C1U-H1U  | 1.0      |          |          |

**Table S23. Bond angles (°) for A\_VM\_013\_100K.**

---

|             |            |             |             |
|-------------|------------|-------------|-------------|
| P1-Rh1-Si2  | 89.40(2)   | P1-Rh1-Si1  | 87.18(2)    |
| Si2-Rh1-Si1 | 99.265(18) | P1-Rh1-Cl1  | 167.509(17) |
| Si2-Rh1-Cl1 | 101.46(2)  | Si1-Rh1-Cl1 | 97.01(2)    |
| C8-P1-C15   | 106.10(8)  | C8-P1-C7    | 102.42(8)   |
| C15-P1-C7   | 105.76(8)  | C8-P1-Rh1   | 114.21(6)   |
| C15-P1-Rh1  | 100.26(6)  | C7-P1-Rh1   | 126.35(6)   |
| C1-Si1-C21  | 105.52(8)  | C1-Si1-C24  | 108.56(8)   |
| C21-Si1-C24 | 114.05(8)  | C1-Si1-Rh1  | 112.72(6)   |
| C21-Si1-Rh1 | 105.63(6)  | C24-Si1-Rh1 | 110.34(6)   |

|             |            |             |            |
|-------------|------------|-------------|------------|
| C27-Si2-C14 | 108.89(8)  | C27-Si2-C30 | 111.17(8)  |
| C14-Si2-C30 | 109.18(8)  | C27-Si2-Rh1 | 115.02(6)  |
| C14-Si2-Rh1 | 112.30(6)  | C30-Si2-Rh1 | 99.93(6)   |
| Cl3-Ga1-Cl2 | 112.86(3)  | Cl3-Ga1-Cl4 | 111.66(3)  |
| Cl2-Ga1-Cl4 | 113.86(3)  | Cl3-Ga1-Cl1 | 106.09(3)  |
| Cl2-Ga1-Cl1 | 106.77(2)  | Cl4-Ga1-Cl1 | 104.82(2)  |
| Ga1-Cl1-Rh1 | 118.35(2)  | C2-C1-Si1   | 115.92(12) |
| C2-C1-H1    | 122.0      | Si1-C1-H1   | 122.0      |
| C3-C2-C7    | 117.63(16) | C3-C2-C1    | 119.03(16) |
| C7-C2-C1    | 123.32(15) | C4-C3-C2    | 121.84(17) |
| C4-C3-H3    | 119.1      | C2-C3-H3    | 119.1      |
| C5-C4-C3    | 120.14(17) | C5-C4-H4    | 119.9      |
| C3-C4-H4    | 119.9      | C4-C5-C6    | 119.08(17) |
| C4-C5-H5    | 120.5      | C6-C5-H5    | 120.5      |
| C5-C6-C7    | 121.40(17) | C5-C6-H6    | 119.3      |
| C7-C6-H6    | 119.3      | C6-C7-C2    | 119.79(15) |
| C6-C7-P1    | 114.68(13) | C2-C7-P1    | 125.47(13) |
| C9-C8-C13   | 120.60(16) | C9-C8-P1    | 121.95(13) |
| C13-C8-P1   | 117.44(13) | C10-C9-C8   | 120.32(17) |
| C10-C9-H9   | 119.8      | C8-C9-H9    | 119.8      |
| C9-C10-C11  | 119.47(18) | C9-C10-H10  | 120.3      |
| C11-C10-H10 | 120.3      | C12-C11-C10 | 120.31(17) |

|               |            |               |            |
|---------------|------------|---------------|------------|
| C12-C11-H11   | 119.8      | C10-C11-H11   | 119.8      |
| C11-C12-C13   | 121.34(17) | C11-C12-H12   | 119.3      |
| C13-C12-H12   | 119.3      | C12-C13-C8    | 117.94(16) |
| C12-C13-C14   | 120.93(15) | C8-C13-C14    | 121.12(15) |
| C13-C14-Si2   | 114.06(11) | C13-C14-H14A  | 108.7      |
| Si2-C14-H14A  | 108.7      | C13-C14-H14B  | 108.7      |
| Si2-C14-H14B  | 108.7      | H14A-C14-H14B | 107.6      |
| C16-C15-C20   | 119.30(15) | C16-C15-P1    | 124.65(13) |
| C20-C15-P1    | 115.61(12) | C17-C16-C15   | 119.90(16) |
| C17-C16-H16   | 120.1      | C15-C16-H16   | 120.1      |
| C18-C17-C16   | 120.43(17) | C18-C17-H17   | 119.8      |
| C16-C17-H17   | 119.8      | C17-C18-C19   | 120.11(17) |
| C17-C18-H18   | 119.9      | C19-C18-H18   | 119.9      |
| C20-C19-C18   | 119.75(17) | C20-C19-H19   | 120.1      |
| C18-C19-H19   | 120.1      | C19-C20-C15   | 120.51(16) |
| C19-C20-H20   | 119.7      | C15-C20-H20   | 119.7      |
| C23-C21-C22   | 111.43(15) | C23-C21-Si1   | 116.31(13) |
| C22-C21-Si1   | 111.91(12) | C23-C21-H21   | 105.4      |
| C22-C21-H21   | 105.4      | Si1-C21-H21   | 105.4      |
| C21-C22-H22A  | 109.5      | C21-C22-H22B  | 109.5      |
| H22A-C22-H22B | 109.5      | C21-C22-H22C  | 109.5      |
| H22A-C22-H22C | 109.5      | H22B-C22-H22C | 109.5      |

|               |            |               |            |
|---------------|------------|---------------|------------|
| C21-C23-H23A  | 109.5      | C21-C23-H23B  | 109.5      |
| H23A-C23-H23B | 109.5      | C21-C23-H23C  | 109.5      |
| H23A-C23-H23C | 109.5      | H23B-C23-H23C | 109.5      |
| C26-C24-C25   | 109.84(15) | C26-C24-Si1   | 112.95(12) |
| C25-C24-Si1   | 112.70(13) | C26-C24-H24   | 107.0      |
| C25-C24-H24   | 107.0      | Si1-C24-H24   | 107.0      |
| C24-C25-H25A  | 109.5      | C24-C25-H25B  | 109.5      |
| H25A-C25-H25B | 109.5      | C24-C25-H25C  | 109.5      |
| H25A-C25-H25C | 109.5      | H25B-C25-H25C | 109.5      |
| C24-C26-H26A  | 109.5      | C24-C26-H26B  | 109.5      |
| H26A-C26-H26B | 109.5      | C24-C26-H26C  | 109.5      |
| H26A-C26-H26C | 109.5      | H26B-C26-H26C | 109.5      |
| C28-C27-C29   | 110.03(16) | C28-C27-Si2   | 112.81(14) |
| C29-C27-Si2   | 111.96(13) | C28-C27-H27   | 107.2      |
| C29-C27-H27   | 107.2      | Si2-C27-H27   | 107.2      |
| C27-C28-H28A  | 109.5      | C27-C28-H28B  | 109.5      |
| H28A-C28-H28B | 109.5      | C27-C28-H28C  | 109.5      |
| H28A-C28-H28C | 109.5      | H28B-C28-H28C | 109.5      |
| C27-C29-H29A  | 109.5      | C27-C29-H29B  | 109.5      |
| H29A-C29-H29B | 109.5      | C27-C29-H29C  | 109.5      |
| H29A-C29-H29C | 109.5      | H29B-C29-H29C | 109.5      |
| C31-C30-C32   | 109.64(16) | C31-C30-Si2   | 113.96(12) |



|               |            |               |          |
|---------------|------------|---------------|----------|
| C32-C30-Si2   | 112.05(13) | C31-C30-H30   | 106.9    |
| C32-C30-H30   | 106.9      | Si2-C30-H30   | 106.9    |
| C30-C31-H31A  | 109.5      | C30-C31-H31B  | 109.5    |
| H31A-C31-H31B | 109.5      | C30-C31-H31C  | 109.5    |
| H31A-C31-H31C | 109.5      | H31B-C31-H31C | 109.5    |
| C30-C32-H32A  | 109.5      | C30-C32-H32B  | 109.5    |
| H32A-C32-H32B | 109.5      | C30-C32-H32C  | 109.5    |
| H32A-C32-H32C | 109.5      | H32B-C32-H32C | 109.5    |
| Cl1S-C1S-Cl3S | 116.9(5)   | Cl1S-C1S-Cl2S | 112.6(4) |
| Cl3S-C1S-Cl2S | 97.7(4)    | Cl1S-C1S-H1S  | 109.7    |
| Cl3S-C1S-H1S  | 109.7      | Cl2S-C1S-H1S  | 109.7    |
| Cl1T-C1T-Cl3T | 128.1(7)   | Cl1T-C1T-Cl2T | 112.3(6) |
| Cl3T-C1T-Cl2T | 103.4(5)   | Cl1T-C1T-H1T  | 103.4    |
| Cl3T-C1T-H1T  | 103.4      | Cl2T-C1T-H1T  | 103.4    |
| Cl1U-C1U-Cl3U | 115.3(7)   | Cl1U-C1U-Cl2U | 105.5(5) |
| Cl3U-C1U-Cl2U | 96.4(5)    | Cl1U-C1U-H1U  | 112.8    |
| Cl3U-C1U-H1U  | 112.8      | Cl2U-C1U-H1U  | 112.8    |

## 11 References Experimental Section

1. G. Giordano and R. H. Crabtree, "Di- $\mu$ -Chloro-Bis( $\eta^4$ -1,5-Cyclooctadiene) Dirhodium(I)," *Inorganic Synthesis*, 1979, **19**, 218-220.
2. G. W. Parshall, *Inorganic Syntheses*, 1974, **15**, 18
